# Supplementary material for: Image-based epigenetic profiling with deep learning and high-speed super-resolution microscopy
Source: Epigenetics Chromatin. 2026 Feb 28;19:15. doi: 10.1186/s13072-026-00662-5 (PMC13059569; doi:10.1186/s13072-026-00662-5)
Supplement: Supplementary file 1 — Supplementary Material 1 [file 13072_2026_662_MOESM1_ESM.xlsx]

## Sheet: Table S1
gene	chr	start	end	gene_biotype	description	strand	width	baseMean	log2FoldChange	lfcSE	stat	pvalue	padj	significance
EEF1A2	chr20	63488014	63499083	protein_coding	eukaryotic translation elongation factor 1 alpha 2	-	11070	3561.08	1.72278	0.0501589	34.3465	1.58714e-258	3.04968e-254	up
KIF1A	chr2	240713767	240821403	protein_coding	kinesin family member 1A	-	107637	3670.91	1.52756	0.0458552	33.3127	2.53096e-243	2.43162e-239	up
ATP1A3	chr19	41966582	41994230	protein_coding	ATPase Na+/K+ transporting subunit alpha 3	-	27649	1399.63	1.98164	0.0621385	31.8907	3.59313e-223	2.3014e-219	up
KIF5C	chr2	148875227	149026759	protein_coding	kinesin family member 5C	+	151533	1087.34	2.31434	0.0733022	31.5726	8.77074e-219	4.21324e-215	up
SPEN	chr1	15847707	15940456	protein_coding	spen family transcriptional repressor	+	92750	10851.4	-1.21854	0.0402182	-30.2981	1.21399e-201	4.66536e-198	down
NOVA2	chr19	45933734	45973865	protein_coding	NOVA alternative splicing regulator 2	-	40132	495.063	3.54967	0.120396	29.4833	4.71977e-191	1.51151e-187	up
CRABP2	chr1	156699606	156705784	protein_coding	cellular retinoic acid binding protein 2	-	6179	825.108	2.4849	0.0855513	29.0457	1.74235e-185	4.78276e-182	up
MAPT	chr17	45894554	46028334	protein_coding	microtubule associated protein tau	+	133781	845.072	2.15496	0.0780456	27.6116	8.0784e-168	1.94033e-164	up
SYT2	chr1	202590596	202710454	protein_coding	synaptotagmin 2	-	119859	666.76	2.46031	0.090191	27.2789	7.55697e-164	1.61341e-160	up
SLIT2	chr4	20251905	20620561	protein_coding	slit guidance ligand 2	+	368657	6642.08	-1.0842	0.0398241	-27.2247	3.3167e-163	6.37303e-160	down
CNTN1	chr12	40692439	41072415	protein_coding	contactin 1	+	379977	844.944	2.16849	0.0800765	27.0802	1.68512e-161	2.9436e-158	up
ADI1	chr2	3497366	3519531	protein_coding	acireductone dioxygenase 1	-	22166	2146.87	-1.64705	0.0608581	-27.0638	2.63124e-161	4.21327e-158	down
STUM	chr1	226548764	226609230	protein_coding	stum, mechanosensory transduction mediator homolog	+	60467	606.172	2.68131	0.100731	26.6185	4.1451e-156	6.12677e-153	up
NDRG4	chr16	58463715	58515387	protein_coding	NDRG family member 4	+	51673	870.475	1.9633	0.0763679	25.7084	9.41676e-146	1.29245e-142	up
NPTX2	chr7	98617285	98629869	protein_coding	neuronal pentraxin 2	+	12585	699.724	2.06003	0.0830975	24.7905	1.13584e-135	1.45501e-132	up
ADGRB2	chr1	31727117	31764340	protein_coding	adhesion G protein-coupled receptor B2	-	37224	1111.57	1.78735	0.0730944	24.4526	4.71615e-132	5.6638e-129	up
CD24	chr6	106969831	106976855	protein_coding	CD24 molecule	-	7025	339.366	4.50391	0.184624	24.3951	1.9292e-131	2.18057e-128	up
GNAO1	chr16	56191489	56357444	protein_coding	G protein subunit alpha o1	+	165956	377.499	3.00753	0.123511	24.3503	5.75621e-131	6.14475e-128	up
NFASC	chr1	204828652	205022822	protein_coding	neurofascin	+	194171	332.886	3.32391	0.138639	23.9754	5.02781e-127	5.0847e-124	up
ADCYAP1R1	chr7	31052308	31111474	protein_coding	ADCYAP receptor type I	+	59167	523.01	2.22371	0.0940539	23.6429	1.39677e-123	1.34195e-120	up
TUBA4A	chr2	219249710	219254740	protein_coding	tubulin alpha 4a	-	5031	414.552	2.64514	0.112785	23.453	1.23218e-121	1.12745e-118	up
BASP1	chr5	17216823	17276834	protein_coding	brain abundant membrane attached signal protein 1	+	60012	821.347	1.73041	0.0739907	23.3868	5.82553e-121	5.08807e-118	up
LRP1	chr12	57128483	57213361	protein_coding	LDL receptor related protein 1	+	84879	2048.6	1.31092	0.0563084	23.2812	6.88092e-120	5.74856e-117	up
AGAP2	chr12	57723761	57742161	protein_coding	ArfGAP with GTPase domain, ankyrin repeat and PH domain 2	-	18401	371.955	2.73594	0.118983	22.9944	5.30564e-117	4.24783e-114	up
SEPTIN3	chr22	41969443	41998221	protein_coding	septin 3	+	28779	2000.92	1.47466	0.0650835	22.6579	1.16556e-113	8.9585e-111	up
MMP2	chr16	55478830	55506691	protein_coding	matrix metallopeptidase 2	+	27862	309.52	3.18969	0.141134	22.6004	4.29427e-113	3.17363e-110	up
CACNA1G	chr17	50560715	50627474	protein_coding	calcium voltage-gated channel subunit alpha1 G	+	66760	293.729	3.72869	0.165832	22.4847	5.85866e-112	4.16942e-109	up
FEZ1	chr11	125442881	125496265	protein_coding	fasciculation and elongation protein zeta 1	-	53385	321.666	2.8964	0.130621	22.1741	6.10203e-109	4.18751e-106	up
SEMA6B	chr19	4542593	4559684	protein_coding	semaphorin 6B	-	17092	404.949	2.42934	0.109899	22.1053	2.8128e-108	1.86372e-105	up
GNG4	chr1	235547685	235650608	protein_coding	G protein subunit gamma 4	-	102924	1296.06	1.44831	0.0663278	21.8356	1.06504e-105	6.8216e-103	up
PRKCB	chr16	23835983	24220611	protein_coding	protein kinase C beta	+	384629	261.805	3.44583	0.157899	21.823	1.40477e-105	8.70729e-103	up
HLA-B	chr6	31353875	31357179	protein_coding	major histocompatibility complex, class I, B	-	3305	2982.16	1.15893	0.0533161	21.737	9.17081e-105	5.50678e-102	up
FN1	chr2	215360865	215436068	protein_coding	fibronectin 1	-	75204	3128.98	1.08352	0.0508327	21.3154	8.17167e-101	4.75814e-98	up
DNM1	chr9	128203379	128255244	protein_coding	dynamin 1	+	51866	972.105	1.50683	0.0707378	21.3016	1.09752e-100	6.20262e-98	up
TUBB4A	chr19	6494319	6502848	protein_coding	tubulin beta 4A class IVa	-	8530	1170.36	1.3521	0.0636401	21.246	3.58856e-100	1.97012e-97	up
SCUBE1	chr22	43197280	43343372	protein_coding	signal peptide, CUB domain and EGF like domain containing 1	-	146093	298.341	2.77314	0.131263	21.1265	4.53812e-99	2.42222e-96	up
PALM3	chr19	14053367	14062076	protein_coding	paralemmin 3	-	8710	497.531	2.1554	0.102675	20.9924	7.70238e-98	4.00004e-95	up
HOXB9	chr17	48621156	48626358	protein_coding	homeobox B9	-	5203	3269.28	-1.00618	0.0483078	-20.8285	2.38732e-96	1.20716e-93	down
FLNC	chr7	128830406	128859272	protein_coding	filamin C	+	28867	2732.46	1.13007	0.0543676	20.7857	5.83481e-96	2.87477e-93	up
LARGE2	chr11	45921621	45929096	protein_coding	LARGE xylosyl- and glucuronyltransferase 2	+	7476	571.714	1.811	0.0880206	20.5747	4.62687e-94	2.22263e-91	up
SYT7	chr11	61513714	61588387	protein_coding	synaptotagmin 7	-	74674	556.21	1.82213	0.0890902	20.4527	5.6866e-93	2.60162e-90	up
MAP1B	chr5	72107475	72209565	protein_coding	microtubule associated protein 1B	+	102091	2137.32	1.16921	0.0579981	20.1595	2.22148e-90	9.92693e-88	up
COL1A1	chr17	50184101	50201631	protein_coding	collagen type I alpha 1 chain	-	17531	852.607	1.54847	0.0774127	20.0028	5.2053e-89	2.27318e-86	up
TP53I11	chr11	44932348	44951306	protein_coding	tumor protein p53 inducible protein 11	-	18959	1872.56	1.12724	0.056418	19.9802	8.18545e-89	3.49519e-86	up
HAPLN3	chr15	88877294	88895544	protein_coding	hyaluronan and proteoglycan link protein 3	-	18251	657.824	1.60238	0.080479	19.9105	3.30198e-88	1.37929e-85	up
NMNAT2	chr1	183248237	183418380	protein_coding	nicotinamide nucleotide adenylyltransferase 2	-	170144	213.269	4.03911	0.203759	19.823	1.88454e-87	7.70455e-85	up
ABCA3	chr16	2275881	2340728	protein_coding	ATP binding cassette subfamily A member 3	-	64848	1163.75	1.22018	0.0623565	19.5678	2.91087e-85	1.16526e-82	up
HOXD11	chr2	176107280	176115679	protein_coding	homeobox D11	+	8400	2591.55	-1.01211	0.0518563	-19.5176	7.77523e-85	3.049e-82	down
HLA-F	chr6	29723434	29738532	protein_coding	major histocompatibility complex, class I, F	+	15099	420.134	1.98183	0.101823	19.4634	2.24504e-84	8.62767e-82	up
SNCB	chr5	176620082	176630534	protein_coding	synuclein beta	-	10453	245.57	2.79604	0.144259	19.382	1.09519e-83	4.12629e-81	up
FAM131B	chr7	143353400	143382304	protein_coding	family with sequence similarity 131 member B	-	28905	207.299	4.87944	0.252463	19.3274	3.16035e-83	1.14578e-80	up
NES	chr1	156668763	156677407	protein_coding	nestin	-	8645	416.98	1.98983	0.103082	19.3034	5.02435e-83	1.78783e-80	up
LAMA1	chr18	6941742	7117797	protein_coding	laminin subunit alpha 1	-	176056	1326.64	1.17272	0.0607565	19.302	5.17188e-83	1.80687e-80	up
CAVIN1	chr17	42402449	42423256	protein_coding	caveolae associated protein 1	-	20808	661.985	1.54617	0.0804518	19.2186	2.58784e-82	8.87953e-80	up
PXDN	chr2	1631887	1744901	protein_coding	peroxidasin	-	113015	1955.7	1.02842	0.0536234	19.1785	5.60154e-82	1.88831e-79	up
TMEM59L	chr19	18612870	18621039	protein_coding	transmembrane protein 59 like	+	8170	238.802	2.89602	0.152162	19.0325	9.17732e-81	3.04038e-78	up
NKX1-2	chr10	124445243	124450035	protein_coding	NK1 homeobox 2	-	4793	367.797	2.08798	0.110034	18.9757	2.70895e-80	8.82244e-78	up
PLXND1	chr3	129555214	129606676	protein_coding	plexin D1	-	51463	1084.04	1.24498	0.0656585	18.9614	3.55409e-80	1.1382e-77	up
HPCAL4	chr1	39678648	39691433	protein_coding	hippocalcin like 4	-	12786	404.497	1.9464	0.10309	18.8806	1.64592e-79	5.18464e-77	up
PTPRZ1	chr7	121873161	122062036	protein_coding	protein tyrosine phosphatase receptor type Z1	+	188876	227.521	2.8156	0.14978	18.7982	7.8092e-79	2.42022e-76	up
GAP43	chr3	115623510	115721483	protein_coding	growth associated protein 43	+	97974	223.641	2.85975	0.152354	18.7704	1.3186e-78	3.95888e-76	up
CNN2	chr19	1026608	1039065	protein_coding	calponin 2	+	12458	1432.17	1.14855	0.0616607	18.627	1.9427e-77	5.6559e-75	up
TGFB1	chr19	41330323	41353922	protein_coding	transforming growth factor beta 1	-	23600	744.022	1.3875	0.074871	18.5319	1.14137e-76	3.27335e-74	up
COL3A1	chr2	188974373	189012746	protein_coding	collagen type III alpha 1 chain	+	38374	277.86	2.36914	0.127976	18.5124	1.63888e-76	4.63105e-74	up
NID2	chr14	52004809	52069059	protein_coding	nidogen 2	-	64251	1356.95	1.08828	0.0588379	18.4962	2.21689e-76	6.17355e-74	up
PARM1	chr4	74933116	75050113	protein_coding	prostate androgen-regulated mucin-like protein 1	+	116998	464.591	1.82884	0.0996173	18.3586	2.81576e-75	7.72926e-73	up
APLP1	chr19	35868574	35879792	protein_coding	amyloid beta precursor like protein 1	+	11219	460.738	1.74543	0.0951687	18.3404	3.94048e-75	1.06643e-72	up
OLFM2	chr19	9853718	9936515	protein_coding	olfactomedin 2	-	82798	279.641	2.30784	0.125943	18.3244	5.28447e-75	1.41029e-72	up
EPHB2	chr1	22710838	22921500	protein_coding	EPH receptor B2	+	210663	732.391	1.37301	0.0752083	18.2561	1.84998e-74	4.8037e-72	up
IGFBP5	chr2	216672105	216695549	protein_coding	insulin like growth factor binding protein 5	-	23445	1418.51	1.14679	0.0630633	18.1847	6.82199e-74	1.74779e-71	up
MEIS3	chr19	47403124	47422233	protein_coding	Meis homeobox 3	-	19110	494.386	1.74238	0.0960451	18.1413	1.50463e-73	3.80413e-71	up
RAB3B	chr1	51907956	51990700	protein_coding	RAB3B, member RAS oncogene family	-	82745	640.314	1.49264	0.0831192	17.9579	4.16468e-72	1.03928e-69	up
S100A11	chr1	152032506	152037004	protein_coding	S100 calcium binding protein A11	-	4499	853.037	1.27244	0.071075	17.9028	1.12063e-71	2.76062e-69	up
CDH1	chr16	68737292	68835537	protein_coding	cadherin 1	+	98246	398.651	1.89289	0.105796	17.8918	1.36706e-71	3.32507e-69	up
KCNC3	chr19	50311937	50333536	protein_coding	potassium voltage-gated channel subfamily C member 3	-	21600	475.094	1.66274	0.0932105	17.8386	3.54755e-71	8.41557e-69	up
KIF21B	chr1	200969390	201023714	protein_coding	kinesin family member 21B	-	54325	624.948	1.47871	0.0830722	17.8003	7.02528e-71	1.64623e-68	up
FNDC1	chr6	159169400	159272108	protein_coding	fibronectin type III domain containing 1	+	102709	189.755	2.98253	0.167604	17.7951	7.71174e-71	1.78531e-68	up
NPTXR	chr22	38818452	38844028	protein_coding	neuronal pentraxin receptor	-	25577	321.61	2.06082	0.115821	17.793	8.00113e-71	1.83026e-68	up
UBE2L6	chr11	57551662	57567935	protein_coding	ubiquitin conjugating enzyme E2 L6	-	16274	191.493	3.0376	0.170744	17.7904	8.38978e-71	1.89658e-68	up
NELL2	chr12	44508275	44921848	protein_coding	neural EGFL like 2	-	413574	1416.08	1.09864	0.0619152	17.7442	1.91049e-70	4.21955e-68	up
PCDH1	chr5	141853090	141878410	protein_coding	protocadherin 1	-	25321	199.206	2.84895	0.160571	17.7426	1.96668e-70	4.29429e-68	up
FSCN1	chr7	5592816	5606655	protein_coding	fascin actin-bundling protein 1	+	13840	2664.85	1.24624	0.0703911	17.7044	3.87512e-70	8.27337e-68	up
KCNH2	chr7	150944961	150978321	protein_coding	potassium voltage-gated channel subfamily H member 2	-	33361	261.124	2.44456	0.138156	17.6943	4.64181e-70	9.80137e-68	up
PPP1R1A	chr12	54579246	54588659	protein_coding	protein phosphatase 1 regulatory inhibitor subunit 1A	-	9414	217.888	2.62553	0.148456	17.6857	5.40903e-70	1.12972e-67	up
CNTNAP2	chr7	146116801	148420998	protein_coding	contactin associated protein 2	+	2304198	1579.58	1.12254	0.0635289	17.6698	7.1615e-70	1.47966e-67	up
SUSD4	chr1	223220831	223365235	protein_coding	sushi domain containing 4	-	144405	184.875	3.09344	0.175141	17.6626	8.14685e-70	1.66534e-67	up
CLSTN3	chr12	7129093	7158945	protein_coding	calsyntenin 3	+	29853	1353.92	1.05975	0.0602496	17.5893	2.97288e-69	5.95042e-67	up
B4GALNT1	chr12	57623409	57633201	protein_coding	beta-1,4-N-acetyl-galactosaminyltransferase 1	-	9793	809.573	1.29192	0.0734567	17.5875	3.07215e-69	6.08571e-67	up
ITGA4	chr2	181457205	181538940	protein_coding	integrin subunit alpha 4	+	81736	427.922	1.75801	0.100008	17.5786	3.59283e-69	7.04452e-67	up
TNRC18	chr7	5306811	5423834	protein_coding	trinucleotide repeat containing 18	-	117024	2284.89	-1.17875	0.0671195	-17.562	4.8165e-69	9.34839e-67	down
AFAP1L2	chr10	114280725	114405175	protein_coding	actin filament associated protein 1 like 2	-	124451	174.191	3.21418	0.184281	17.4418	3.97489e-68	7.58476e-66	up
CRMP1	chr4	5820764	5893086	protein_coding	collapsin response mediator protein 1	-	72323	159.104	3.98817	0.228666	17.441	4.02626e-68	7.58476e-66	up
TMEM63C	chr14	77181798	77259495	protein_coding	transmembrane protein 63C	+	77698	357.151	1.89175	0.108574	17.4236	5.45959e-68	1.0185e-65	up
PPP1R16B	chr20	38805697	38923024	protein_coding	protein phosphatase 1 regulatory subunit 16B	+	117328	325.85	2.01012	0.115984	17.331	2.74413e-67	5.07005e-65	up
CPT1A	chr11	68754620	68844277	protein_coding	carnitine palmitoyltransferase 1A	-	89658	1100.9	1.16659	0.0674415	17.2979	4.88079e-67	8.84758e-65	up
HOXB6	chr17	48595751	48604986	protein_coding	homeobox B6	-	9236	1472.73	-1.06324	0.0616652	-17.2421	1.28194e-66	2.25987e-64	down
CRLF1	chr19	18593237	18606799	protein_coding	cytokine receptor like factor 1	-	13563	169.718	3.32802	0.193409	17.2072	2.34504e-66	4.09636e-64	up
EFEMP1	chr2	55865967	55923782	protein_coding	EGF containing fibulin extracellular matrix protein 1	-	57816	297.843	2.1525	0.125156	17.1985	2.72353e-66	4.71466e-64	up
JAG2	chr14	105140995	105168776	protein_coding	jagged canonical Notch ligand 2	-	27782	972.506	1.23181	0.0718118	17.1533	5.94311e-66	1.01962e-63	up
REEP2	chr5	138439057	138446965	protein_coding	receptor accessory protein 2	+	7909	963.728	1.17731	0.0687328	17.1288	9.05606e-66	1.53993e-63	up
VGLL3	chr3	86937973	86991149	protein_coding	vestigial like family member 3	-	53177	358.315	1.79868	0.106016	16.9661	1.46333e-64	2.46647e-62	up
ITIH5	chr10	7559270	7666966	protein_coding	inter-alpha-trypsin inhibitor heavy chain 5	-	107697	163.199	3.22944	0.190807	16.9251	2.93603e-64	4.86343e-62	up
IFI30	chr19	18173813	18178117	protein_coding	IFI30 lysosomal thiol reductase	+	4305	649.264	1.35427	0.0800607	16.9156	3.45521e-64	5.67451e-62	up
NEFL	chr8	24950955	24956612	protein_coding	neurofilament light chain	-	5658	1520.59	1.03156	0.061326	16.821	1.71336e-63	2.79002e-61	up
ATP1B2	chr17	7646627	7657770	protein_coding	ATPase Na+/K+ transporting subunit beta 2	+	11144	284.863	2.08552	0.124138	16.8	2.44004e-63	3.93994e-61	up
NEURL1B	chr5	172641263	172691540	protein_coding	neuralized E3 ubiquitin protein ligase 1B	+	50278	326.032	1.84701	0.110248	16.7533	5.35745e-63	8.57862e-61	up
RAB6B	chr3	133824235	133895882	protein_coding	RAB6B, member RAS oncogene family	-	71648	865.442	1.27658	0.0765666	16.6728	2.06529e-62	3.25284e-60	up
SFXN3	chr10	101031234	101041241	protein_coding	sideroflexin 3	+	10008	544.212	1.47279	0.0886629	16.6111	5.79093e-62	9.04657e-60	up
TESC	chr12	117038923	117099416	protein_coding	tescalcin	-	60494	433.974	1.61312	0.0971205	16.6095	5.9531e-62	9.2249e-60	up
NSG1	chr4	4386532	4419058	protein_coding	neuronal vesicle trafficking associated 1	+	32527	224.465	2.36485	0.142424	16.6043	6.49181e-62	9.97921e-60	up
JPH3	chr16	87601835	87698156	protein_coding	junctophilin 3	+	96322	580.203	1.40222	0.0845794	16.5788	9.9267e-62	1.51382e-59	up
ESRRB	chr14	76310777	76501837	protein_coding	estrogen related receptor beta	+	191061	324.347	1.83251	0.110969	16.5137	2.92381e-61	4.4237e-59	up
SCAMP5	chr15	74995563	75021495	protein_coding	secretory carrier membrane protein 5	+	25933	656.569	1.32819	0.0807294	16.4524	8.06142e-61	1.21016e-58	up
IGSF10	chr3	151432432	151619925	protein_coding	immunoglobulin superfamily member 10	-	187494	194.779	2.60877	0.158669	16.4416	9.6393e-61	1.43581e-58	up
FBLN5	chr14	91869411	91947694	protein_coding	fibulin 5	-	78284	447.995	1.53247	0.0932948	16.4261	1.24502e-60	1.84024e-58	up
CDHR1	chr10	84194537	84219621	protein_coding	cadherin related family member 1	+	25085	304.399	1.88642	0.115295	16.3617	3.58682e-60	5.26112e-58	up
COL5A1	chr9	134641803	134844843	protein_coding	collagen type V alpha 1 chain	+	203041	838.259	1.2469	0.0763132	16.3393	5.18545e-60	7.54836e-58	up
CD9	chr12	6199946	6238266	protein_coding	CD9 molecule	+	38321	1032.21	1.08862	0.0666755	16.3271	6.33429e-60	9.15139e-58	up
PIANP	chr12	6692178	6700815	protein_coding	PILR alpha associated neural protein	-	8638	159.929	2.97998	0.18289	16.2938	1.09145e-59	1.56509e-57	up
EDNRB	chr13	77895481	77975527	protein_coding	endothelin receptor type B	-	80047	267.878	1.99254	0.12303	16.1956	5.41252e-59	7.64718e-57	up
SLIT3	chr5	168661740	169301139	protein_coding	slit guidance ligand 3	-	639400	234.487	2.21434	0.137158	16.1444	1.24305e-58	1.74345e-56	up
PROCR	chr20	35171096	35216259	protein_coding	protein C receptor	+	45164	458.932	1.56175	0.0970996	16.084	3.30598e-58	4.60322e-56	up
EML6	chr2	54723552	54972025	protein_coding	EMAP like 6	+	248474	372.297	1.63551	0.101874	16.0542	5.34185e-58	7.38444e-56	up
CAMKV	chr3	49857989	49869906	protein_coding	CaM kinase like vesicle associated	-	11918	880.928	1.1539	0.0721538	15.9923	1.44698e-57	1.97189e-55	up
SLC7A8	chr14	23125295	23183660	protein_coding	solute carrier family 7 member 8	-	58366	640.533	1.25088	0.0783351	15.9684	2.12261e-57	2.87226e-55	up
COL6A2	chr21	46098112	46132848	protein_coding	collagen type VI alpha 2 chain	+	34737	1344.44	1.02842	0.0645432	15.9338	3.69427e-57	4.96402e-55	up
PPP2R2C	chr4	6320581	6563799	protein_coding	protein phosphatase 2 regulatory subunit Bgamma	-	243219	149.341	3.00018	0.188553	15.9116	5.26189e-57	6.97291e-55	up
CORO1A	chr16	30183602	30189076	protein_coding	coronin 1A	+	5475	234.015	2.20301	0.138715	15.8815	8.50855e-57	1.11981e-54	up
CALCB	chr11	15073593	15078637	protein_coding	calcitonin related polypeptide beta	+	5045	397.008	1.57226	0.0991866	15.8516	1.37091e-56	1.79198e-54	up
NOTCH3	chr19	15159038	15200995	protein_coding	notch receptor 3	-	41958	1794.54	1.10197	0.0695651	15.8408	1.62719e-56	2.11259e-54	up
HOXD10	chr2	176116778	176119937	protein_coding	homeobox D10	+	3160	1180.29	-1.01559	0.0641725	-15.826	2.06031e-56	2.65697e-54	down
GALNT16	chr14	69259631	69386337	protein_coding	polypeptide N-acetylgalactosaminyltransferase 16	+	126707	612.973	1.2671	0.0800705	15.8248	2.09805e-56	2.6876e-54	up
CACNA2D2	chr3	50362613	50504244	protein_coding	calcium voltage-gated channel auxiliary subunit alpha2delta 2	-	141632	856.733	1.19011	0.0752175	15.8222	2.18693e-56	2.7829e-54	up
ALDH1A1	chr9	72900671	72953053	protein_coding	aldehyde dehydrogenase 1 family member A1	-	52383	135.632	3.38153	0.214142	15.7911	3.58242e-56	4.52869e-54	up
PREX1	chr20	48624252	48888185	protein_coding	phosphatidylinositol-3,4,5-trisphosphate dependent Rac exchange factor 1	-	263934	508.046	1.3709	0.087003	15.757	6.14991e-56	7.72357e-54	up
ARAP3	chr5	141653402	141682230	protein_coding	ArfGAP with RhoGAP domain, ankyrin repeat and PH domain 3	-	28829	179.351	2.52454	0.160529	15.7263	9.9821e-56	1.24549e-53	up
FBXO41	chr2	73254690	73284478	protein_coding	F-box protein 41	-	29789	582.53	1.39324	0.0887434	15.6997	1.52053e-55	1.88497e-53	up
HMCN1	chr1	185734391	186190949	protein_coding	hemicentin 1	+	456559	287.768	1.9059	0.121657	15.6661	2.57932e-55	3.17703e-53	up
FXYD6	chr11	117836981	117877430	protein_coding	FXYD domain containing ion transport regulator 6	-	40450	576.94	1.35152	0.086276	15.6651	2.61899e-55	3.20534e-53	up
CORO2A	chr9	98120975	98192637	protein_coding	coronin 2A	-	71663	426.599	1.4908	0.0953555	15.6342	4.26044e-55	5.18128e-53	up
TNNT1	chr19	55132698	55149206	protein_coding	troponin T1, slow skeletal type	-	16509	789.09	1.22351	0.0783934	15.6072	6.49877e-55	7.8537e-53	up
ITGA9	chr3	37452141	37823507	protein_coding	integrin subunit alpha 9	+	371367	216.734	2.20556	0.141465	15.5908	8.40738e-55	1.00967e-52	up
USH1C	chr11	17493900	17544416	protein_coding	USH1 protein network component harmonin	-	50517	256.703	1.96856	0.126337	15.5819	9.67011e-55	1.15411e-52	up
NGFR	chr17	49495293	49515008	protein_coding	nerve growth factor receptor	+	19716	134.325	3.41256	0.219162	15.571	1.14687e-54	1.36032e-52	up
PLPPR4	chr1	99262924	99309584	protein_coding	phospholipid phosphatase related 4	+	46661	151.841	2.92656	0.188281	15.5435	1.76e-54	2.07474e-52	up
FGFR4	chr5	177086915	177098144	protein_coding	fibroblast growth factor receptor 4	+	11230	1142.39	1.16018	0.0747885	15.5128	2.8422e-54	3.33005e-52	up
B4GALNT4	chr11	369499	382117	protein_coding	beta-1,4-N-acetyl-galactosaminyltransferase 4	+	12619	385.884	1.63584	0.105623	15.4875	4.21275e-54	4.90594e-52	up
COL5A2	chr2	189031898	189441111	protein_coding	collagen type V alpha 2 chain	-	409214	472.484	1.48723	0.096041	15.4854	4.35358e-54	5.0394e-52	up
LUM	chr12	91102629	91111494	protein_coding	lumican	-	8866	132.723	3.23413	0.208914	15.4807	4.68606e-54	5.39177e-52	up
KCNH3	chr12	49539030	49558337	protein_coding	potassium voltage-gated channel subfamily H member 3	+	19308	124.836	3.86118	0.250098	15.4387	8.99077e-54	1.02224e-51	up
NCAM1	chr11	112961420	113278436	protein_coding	neural cell adhesion molecule 1	+	317017	1206.97	1.04478	0.0677382	15.4238	1.13173e-53	1.27919e-51	up
FXYD5	chr19	35154735	35169881	protein_coding	FXYD domain containing ion transport regulator 5	+	15147	767.707	1.13029	0.0735148	15.375	2.40743e-53	2.70519e-51	up
SLC2A3	chr12	7919230	7936187	protein_coding	solute carrier family 2 member 3	-	16958	186.797	2.39337	0.15604	15.3381	4.25351e-53	4.72435e-51	up
SDC1	chr2	20200797	20225475	protein_coding	syndecan 1	-	24679	462.234	1.41733	0.0928458	15.2654	1.30061e-52	1.41996e-50	up
SLC4A8	chr12	51391446	51515763	protein_coding	solute carrier family 4 member 8	+	124318	235.769	2.18684	0.143424	15.2474	1.71274e-52	1.85934e-50	up
CLU	chr8	27596917	27614700	protein_coding	clusterin	-	17784	392.947	1.64602	0.108337	15.1935	3.90228e-52	4.21249e-50	up
CDH3	chr16	68645310	68733771	protein_coding	cadherin 3	+	88462	147.483	2.81564	0.18548	15.1803	4.77584e-52	5.12669e-50	up
ENPP2	chr8	119557086	119673390	protein_coding	ectonucleotide pyrophosphatase/phosphodiesterase 2	-	116305	314.053	1.69155	0.111457	15.1767	5.04156e-52	5.38186e-50	up
NYNRIN	chr14	24399003	24419283	protein_coding	NYN domain and retroviral integrase containing	+	20281	817.806	1.13903	0.0751446	15.1578	6.72847e-52	7.14296e-50	up
SYNPO	chr5	150586010	150659207	protein_coding	synaptopodin	+	73198	129.065	3.25586	0.215373	15.1174	1.24439e-51	1.31379e-49	up
ELFN2	chr22	37340644	37427479	protein_coding	extracellular leucine rich repeat and fibronectin type III domain containing 2	-	86836	230.513	2.03466	0.134739	15.1007	1.60159e-51	1.68167e-49	up
RASSF2	chr20	4780023	4823608	protein_coding	Ras association domain family member 2	-	43586	433.692	1.41533	0.0937384	15.0987	1.65102e-51	1.72415e-49	up
TACC2	chr10	121989163	122254542	protein_coding	transforming acidic coiled-coil containing protein 2	+	265380	496.887	1.45469	0.0964586	15.081	2.16018e-51	2.24367e-49	up
GRIP2	chr3	14489107	14603017	protein_coding	glutamate receptor interacting protein 2	-	113911	152.853	2.71047	0.179745	15.0795	2.2078e-51	2.2808e-49	up
KRT8	chr12	52897191	52949860	protein_coding	keratin 8	-	52670	690.667	1.34559	0.0897967	14.9849	9.22019e-51	9.47412e-49	up
NFATC4	chr14	24366911	24379604	protein_coding	nuclear factor of activated T cells 4	+	12694	536.963	1.42364	0.095018	14.9828	9.50576e-51	9.71559e-49	up
SGPP2	chr2	222423988	222562621	protein_coding	sphingosine-1-phosphate phosphatase 2	+	138634	216.222	2.0629	0.137715	14.9795	9.99654e-51	1.01631e-48	up
TGM2	chr20	38127385	38168475	protein_coding	transglutaminase 2	-	41091	193.032	2.23986	0.149692	14.9631	1.27948e-50	1.29396e-48	up
SLC30A3	chr2	27253684	27275817	protein_coding	solute carrier family 30 member 3	-	22134	189.439	2.30118	0.153902	14.9523	1.50516e-50	1.51422e-48	up
ADGRA2	chr8	37796883	37844896	protein_coding	adhesion G protein-coupled receptor A2	+	48014	724.519	1.15259	0.0772367	14.9228	2.34166e-50	2.31933e-48	up
SRCIN1	chr17	38530031	38607025	protein_coding	SRC kinase signaling inhibitor 1	-	76995	377.208	1.50443	0.101202	14.8656	5.511e-50	5.37532e-48	up
MYOF	chr10	93306429	93482334	protein_coding	myoferlin	-	175906	143.047	2.76543	0.186427	14.8338	8.856e-50	8.59434e-48	up
TSPAN18	chr11	44726310	44932423	protein_coding	tetraspanin 18	+	206114	710.279	1.12371	0.0759152	14.8021	1.41939e-49	1.37053e-47	up
CNTFR	chr9	34551433	34590852	protein_coding	ciliary neurotrophic factor receptor	-	39420	311.451	1.75361	0.118607	14.7851	1.82802e-49	1.75627e-47	up
PITPNM1	chr11	67491768	67506266	protein_coding	phosphatidylinositol transfer protein membrane associated 1	-	14499	747.39	1.14766	0.0777871	14.7539	2.90547e-49	2.76379e-47	up
CAMK1D	chr10	12349547	12835545	protein_coding	calcium/calmodulin dependent protein kinase ID	+	485999	363.239	1.49359	0.101525	14.7115	5.44164e-49	5.12554e-47	up
ADAM19	chr5	157477304	157575775	protein_coding	ADAM metallopeptidase domain 19	-	98472	536.368	1.25918	0.0857247	14.6887	7.61888e-49	7.14131e-47	up
ARNT2	chr15	80404382	80597933	protein_coding	aryl hydrocarbon receptor nuclear translocator 2	+	193552	824.127	1.08824	0.0741234	14.6814	8.48016e-49	7.91001e-47	up
AHNAK2	chr14	104937253	104978374	protein_coding	AHNAK nucleoprotein 2	-	41122	379.502	1.58619	0.108554	14.612	2.35456e-48	2.17514e-46	up
SLIT1	chr10	96998038	97185959	protein_coding	slit guidance ligand 1	-	187922	247.266	1.85281	0.127257	14.5596	5.07561e-48	4.64419e-46	up
NAV2	chr11	19345236	20121601	protein_coding	neuron navigator 2	+	776366	369.016	1.52732	0.104938	14.5545	5.46709e-48	4.97868e-46	up
TENM4	chr11	78652829	79441030	protein_coding	teneurin transmembrane protein 4	-	788202	254.696	1.86629	0.128983	14.4692	1.89643e-47	1.71886e-45	up
ENO2	chr12	6914580	6923697	protein_coding	enolase 2	+	9118	421.804	1.36612	0.0944855	14.4585	2.21517e-47	1.99833e-45	up
CRYBG1	chr6	106360717	106572017	protein_coding	crystallin beta-gamma domain containing 1	+	211301	150.416	2.64155	0.18287	14.4449	2.69858e-47	2.41178e-45	up
NPNT	chr4	105895471	105971671	protein_coding	nephronectin	+	76201	267.634	1.82058	0.126201	14.426	3.54869e-47	3.15686e-45	up
SFRP1	chr8	41261962	41309473	protein_coding	secreted frizzled related protein 1	-	47512	193.953	2.08331	0.144429	14.4244	3.63334e-47	3.21727e-45	up
ITGA7	chr12	55684568	55716400	protein_coding	integrin subunit alpha 7	-	31833	342.692	1.52487	0.105796	14.4134	4.26327e-47	3.75774e-45	up
EHD2	chr19	47713422	47743134	protein_coding	EH domain containing 2	+	29713	235.766	1.88881	0.131134	14.4037	4.90814e-47	4.28681e-45	up
MYORG	chr9	34366666	34376898	protein_coding	myogenesis regulating glycosidase (putative)	-	10233	663.947	1.12841	0.0786431	14.3485	1.08797e-46	9.37457e-45	up
SYNE1	chr6	152121687	152637362	protein_coding	spectrin repeat containing nuclear envelope protein 1	-	515676	605.22	1.15053	0.0804088	14.3086	1.93478e-46	1.64499e-44	up
TMEM132E	chr17	34579582	34639318	protein_coding	transmembrane protein 132E	+	59737	300.397	1.64835	0.115258	14.3014	2.14471e-46	1.81545e-44	up
HLA-DQB1	chr6	32659467	32666657	protein_coding	major histocompatibility complex, class II, DQ beta 1	-	7191	499.065	1.36424	0.0956157	14.268	3.46453e-46	2.91978e-44	up
ADAMTS7	chr15	78759206	78811464	protein_coding	ADAM metallopeptidase with thrombospondin type 1 motif 7	-	52259	216.75	2.01547	0.141732	14.2203	6.85715e-46	5.75372e-44	up
WSCD1	chr17	6069116	6124427	protein_coding	WSC domain containing 1	+	55312	558.745	1.17478	0.0826754	14.2095	7.99991e-46	6.6834e-44	up
PDE1B	chr12	54549601	54579239	protein_coding	phosphodiesterase 1B	+	29639	185.425	2.19845	0.15485	14.1973	9.5191e-46	7.85019e-44	up
RASD2	chr22	35532806	35553999	protein_coding	RASD family member 2	+	21194	123.491	2.97037	0.209219	14.1975	9.49916e-46	7.85019e-44	up
SLC25A29	chr14	100278567	100306444	protein_coding	solute carrier family 25 member 29	-	27878	701.009	1.0651	0.0750667	14.1887	1.07687e-45	8.84275e-44	up
MELTF	chr3	197001740	197029817	protein_coding	melanotransferrin	-	28078	353.955	1.46082	0.103558	14.1062	3.47675e-45	2.80697e-43	up
ABLIM3	chr5	149141493	149260542	protein_coding	actin binding LIM protein family member 3	+	119050	106.883	3.58632	0.254619	14.085	4.69369e-45	3.77361e-43	up
MTSS1	chr8	124550784	124728473	protein_coding	MTSS I-BAR domain containing 1	-	177690	286.062	1.63912	0.116404	14.0814	4.945e-45	3.95909e-43	up
ABCB1	chr7	87503017	87713295	protein_coding	ATP binding cassette subfamily B member 1	-	210279	545.174	1.28022	0.0909328	14.0787	5.13439e-45	4.09367e-43	up
RTN4RL2	chr11	57460528	57477534	protein_coding	reticulon 4 receptor like 2	+	17007	485.27	1.45254	0.103175	14.0784	5.15737e-45	4.09499e-43	up
FADS3	chr11	61873526	61892224	protein_coding	fatty acid desaturase 3	-	18699	353.985	1.43545	0.102187	14.0473	8.00668e-45	6.33121e-43	up
CHST9	chr18	26906481	27185308	protein_coding	carbohydrate sulfotransferase 9	-	278828	186.466	2.05564	0.146767	14.0062	1.42923e-44	1.12093e-42	up
NIBAN1	chr1	184791032	184974508	protein_coding	niban apoptosis regulator 1	-	183477	235.362	1.81638	0.129722	14.002	1.5146e-44	1.18305e-42	up
MEGF10	chr5	127229300	127461222	protein_coding	multiple EGF like domains 10	+	231923	118.795	2.96869	0.212564	13.9661	2.5087e-44	1.94374e-42	up
GSN	chr9	121201483	121332842	protein_coding	gelsolin	+	131360	691.151	1.1582	0.083174	13.9251	4.46049e-44	3.41468e-42	up
TMEM178B	chr7	141074064	141511296	protein_coding	transmembrane protein 178B	+	437233	615.337	1.1353	0.0815356	13.924	4.52818e-44	3.45274e-42	up
PRSS35	chr6	83512534	83525704	protein_coding	serine protease 35	+	13171	157.937	2.29583	0.165041	13.9107	5.45581e-44	4.14361e-42	up
KCNJ4	chr22	38426327	38455199	protein_coding	potassium inwardly rectifying channel subfamily J member 4	-	28873	140.625	2.48512	0.17901	13.8826	8.07943e-44	6.11206e-42	up
MEGF11	chr15	65895299	66253750	protein_coding	multiple EGF like domains 11	-	358452	255.984	1.66675	0.120827	13.7945	2.74953e-43	2.05573e-41	up
HOXB3	chr17	48548870	48590241	protein_coding	homeobox B3	-	41372	998.487	-1.00181	0.0726298	-13.7934	2.79326e-43	2.08033e-41	down
EBF4	chr20	2692780	2760108	protein_coding	EBF family member 4	+	67329	231.985	1.77754	0.128944	13.7853	3.1237e-43	2.31745e-41	up
CACNA1C	chr12	1970780	2697950	protein_coding	calcium voltage-gated channel subunit alpha1 C	+	727171	162.452	2.25624	0.164046	13.7537	4.84061e-43	3.55009e-41	up
MAST1	chr19	12838515	12874952	protein_coding	microtubule associated serine/threonine kinase 1	+	36438	345.908	1.45577	0.105943	13.7411	5.75896e-43	4.19161e-41	up
OBSCN	chr1	228208044	228378876	protein_coding	obscurin, cytoskeletal calmodulin and titin-interacting RhoGEF	+	170833	591.873	1.14801	0.0837914	13.7008	1.00454e-42	7.20233e-41	up
NTRK2	chr9	84668522	85027054	protein_coding	neurotrophic receptor tyrosine kinase 2	+	358533	117.581	2.97362	0.217623	13.6641	1.66328e-42	1.1881e-40	up
KIAA1217	chr10	23694727	24547843	protein_coding	KIAA1217	+	853117	213.151	1.86401	0.13648	13.6578	1.81354e-42	1.29063e-40	up
NGEF	chr2	232878701	233013256	protein_coding	neuronal guanine nucleotide exchange factor	-	134556	339.757	1.41701	0.103908	13.6372	2.40492e-42	1.70518e-40	up
RXRG	chr1	165400922	165445126	protein_coding	retinoid X receptor gamma	-	44205	162.39	2.2012	0.161422	13.6363	2.43662e-42	1.72131e-40	up
LBH	chr2	30231534	30260028	protein_coding	LBH regulator of WNT signaling pathway	+	28495	213.255	1.97779	0.145163	13.6246	2.85801e-42	2.0116e-40	up
GNG2	chr14	51826174	51969795	protein_coding	G protein subunit gamma 2	+	143622	163.157	2.26325	0.166146	13.622	2.96155e-42	2.07687e-40	up
ATF5	chr19	49928906	49933935	protein_coding	activating transcription factor 5	+	5030	277.51	-1.56109	0.11479	-13.5995	4.03135e-42	2.81682e-40	down
CDH23	chr10	71396920	71815947	protein_coding	cadherin related 23	+	419028	257.908	1.70774	0.125709	13.5848	4.92645e-42	3.42977e-40	up
DKK3	chr11	11963036	12009745	protein_coding	dickkopf WNT signaling pathway inhibitor 3	-	46710	168.026	2.16875	0.159771	13.5741	5.70462e-42	3.94296e-40	up
TRIB2	chr2	12716936	12742734	protein_coding	tribbles pseudokinase 2	+	25799	184.993	1.99809	0.147321	13.5629	6.64977e-42	4.57976e-40	up
SCD5	chr4	82629539	82798796	protein_coding	stearoyl-CoA desaturase 5	-	169258	371.115	1.37219	0.101733	13.4881	1.83654e-41	1.25584e-39	up
TMEFF2	chr2	191949046	192194933	protein_coding	transmembrane protein with EGF like and two follistatin like domains 2	-	245888	129.603	2.49207	0.185497	13.4345	3.79525e-41	2.54985e-39	up
SEMA3F	chr3	50155058	50189075	protein_coding	semaphorin 3F	+	34018	402.007	1.29655	0.096596	13.4224	4.46795e-41	2.98883e-39	up
UNC5A	chr5	176810559	176880898	protein_coding	unc-5 netrin receptor A	+	70340	132.876	2.51907	0.187679	13.4222	4.47974e-41	2.98883e-39	up
MGAT3	chr22	39457012	39492194	protein_coding	beta-1,4-mannosyl-glycoprotein 4-beta-N-acetylglucosaminyltransferase	+	35183	457.17	1.27363	0.0949016	13.4206	4.58265e-41	3.04691e-39	up
GDF7	chr2	20667144	20679243	protein_coding	growth differentiation factor 7	+	12100	433.109	1.25834	0.0939319	13.3963	6.35202e-41	4.20876e-39	up
HLA-DPB1	chr6	33075990	33089696	protein_coding	major histocompatibility complex, class II, DP beta 1	+	13707	130.598	2.45953	0.183637	13.3934	6.60802e-41	4.36334e-39	up
UPK1B	chr3	119173598	119205143	protein_coding	uroplakin 1B	+	31546	124.584	2.55033	0.190683	13.3747	8.49783e-41	5.59198e-39	up
NKD1	chr16	50548396	50649249	protein_coding	NKD inhibitor of WNT signaling pathway 1	+	100854	610.978	1.09873	0.0824946	13.3188	1.80002e-40	1.18046e-38	up
KALRN	chr3	124033369	124726325	protein_coding	kalirin RhoGEF kinase	+	692957	273.198	1.55041	0.116856	13.2677	3.56357e-40	2.32115e-38	up
DHRS2	chr14	23630115	23645639	protein_coding	dehydrogenase/reductase 2	+	15525	184.875	2.05684	0.155126	13.2591	3.99506e-40	2.59342e-38	up
KIFC2	chr8	144466049	144474202	protein_coding	kinesin family member C2	+	8154	577.253	1.21184	0.0914093	13.2573	4.09574e-40	2.64982e-38	up
PLEKHH2	chr2	43637260	43767987	protein_coding	pleckstrin homology, MyTH4 and FERM domain containing H2	+	130728	341.278	1.3704	0.103447	13.2474	4.67208e-40	3.01255e-38	up
NRP1	chr10	33177493	33334667	protein_coding	neuropilin 1	-	157175	554.624	-1.10683	0.0836101	-13.238	5.29064e-40	3.38865e-38	down
NRCAM	chr7	108147649	108456720	protein_coding	neuronal cell adhesion molecule	-	309072	598.454	1.0896	0.0823615	13.2295	5.92794e-40	3.7717e-38	up
PLEKHA6	chr1	204218853	204378168	protein_coding	pleckstrin homology domain containing A6	-	159316	154.162	2.13124	0.161648	13.1844	1.07847e-39	6.79434e-38	up
PLA2G4A	chr1	186828949	186988981	protein_coding	phospholipase A2 group IVA	+	160033	655.77	1.16031	0.0882007	13.1554	1.58478e-39	9.91908e-38	up
RET	chr10	43077069	43130351	protein_coding	ret proto-oncogene	+	53283	159.191	2.12392	0.162153	13.0982	3.37015e-39	2.08895e-37	up
SLC8A1	chr2	40097270	40512435	protein_coding	solute carrier family 8 member A1	-	415166	381.432	1.29594	0.0991657	13.0685	4.9861e-39	3.08064e-37	up
SHANK1	chr19	50659255	50719802	protein_coding	SH3 and multiple ankyrin repeat domains 1	-	60548	103.762	2.92797	0.224349	13.0509	6.27822e-39	3.86654e-37	up
CACNG4	chr17	66964707	67033398	protein_coding	calcium voltage-gated channel auxiliary subunit gamma 4	+	68692	90.3617	4.07386	0.31222	13.048	6.52042e-39	4.00287e-37	up
CACNG5	chr17	66835117	66894751	protein_coding	calcium voltage-gated channel auxiliary subunit gamma 5	+	59635	101.222	2.93532	0.225097	13.0403	7.22177e-39	4.41931e-37	up
PADI2	chr1	17066761	17119451	protein_coding	peptidyl arginine deiminase 2	-	52691	141.767	2.25017	0.172589	13.0377	7.47047e-39	4.54257e-37	up
ADAMTS2	chr5	179110853	179345461	protein_coding	ADAM metallopeptidase with thrombospondin type 1 motif 2	-	234609	279.668	1.49628	0.115144	12.9949	1.30748e-38	7.90037e-37	up
ARMH4	chr14	58000761	58152213	protein_coding	armadillo like helical domain containing 4	-	151453	292.168	1.4865	0.11443	12.9905	1.38454e-38	8.33977e-37	up
BMP6	chr6	7726099	7881728	protein_coding	bone morphogenetic protein 6	+	155630	382.559	1.27306	0.0981162	12.975	1.6959e-38	1.01516e-36	up
DCHS1	chr11	6621330	6655809	protein_coding	dachsous cadherin-related 1	-	34480	324.031	1.53633	0.118442	12.9712	1.78274e-38	1.06383e-36	up
C1QTNF1	chr17	79022934	79049788	protein_coding	C1q and TNF related 1	+	26855	124.228	2.43452	0.187851	12.9599	2.06561e-38	1.22881e-36	up
ILDR2	chr1	166908187	166975540	protein_coding	immunoglobulin like domain containing receptor 2	-	67354	373.987	1.29193	0.0998013	12.9451	2.50542e-38	1.48128e-36	up
TJP3	chr19	3708384	3750813	protein_coding	tight junction protein 3	+	42430	92.4184	3.22916	0.249564	12.9392	2.70535e-38	1.5897e-36	up
ATP8A1	chr4	42408373	42657105	protein_coding	ATPase phospholipid transporting 8A1	-	248733	657.746	1.03335	0.0800259	12.9127	3.81648e-38	2.23578e-36	up
AMBN	chr4	70592256	70607288	protein_coding	ameloblastin	+	15033	117.721	2.5213	0.195618	12.8889	5.19735e-38	3.02627e-36	up
PLXNC1	chr12	94148577	94307675	protein_coding	plexin C1	+	159099	93.7669	3.13081	0.243381	12.8638	7.19347e-38	4.15082e-36	up
HOXC9	chr12	54000161	54003337	protein_coding	homeobox C9	+	3177	486.087	-1.12918	0.087796	-12.8614	7.418e-38	4.25483e-36	down
FSTL4	chr5	133196455	133842067	protein_coding	follistatin like 4	-	645613	86.8502	3.55506	0.276709	12.8477	8.86587e-38	5.04017e-36	up
GPM6A	chr4	175632937	176002691	protein_coding	glycoprotein M6A	-	369755	213.16	1.77461	0.138534	12.8099	1.44337e-37	8.15714e-36	up
SLCO4C1	chr5	102233986	102296284	protein_coding	solute carrier organic anion transporter family member 4C1	-	62299	164.176	1.99928	0.156467	12.7777	2.18531e-37	1.2278e-35	up
EDIL3	chr5	83940554	84384880	protein_coding	EGF like repeats and discoidin domains 3	-	444327	233.561	1.71073	0.133905	12.7757	2.24099e-37	1.25541e-35	up
PKIB	chr6	122471921	122726373	protein_coding	cAMP-dependent protein kinase inhibitor beta	+	254453	210.598	1.71813	0.134521	12.7722	2.34488e-37	1.30979e-35	up
DCLK1	chr13	35768652	36131939	protein_coding	doublecortin like kinase 1	-	363288	183.657	1.852	0.145564	12.723	4.40707e-37	2.45455e-35	up
FRY	chr13	32031774	32299125	protein_coding	FRY microtubule binding protein	+	267352	265.785	1.49708	0.117752	12.7138	4.95402e-37	2.7512e-35	up
NOL4L	chr20	32443059	32585333	protein_coding	nucleolar protein 4 like	-	142275	335.288	1.3241	0.104566	12.6628	9.50093e-37	5.2611e-35	up
NRXN2	chr11	64606174	64723197	protein_coding	neurexin 2	-	117024	106.613	2.70949	0.214095	12.6555	1.04261e-36	5.75682e-35	up
LOC124901968	chr8	83912696	83971094	lncRNA	uncharacterized LOC124901968	+	58399	283.536	1.49963	0.118678	12.6361	1.3358e-36	7.35456e-35	up
ABAT	chr16	8674617	8784570	protein_coding	4-aminobutyrate aminotransferase	+	109954	375.549	1.25124	0.0992408	12.6081	1.90449e-36	1.04259e-34	up
KCNA2	chr1	110593580	110631440	protein_coding	potassium voltage-gated channel subfamily A member 2	-	37861	82.2997	4.28414	0.339995	12.6006	2.09567e-36	1.14399e-34	up
FLRT1	chr11	64035931	64119171	protein_coding	fibronectin leucine rich transmembrane protein 1	+	83241	109.036	2.55062	0.202822	12.5757	2.87272e-36	1.56372e-34	up
ACAN	chr15	88803436	88875353	protein_coding	aggrecan	+	71918	87.7088	3.31064	0.263262	12.5755	2.88132e-36	1.56397e-34	up
ANKRD34B	chr5	80556755	80570280	protein_coding	ankyrin repeat domain 34B	-	13526	164.473	1.93673	0.154368	12.5462	4.17234e-36	2.23319e-34	up
EGFR	chr7	55019017	55211628	protein_coding	epidermal growth factor receptor	+	192612	613.124	1.04768	0.0835377	12.5414	4.43259e-36	2.3659e-34	up
SLC22A17	chr14	23346311	23352887	protein_coding	solute carrier family 22 member 17	-	6577	318.894	1.45633	0.11634	12.5179	5.95868e-36	3.16288e-34	up
TMOD2	chr15	51751597	51816363	protein_coding	tropomodulin 2	+	64767	485.749	1.10418	0.0884884	12.4782	9.81974e-36	5.15537e-34	up
SYT17	chr16	19167834	19268332	protein_coding	synaptotagmin 17	+	100499	172.584	1.88067	0.150808	12.4706	1.07989e-35	5.654e-34	up
SNAP91	chr6	83552885	83709393	protein_coding	synaptosome associated protein 91	-	156509	162.413	1.90465	0.152734	12.4704	1.08297e-35	5.6547e-34	up
SCN4B	chr11	118133377	118152823	protein_coding	sodium voltage-gated channel beta subunit 4	-	19447	104.019	2.64647	0.212344	12.4631	1.18596e-35	6.17565e-34	up
GMPR	chr6	16238587	16295549	protein_coding	guanosine monophosphate reductase	+	56963	205.715	1.72204	0.138201	12.4604	1.22764e-35	6.37542e-34	up
GAS1	chr9	86944362	86947506	protein_coding	growth arrest specific 1	-	3145	759.477	-1.12074	0.0902146	-12.423	1.96043e-35	1.01263e-33	down
GAS7	chr17	9910606	10198606	protein_coding	growth arrest specific 7	-	288001	316.145	1.34533	0.108293	12.423	1.96017e-35	1.01263e-33	up
ACHE	chr7	100889994	100896994	protein_coding	acetylcholinesterase (Cartwright blood group)	-	7001	97.2504	2.82204	0.228318	12.3601	4.2936e-35	2.20592e-33	up
SYT9	chr11	7238778	7469043	protein_coding	synaptotagmin 9	+	230266	122.15	2.27139	0.18378	12.3593	4.3393e-35	2.22346e-33	up
HOXB8	chr17	48612346	48615292	protein_coding	homeobox B8	-	2947	436.509	-1.15964	0.0938312	-12.3588	4.36816e-35	2.23229e-33	down
AMPH	chr7	38383704	38631373	protein_coding	amphiphysin	-	247670	512.748	1.11953	0.0906316	12.3525	4.72204e-35	2.40674e-33	up
RIMS3	chr1	40620680	40692066	protein_coding	regulating synaptic membrane exocytosis 3	-	71387	603.984	1.00083	0.0814525	12.2873	1.0599e-34	5.30365e-33	up
CREB3L1	chr11	46277662	46321409	protein_coding	cAMP responsive element binding protein 3 like 1	+	43748	133.553	2.14469	0.174884	12.2635	1.4226e-34	7.06337e-33	up
KCNS3	chr2	17877847	17932958	protein_coding	potassium voltage-gated channel modifier subfamily S member 3	+	55112	104.847	2.61892	0.213671	12.2568	1.54476e-34	7.65013e-33	up
MIAT	chr22	26657482	26676478	lncRNA	myocardial infarction associated transcript	+	18997	98.22	2.69925	0.220325	12.2512	1.65457e-34	8.17291e-33	up
KCNN1	chr19	17951290	18000085	protein_coding	potassium calcium-activated channel subfamily N member 1	+	48796	184.868	1.74632	0.142658	12.2413	1.86956e-34	9.2112e-33	up
TMEM108	chr3	133038391	133397775	protein_coding	transmembrane protein 108	+	359385	311.567	1.38048	0.11317	12.1983	3.17241e-34	1.54715e-32	up
RTN4RL1	chr17	1934677	2025334	protein_coding	reticulon 4 receptor like 1	-	90658	190.644	1.72163	0.141195	12.1933	3.37598e-34	1.64227e-32	up
ABCG1	chr21	42199689	42297244	protein_coding	ATP binding cassette subfamily G member 1	+	97556	122.006	2.26857	0.187132	12.1229	7.99292e-34	3.8589e-32	up
SORBS1	chr10	95311773	95561371	protein_coding	sorbin and SH3 domain containing 1	-	249599	350.604	1.23626	0.102037	12.1158	8.71143e-34	4.19524e-32	up
PCDH20	chr13	61409685	61415849	protein_coding	protocadherin 20	-	6165	345.133	1.22142	0.101407	12.0447	2.06768e-33	9.90786e-32	up
ITGA3	chr17	50056110	50090481	protein_coding	integrin subunit alpha 3	+	34372	352.26	1.24656	0.103527	12.0409	2.16535e-33	1.03501e-31	up
PIK3R5	chr17	8878916	8965707	protein_coding	phosphoinositide-3-kinase regulatory subunit 5	-	86792	99.1391	2.69367	0.223734	12.0396	2.19919e-33	1.04857e-31	up
ZNF503-AS2	chr10	75401528	75408982	lncRNA	ZNF503 antisense RNA 2	+	7455	456.902	-1.06953	0.088948	-12.0242	2.65022e-33	1.2605e-31	down
SHANK2	chr11	70467854	71253228	protein_coding	SH3 and multiple ankyrin repeat domains 2	-	785375	103.637	2.48382	0.207077	11.9947	3.78966e-33	1.78915e-31	up
CAV1	chr7	116525009	116561185	protein_coding	caveolin 1	+	36177	307.105	1.28724	0.107412	11.9841	4.3068e-33	2.02831e-31	up
PAQR8	chr6	52362151	52407777	protein_coding	progestin and adipoQ receptor family member 8	+	45627	489.286	1.05356	0.088029	11.9684	5.20373e-33	2.44474e-31	up
STAT4	chr2	191029576	191246175	protein_coding	signal transducer and activator of transcription 4	-	216600	154.906	1.88474	0.15776	11.9469	6.73956e-33	3.15855e-31	up
LSAMP	chr3	115802374	116445487	protein_coding	limbic system associated membrane protein	-	643114	102.373	2.51962	0.211199	11.9301	8.24967e-33	3.84751e-31	up
HSPG2	chr1	21822244	21937310	protein_coding	heparan sulfate proteoglycan 2	-	115067	392.083	1.24908	0.105481	11.8418	2.37394e-32	1.09127e-30	up
RGS4	chr1	163068871	163076802	protein_coding	regulator of G protein signaling 4	+	7932	83.6701	2.97572	0.25258	11.7813	4.87592e-32	2.21491e-30	up
TFCP2L1	chr2	121216587	121285202	protein_coding	transcription factor CP2 like 1	-	68616	325.049	1.23811	0.105262	11.7621	6.11647e-32	2.77189e-30	up
SLC6A1	chr3	10992748	11039247	protein_coding	solute carrier family 6 member 1	+	46500	72.5603	3.53427	0.300524	11.7604	6.24655e-32	2.82418e-30	up
SEPTIN4	chr17	58520256	58544328	protein_coding	septin 4	-	24073	124.292	2.09432	0.178671	11.7217	9.86744e-32	4.42998e-30	up
MMP17	chr12	131828393	131851771	protein_coding	matrix metallopeptidase 17	+	23379	223.469	1.54257	0.131809	11.7031	1.22939e-31	5.48091e-30	up
CRYM	chr16	21258521	21303062	protein_coding	crystallin mu	-	44542	116.488	2.17356	0.18645	11.6576	2.09875e-31	9.24943e-30	up
RIMS2	chr8	103500610	104256094	protein_coding	regulating synaptic membrane exocytosis 2	+	755485	77.0211	3.10235	0.266552	11.6388	2.61593e-31	1.15023e-29	up
MFSD4A	chr1	205569014	205602918	protein_coding	major facilitator superfamily domain containing 4A	+	33905	102.397	2.40733	0.207408	11.6067	3.80827e-31	1.66688e-29	up
CRTAC1	chr10	97865000	98030621	protein_coding	cartilage acidic protein 1	-	165622	79.9681	2.96422	0.255428	11.6049	3.89079e-31	1.69913e-29	up
COL21A1	chr6	56056590	56394128	protein_coding	collagen type XXI alpha 1 chain	-	337539	81.2796	2.86985	0.247732	11.5845	4.93924e-31	2.14723e-29	up
DPP4	chr2	161992245	162074215	protein_coding	dipeptidyl peptidase 4	-	81971	91.2222	2.59917	0.224437	11.5809	5.15223e-31	2.23477e-29	up
EGFLAM	chr5	38258559	38465480	protein_coding	EGF like, fibronectin type III and laminin G domains	+	206922	176.786	1.7651	0.152439	11.579	5.26356e-31	2.27791e-29	up
TUBB3	chr16	89921925	89936097	protein_coding	tubulin beta 3 class III	+	14173	289.564	1.35133	0.116713	11.5783	5.3113e-31	2.29341e-29	up
TNS1	chr2	217799791	218033982	protein_coding	tensin 1	-	234192	226.152	1.45545	0.125725	11.5764	5.42582e-31	2.33237e-29	up
CYP4F22	chr19	15508525	15552317	protein_coding	cytochrome P450 family 4 subfamily F member 22	+	43793	80.275	3.0668	0.265295	11.56	6.57348e-31	2.81313e-29	up
RELL2	chr5	141636997	141641064	protein_coding	RELT like 2	+	4068	395.649	1.14645	0.0991977	11.5573	6.78325e-31	2.89645e-29	up
SOX21-AS1	chr13	94712716	94715945	lncRNA	SOX21 antisense divergent transcript 1	+	3230	208.208	1.50892	0.130756	11.54	8.29307e-31	3.53329e-29	up
DOC2A	chr16	30005514	30023228	protein_coding	double C2 domain alpha	-	17715	229.648	1.42969	0.124123	11.5184	1.06609e-30	4.52207e-29	up
RASGRF1	chr15	78959906	79090780	protein_coding	Ras protein specific guanine nucleotide releasing factor 1	-	130875	70.9926	4.7058	0.408652	11.5154	1.10345e-30	4.6702e-29	up
PALM	chr19	708935	748329	protein_coding	paralemmin	+	39395	557.11	1.10268	0.0958832	11.5002	1.31574e-30	5.54428e-29	up
CARMIL3	chr14	24052009	24069729	protein_coding	capping protein regulator and myosin 1 linker 3	+	17721	107.75	2.36929	0.206476	11.4749	1.76381e-30	7.3838e-29	up
FAM78A	chr9	131258078	131281045	protein_coding	family with sequence similarity 78 member A	-	22968	268.656	1.31041	0.114362	11.4584	2.13386e-30	8.87491e-29	up
OLFML2A	chr9	124777133	124814882	protein_coding	olfactomedin like 2A	+	37750	85.0863	2.72421	0.238074	11.4427	2.55792e-30	1.05927e-28	up
CSPG4	chr15	75674322	75713466	protein_coding	chondroitin sulfate proteoglycan 4	-	39145	209.708	1.5416	0.135095	11.4112	3.67419e-30	1.51501e-28	up
SLC29A4	chr7	5282943	5306912	protein_coding	solute carrier family 29 member 4	+	23970	432.049	1.18814	0.104324	11.389	4.74588e-30	1.94439e-28	up
FBXL16	chr16	692500	705801	protein_coding	F-box and leucine rich repeat protein 16	-	13302	93.2272	2.50342	0.220161	11.3708	5.84353e-30	2.38394e-28	up
KDR	chr4	55078481	55125595	protein_coding	kinase insert domain receptor	-	47115	73.1649	3.24299	0.285621	11.3542	7.07172e-30	2.86673e-28	up
SYT6	chr1	114089292	114153869	protein_coding	synaptotagmin 6	-	64578	112.749	2.23689	0.197163	11.3454	7.81944e-30	3.16317e-28	up
VDR	chr12	47841537	47904994	protein_coding	vitamin D receptor	-	63458	374.527	1.13102	0.0997408	11.3396	8.35236e-30	3.37165e-28	up
WNT3A	chr1	228006998	228061271	protein_coding	Wnt family member 3A	+	54274	100.81	2.57577	0.227429	11.3256	9.80322e-30	3.93254e-28	up
RIPOR2	chr6	24804284	25042168	protein_coding	RHO family interacting cell polarization regulator 2	-	237885	68.7668	3.45085	0.305507	11.2955	1.38168e-29	5.50808e-28	up
EMP3	chr19	48325552	48330553	protein_coding	epithelial membrane protein 3	+	5002	208.361	1.51001	0.133756	11.2893	1.48256e-29	5.898e-28	up
GJB2	chr13	20187470	20192938	protein_coding	gap junction protein beta 2	-	5469	103.857	2.25541	0.200208	11.2653	1.94599e-29	7.70974e-28	up
NAB2	chr12	57089114	57095476	protein_coding	NGFI-A binding protein 2	+	6363	435.082	1.08589	0.0966168	11.2391	2.61932e-29	1.02925e-27	up
IL6R	chr1	154405343	154469450	protein_coding	interleukin 6 receptor	+	64108	190.95	1.57257	0.139925	11.2387	2.63223e-29	1.03221e-27	up
A4GALT	chr22	42692121	42721301	protein_coding	alpha 1,4-galactosyltransferase (P blood group)	-	29181	147.602	1.78621	0.158965	11.2365	2.7001e-29	1.05667e-27	up
ELFN1	chr7	1666064	1747946	protein_coding	extracellular leucine rich repeat and fibronectin type III domain containing 1	+	81883	97.217	2.35499	0.210366	11.1947	4.32833e-29	1.67679e-27	up
DNAH11	chr7	21543039	21901839	protein_coding	dynein axonemal heavy chain 11	+	358801	211.148	1.44343	0.128983	11.1908	4.5223e-29	1.7449e-27	up
SECTM1	chr17	82321024	82333959	protein_coding	secreted and transmembrane 1	-	12936	77.9394	2.86165	0.25622	11.1687	5.7998e-29	2.21557e-27	up
GREM2	chr1	240489573	240612155	protein_coding	gremlin 2, DAN family BMP antagonist	-	122583	67.6795	3.33237	0.298991	11.1454	7.54425e-29	2.86488e-27	up
CLMN	chr14	95181940	95319908	protein_coding	calmin	-	137969	422.227	1.10715	0.0994342	11.1345	8.52477e-29	3.22448e-27	up
SYT11	chr1	155859567	155885199	protein_coding	synaptotagmin 11	+	25633	116.755	2.07765	0.186676	11.1297	8.99637e-29	3.39618e-27	up
ANO4	chr12	100717261	101128641	protein_coding	anoctamin 4	+	411381	146.386	1.86004	0.167221	11.1232	9.66938e-29	3.64308e-27	up
CCBE1	chr18	59430939	59697721	protein_coding	collagen and calcium binding EGF domains 1	-	266783	122.693	1.96789	0.177282	11.1003	1.24979e-28	4.69956e-27	up
MMP15	chr16	58025754	58046901	protein_coding	matrix metallopeptidase 15	+	21148	379.276	1.12643	0.101605	11.0864	1.4612e-28	5.47308e-27	up
GAL3ST1	chr22	30554635	30574665	protein_coding	galactose-3-O-sulfotransferase 1	-	20031	75.6613	2.87478	0.259328	11.0855	1.47488e-28	5.51358e-27	up
FOXN4	chr12	109277978	109309284	protein_coding	forkhead box N4	-	31307	243.096	1.37217	0.123869	11.0776	1.61165e-28	6.00151e-27	up
EPHB1	chr3	134795260	135260467	protein_coding	EPH receptor B1	+	465208	184.535	1.52804	0.138277	11.0506	2.17749e-28	8.07731e-27	up
LRRC4B	chr19	50516892	50568435	protein_coding	leucine rich repeat containing 4B	-	51544	259.947	1.33277	0.12069	11.0429	2.37315e-28	8.7524e-27	up
ETS1	chr11	128458765	128587558	protein_coding	ETS proto-oncogene 1, transcription factor	-	128794	271.265	1.27563	0.115538	11.0407	2.43103e-28	8.94872e-27	up
TMEM54	chr1	32894595	32901389	protein_coding	transmembrane protein 54	-	6795	355.784	1.23451	0.11183	11.0391	2.47398e-28	9.08929e-27	up
CCDC69	chr5	151181052	151224092	protein_coding	coiled-coil domain containing 69	-	43041	484.136	1.03394	0.0938731	11.0143	3.26238e-28	1.19176e-26	up
PIK3CD	chr1	9627258	9729114	protein_coding	phosphatidylinositol-4,5-bisphosphate 3-kinase catalytic subunit delta	+	101857	188.045	1.55015	0.140764	11.0124	3.33006e-28	1.21418e-26	up
OPTN	chr10	13100082	13138308	protein_coding	optineurin	+	38227	322.965	1.20644	0.109718	10.9958	4.00155e-28	1.45624e-26	up
ANKRD29	chr18	23598926	23662911	protein_coding	ankyrin repeat domain 29	-	63986	159.821	1.67645	0.152553	10.9893	4.30237e-28	1.56276e-26	up
HID1	chr17	74950742	74972759	protein_coding	HID1 domain containing	-	22018	320.249	1.19715	0.109022	10.9809	4.72442e-28	1.71282e-26	up
STXBP6	chr14	24809454	25050147	protein_coding	syntaxin binding protein 6	-	240694	180.132	1.53929	0.140336	10.9686	5.40768e-28	1.9495e-26	up
APBA1	chr9	69427532	69673013	protein_coding	amyloid beta precursor protein binding family A member 1	-	245482	130.265	1.87225	0.170728	10.9662	5.55377e-28	1.99842e-26	up
MUC3A	chr7	100949534	100968347	protein_coding	mucin 3A, cell surface associated	+	18814	70.7012	2.96304	0.270209	10.9658	5.58263e-28	2.00505e-26	up
DAB1	chr1	56994778	58546726	protein_coding	DAB adaptor protein 1	-	1551949	65.9294	3.4811	0.317566	10.9618	5.83239e-28	2.09085e-26	up
LEPR	chr1	65420652	65641559	protein_coding	leptin receptor	+	220908	389.081	1.07453	0.0981055	10.9528	6.43999e-28	2.30437e-26	up
BLVRB	chr19	40447768	40465745	protein_coding	biliverdin reductase B	-	17978	501.155	1.0346	0.0945223	10.9456	6.97429e-28	2.48629e-26	up
MAPRE3	chr2	26970637	27027219	protein_coding	microtubule associated protein RP/EB family member 3	+	56583	405.52	1.05099	0.0960453	10.9426	7.21066e-28	2.55632e-26	up
HOXB2	chr17	48542655	48545109	protein_coding	homeobox B2	-	2455	210.766	-1.41593	0.129455	-10.9376	7.62024e-28	2.69655e-26	down
KNDC1	chr10	133160219	133226412	protein_coding	kinase non-catalytic C-lobe domain containing 1	+	66194	173.657	1.59693	0.146175	10.9248	8.77356e-28	3.09328e-26	up
CRMA	chr20	62543070	62551561	lncRNA	cardiomyocyte maturation associated lncRNA	-	8492	63.647	3.89134	0.356527	10.9146	9.82008e-28	3.44959e-26	up
LAMA2	chr6	128883138	129516566	protein_coding	laminin subunit alpha 2	+	633429	145.446	1.87807	0.17211	10.9121	1.00949e-27	3.53967e-26	up
FCHO1	chr19	17747744	17788561	protein_coding	FCH and mu domain containing endocytic adaptor 1	+	40818	224.066	1.40262	0.128764	10.893	1.24507e-27	4.33405e-26	up
SLC8A2	chr19	47428017	47471893	protein_coding	solute carrier family 8 member A2	-	43877	69.2241	3.03801	0.278945	10.8911	1.27109e-27	4.41662e-26	up
CLIP2	chr7	74289407	74405935	protein_coding	CAP-Gly domain containing linker protein 2	+	116529	261.045	1.26999	0.116839	10.8696	1.60894e-27	5.5704e-26	up
LMOD1	chr1	201896456	201946548	protein_coding	leiomodin 1	-	50093	197.347	1.44846	0.133443	10.8545	1.89861e-27	6.56148e-26	up
SOX21	chr13	94709622	94712545	protein_coding	SRY-box transcription factor 21	-	2924	156.62	1.6474	0.152038	10.8354	2.3384e-27	8.06685e-26	up
OAS3	chr12	112938474	112973251	protein_coding	2'-5'-oligoadenylate synthetase 3	+	34778	89.9669	2.35932	0.217803	10.8324	2.41819e-27	8.32715e-26	up
CLVS2	chr6	122996235	123072925	protein_coding	clavesin 2	+	76691	109.566	2.05052	0.189312	10.8314	2.44344e-27	8.39904e-26	up
GIPR	chr19	45668221	45683722	protein_coding	gastric inhibitory polypeptide receptor	+	15502	90.1305	2.36233	0.218637	10.8048	3.26644e-27	1.1208e-25	up
TLE2	chr19	2997644	3047635	protein_coding	TLE family member 2, transcriptional corepressor	-	49992	168.448	1.60249	0.148337	10.803	3.33005e-27	1.14059e-25	up
CHRD	chr3	184380054	184390739	protein_coding	chordin	+	10686	125.378	1.88403	0.174516	10.7958	3.60421e-27	1.23229e-25	up
SPP1	chr4	87975714	87983411	protein_coding	secreted phosphoprotein 1	+	7698	61.1941	4.48305	0.415329	10.794	3.67475e-27	1.25196e-25	up
MFSD6	chr2	190407576	190502314	protein_coding	major facilitator superfamily domain containing 6	+	94739	177.383	1.53182	0.141979	10.7891	3.87682e-27	1.31613e-25	up
ICAM5	chr19	10289952	10296778	protein_coding	intercellular adhesion molecule 5	+	6827	227.074	1.4414	0.13399	10.7575	5.46263e-27	1.84148e-25	up
EGFL7	chr9	136658856	136672678	protein_coding	EGF like domain multiple 7	+	13823	403.177	1.05597	0.0982919	10.7432	6.37616e-27	2.13446e-25	up
PIK3AP1	chr10	96593315	96720514	protein_coding	phosphoinositide-3-kinase adaptor protein 1	-	127200	212.654	1.38541	0.129284	10.716	8.561e-27	2.8559e-25	up
COL12A1	chr6	75084326	75206053	protein_coding	collagen type XII alpha 1 chain	-	121728	69.8857	3.09165	0.288673	10.7099	9.14995e-27	3.04708e-25	up
C1R	chr12	7080219	7092445	protein_coding	complement C1r	-	12227	155.944	1.74533	0.163083	10.7021	9.95207e-27	3.30846e-25	up
SPNS2	chr17	4498881	4539035	protein_coding	SPNS lysolipid transporter 2, sphingosine-1-phosphate	+	40155	76.3274	2.62406	0.245772	10.6768	1.30665e-26	4.30657e-25	up
MYRF	chr11	61752636	61788518	protein_coding	myelin regulatory factor	+	35883	336.794	1.12871	0.10578	10.6703	1.40111e-26	4.60997e-25	up
TRERF1	chr6	42224931	42452224	protein_coding	transcriptional regulating factor 1	-	227294	325.757	1.13763	0.106672	10.6648	1.48703e-26	4.88431e-25	up
NPAS1	chr19	47019837	47045775	protein_coding	neuronal PAS domain protein 1	+	25939	430.397	1.04973	0.0985389	10.6529	1.68988e-26	5.53168e-25	up
ADGRB1	chr8	142449649	142545007	protein_coding	adhesion G protein-coupled receptor B1	+	95359	103.164	2.14293	0.201235	10.6489	1.76456e-26	5.72737e-25	up
NT5E	chr6	85450083	85495784	protein_coding	5'-nucleotidase ecto	+	45702	63.2918	3.17989	0.299287	10.6249	2.2829e-26	7.37241e-25	up
HS6ST3	chr13	96090107	96839562	protein_coding	heparan sulfate 6-O-sulfotransferase 3	+	749456	298.288	1.1521	0.108508	10.6177	2.46607e-26	7.9506e-25	up
CDYL2	chr16	80597907	80805037	protein_coding	chromodomain Y like 2	-	207131	74.2342	2.63304	0.248598	10.5916	3.26016e-26	1.04407e-24	up
CHRNA3	chr15	78593052	78620996	protein_coding	cholinergic receptor nicotinic alpha 3 subunit	-	27945	135.791	1.74091	0.164532	10.581	3.64949e-26	1.16487e-24	up
RTBDN	chr19	12825482	12835428	protein_coding	retbindin	-	9947	62.2293	4.97193	0.469905	10.5807	3.66175e-26	1.16607e-24	up
RCAN2	chr6	46220736	46491970	protein_coding	regulator of calcineurin 2	-	271235	119.178	2.00504	0.189718	10.5685	4.16988e-26	1.32e-24	up
HOXA6	chr7	27145396	27147774	protein_coding	homeobox A6	-	2379	454.741	-1.02126	0.096797	-10.5505	5.05299e-26	1.59169e-24	down
MGLL	chr3	127689066	127823185	protein_coding	monoglyceride lipase	-	134120	149.513	1.70561	0.161987	10.5293	6.32992e-26	1.98741e-24	up
DACT3	chr19	46647551	46661182	protein_coding	dishevelled binding antagonist of beta catenin 3	-	13632	132.684	1.7406	0.165547	10.5142	7.42852e-26	2.31719e-24	up
DLGAP3	chr1	34865436	34929650	protein_coding	DLG associated protein 3	-	64215	62.791	3.12427	0.297517	10.5011	8.53589e-26	2.64971e-24	up
LOC124909489	chr3	43999332	44122364	lncRNA	uncharacterized LOC124909489	+	123033	109.803	2.0236	0.192764	10.4978	8.84273e-26	2.74053e-24	up
GPR85	chr7	113082285	113087724	protein_coding	G protein-coupled receptor 85	-	5440	102.082	2.09251	0.199342	10.4971	8.90925e-26	2.7567e-24	up
ABCC8	chr11	17392498	17476845	protein_coding	ATP binding cassette subfamily C member 8	-	84348	124.038	1.80534	0.172403	10.4717	1.16577e-25	3.58403e-24	up
MICAL1	chr6	109444062	109465968	protein_coding	microtubule associated monooxygenase, calponin and LIM domain containing 1	-	21907	300.088	1.18809	0.113802	10.44	1.6283e-25	4.95843e-24	up
RASGRP2	chr11	64726911	64745456	protein_coding	RAS guanyl releasing protein 2	-	18546	80.9114	2.46574	0.236801	10.4127	2.16999e-25	6.57671e-24	up
GALNT5	chr2	157257705	157318491	protein_coding	polypeptide N-acetylgalactosaminyltransferase 5	+	60787	97.5605	2.17937	0.209349	10.4102	2.22703e-25	6.73896e-24	up
SELENOP	chr5	42799880	42811892	protein_coding	selenoprotein P	-	12013	362.703	1.06291	0.102317	10.3884	2.80079e-25	8.46182e-24	up
PDE2A	chr11	72576141	72674422	protein_coding	phosphodiesterase 2A	-	98282	64.4759	2.96122	0.285272	10.3803	3.04691e-25	9.17654e-24	up
MDGA1	chr6	37630679	37697883	protein_coding	MAM domain containing glycosylphosphatidylinositol anchor 1	-	67205	273.153	1.22373	0.118022	10.3686	3.44366e-25	1.03068e-23	up
RASAL1	chr12	113099278	113136756	protein_coding	RAS protein activator like 1	-	37479	60.4306	3.10642	0.299629	10.3676	3.48233e-25	1.04064e-23	up
ATP2A3	chr17	3923873	3964437	protein_coding	ATPase sarcoplasmic/endoplasmic reticulum Ca2+ transporting 3	-	40565	234.787	1.28131	0.123629	10.3641	3.60995e-25	1.07674e-23	up
NEURL1	chr10	103493705	103592546	protein_coding	neuralized E3 ubiquitin protein ligase 1	+	98842	79.1389	2.52711	0.243835	10.364	3.61436e-25	1.07674e-23	up
SYTL2	chr11	85694229	85854870	protein_coding	synaptotagmin like 2	-	160642	89.3092	2.20749	0.213263	10.351	4.14032e-25	1.23152e-23	up
CACNA1B	chr9	137877782	138124619	protein_coding	calcium voltage-gated channel subunit alpha1 B	+	246838	143.675	1.64754	0.159438	10.3334	4.97785e-25	1.4738e-23	up
POLE4	chr2	74958643	74970128	protein_coding	DNA polymerase epsilon 4, accessory subunit	+	11486	401.691	-1.0005	0.0969454	-10.3202	5.70773e-25	1.68729e-23	down
CHST2	chr3	143119771	143124014	protein_coding	carbohydrate sulfotransferase 2	+	4244	299.177	1.17874	0.11451	10.2938	7.51204e-25	2.19701e-23	up
SMTNL2	chr17	4584007	4608319	protein_coding	smoothelin like 2	+	24313	132.426	1.7153	0.166817	10.2825	8.45057e-25	2.46775e-23	up
ZFHX2	chr14	23520857	23555952	protein_coding	zinc finger homeobox 2	-	35096	260.877	1.18152	0.114934	10.28	8.67077e-25	2.52821e-23	up
PAX2	chr10	100735396	100829944	protein_coding	paired box 2	+	94549	84.7767	2.23586	0.217896	10.2611	1.05453e-24	3.07012e-23	up
TPPP3	chr16	67389809	67393498	protein_coding	tubulin polymerization promoting protein family member 3	-	3690	109.909	1.89966	0.185389	10.2469	1.22225e-24	3.54765e-23	up
LPL	chr8	19939253	19967259	protein_coding	lipoprotein lipase	+	28007	100.939	2.00855	0.196153	10.2397	1.31677e-24	3.81626e-23	up
MME	chr3	155024202	155183729	protein_coding	membrane metalloendopeptidase	+	159528	155.259	1.59478	0.155785	10.237	1.35344e-24	3.91662e-23	up
CLDN1	chr3	190305707	190322446	protein_coding	claudin 1	-	16740	81.5516	2.55092	0.249404	10.2281	1.48405e-24	4.28168e-23	up
UGT3A2	chr5	36035021	36066882	protein_coding	UDP glycosyltransferase family 3 member A2	-	31862	220.405	1.28542	0.125723	10.2242	1.54484e-24	4.45038e-23	up
ASPHD2	chr22	26429260	26445015	protein_coding	aspartate beta-hydroxylase domain containing 2	+	15756	319.681	1.06116	0.104027	10.2008	1.96692e-24	5.64094e-23	up
HAGLR	chr2	176173189	176188958	lncRNA	HOXD antisense growth-associated long non-coding RNA	-	15770	323.17	1.10122	0.108201	10.1775	2.49793e-24	7.1319e-23	up
SLC17A7	chr19	49429401	49441527	protein_coding	solute carrier family 17 member 7	-	12127	96.3008	2.10561	0.20692	10.176	2.53891e-24	7.23816e-23	up
PHF21B	chr22	44881162	45010005	protein_coding	PHD finger protein 21B	-	128844	308.651	1.08182	0.106339	10.1733	2.60785e-24	7.42368e-23	up
PGM5	chr9	68356611	68531061	protein_coding	phosphoglucomutase 5	+	174451	103.666	1.98039	0.19483	10.1647	2.84945e-24	8.08746e-23	up
INSYN2B	chr5	169861303	169980495	protein_coding	inhibitory synaptic factor family member 2B	-	119193	52.4217	3.88715	0.382425	10.1645	2.85633e-24	8.09505e-23	up
AQP3	chr9	33441160	33447593	protein_coding	aquaporin 3 (Gill blood group)	-	6434	109.596	1.88023	0.185219	10.1514	3.2668e-24	9.2311e-23	up
STX1B	chr16	30989256	31010638	protein_coding	syntaxin 1B	-	21383	60.8271	2.94544	0.290581	10.1364	3.80903e-24	1.07318e-22	up
ALPL	chr1	21508984	21578410	protein_coding	alkaline phosphatase, biomineralization associated	+	69427	167.096	1.48406	0.146588	10.124	4.32529e-24	1.21506e-22	up
UBASH3B	chr11	122655722	122814473	protein_coding	ubiquitin associated and SH3 domain containing B	+	158752	278.401	1.12497	0.111503	10.0892	6.16741e-24	1.71749e-22	up
ECEL1	chr2	232479827	232487834	protein_coding	endothelin converting enzyme like 1	-	8008	230.48	1.22684	0.121619	10.0876	6.2699e-24	1.7435e-22	up
CXCR4	chr2	136114349	136118149	protein_coding	C-X-C motif chemokine receptor 4	-	3801	251.437	1.18834	0.117989	10.0716	7.3742e-24	2.04172e-22	up
SCN4A	chr17	63938554	63972918	protein_coding	sodium voltage-gated channel alpha subunit 4	-	34365	117.092	1.83202	0.181996	10.0663	7.78472e-24	2.15228e-22	up
NPY1R	chr4	163323962	163344689	protein_coding	neuropeptide Y receptor Y1	-	20728	69.4697	2.6099	0.25959	10.0539	8.82937e-24	2.43061e-22	up
SYT13	chr11	45240302	45286341	protein_coding	synaptotagmin 13	-	46040	66.8788	2.70166	0.268756	10.0525	8.9611e-24	2.46334e-22	up
LOXL1	chr15	73926462	73952136	protein_coding	lysyl oxidase like 1	+	25675	107.727	1.93288	0.192318	10.0504	9.14583e-24	2.51053e-22	up
GPR153	chr1	6247353	6261098	protein_coding	G protein-coupled receptor 153	-	13746	250.625	1.17762	0.117813	9.99572	1.59123e-23	4.31249e-22	up
NOS2	chr17	27756766	27800529	protein_coding	nitric oxide synthase 2	-	43764	234.947	1.20945	0.121202	9.97882	1.88702e-23	5.07831e-22	up
RTN2	chr19	45485294	45497047	protein_coding	reticulon 2	-	11754	298.115	1.10002	0.110265	9.97608	1.93989e-23	5.21327e-22	up
HOXA11-AS	chr7	27185408	27189293	lncRNA	HOXA11 antisense RNA	+	3886	329.61	-1.11049	0.111318	-9.97582	1.94487e-23	5.21936e-22	down
IGSF9	chr1	159927041	159945613	protein_coding	immunoglobulin superfamily member 9	-	18573	132.293	1.76702	0.177435	9.95871	2.31038e-23	6.16582e-22	up
HCN4	chr15	73319859	73368958	protein_coding	hyperpolarization activated cyclic nucleotide gated potassium channel 4	-	49100	60.8609	2.82868	0.284245	9.95156	2.48254e-23	6.61609e-22	up
ZNF467	chr7	149764182	149776530	protein_coding	zinc finger protein 467	-	12349	136.219	1.66483	0.167397	9.94538	2.64152e-23	7.01061e-22	up
CA12	chr15	63321378	63381846	protein_coding	carbonic anhydrase 12	-	60469	337.335	1.0592	0.10658	9.93809	2.84229e-23	7.49173e-22	up
HHIP	chr4	144646156	144745271	protein_coding	hedgehog interacting protein	+	99116	168.857	1.44304	0.145278	9.9329	2.99408e-23	7.88099e-22	up
BSPRY	chr9	113349541	113371222	protein_coding	B-box and SPRY domain containing	+	21682	92.8228	2.02258	0.203742	9.9272	3.17035e-23	8.33355e-22	up
SCN3A	chr2	165087526	165204050	protein_coding	sodium voltage-gated channel alpha subunit 3	-	116525	50.2837	4.29018	0.433068	9.90648	3.90163e-23	1.01861e-21	up
DCHS2	chr4	154231742	154491799	protein_coding	dachsous cadherin-related 2	-	260058	74.3504	2.42073	0.244513	9.90021	4.15413e-23	1.08306e-21	up
BICDL1	chr12	119989236	120094495	protein_coding	BICD family like cargo adaptor 1	+	105260	211.684	1.30048	0.131402	9.8969	4.29364e-23	1.11792e-21	up
CCDC74B	chr2	130139287	130145112	protein_coding	coiled-coil domain containing 74B	-	5826	229.774	1.23112	0.1245	9.88852	4.66858e-23	1.20736e-21	up
GAB2	chr11	78215293	78417820	protein_coding	GRB2 associated binding protein 2	-	202528	237.602	1.20734	0.122269	9.87449	5.37066e-23	1.38706e-21	up
GPR37	chr7	124743885	124765792	protein_coding	G protein-coupled receptor 37	-	21908	208.851	1.33814	0.135603	9.86808	5.72514e-23	1.47663e-21	up
SLC38A3	chr3	50205271	50221486	protein_coding	solute carrier family 38 member 3	+	16216	254.002	1.15356	0.116995	9.85988	6.21219e-23	1.59795e-21	up
ADCY7	chr16	50244699	50318135	protein_coding	adenylate cyclase 7	+	73437	251.94	1.16472	0.118199	9.85394	6.59101e-23	1.69313e-21	up
SHISA7	chr19	55428740	55443300	protein_coding	shisa family member 7	-	14561	50.6028	3.53546	0.359205	9.84245	7.38888e-23	1.89051e-21	up
JAKMIP1	chr4	6026199	6200549	protein_coding	janus kinase and microtubule interacting protein 1	-	174351	62.8265	2.69899	0.274548	9.83068	8.30585e-23	2.11667e-21	up
ERBB3	chr12	56080108	56103505	protein_coding	erb-b2 receptor tyrosine kinase 3	+	23398	157.452	1.46258	0.148795	9.82954	8.4002e-23	2.13788e-21	up
CALHM5	chr6	116511639	116524788	protein_coding	calcium homeostasis modulator family member 5	+	13150	74.4598	2.323	0.236479	9.82331	8.93601e-23	2.26824e-21	up
STAC2	chr17	39210541	39225945	protein_coding	SH3 and cysteine rich domain 2	-	15405	164.339	1.42796	0.145509	9.81359	9.84009e-23	2.48459e-21	up
AGAP11	chr10	86970336	87010226	lncRNA	ArfGAP with GTPase domain, ankyrin repeat and PH domain 11	+	39891	90.0199	2.16353	0.22049	9.81235	9.96169e-23	2.51199e-21	up
RORB	chr9	74497335	74693177	protein_coding	RAR related orphan receptor B	+	195843	180.615	1.43602	0.146355	9.81187	1.00099e-22	2.52083e-21	up
TMCC3	chr12	94567122	94650557	protein_coding	transmembrane and coiled-coil domain family 3	-	83436	248.928	1.16285	0.118716	9.79521	1.18049e-22	2.969e-21	up
ADAMTS20	chr12	43352763	43552203	protein_coding	ADAM metallopeptidase with thrombospondin type 1 motif 20	-	199441	186.277	1.34716	0.137553	9.79377	1.19746e-22	3.00775e-21	up
PTPN5	chr11	18727928	18792721	protein_coding	protein tyrosine phosphatase non-receptor type 5	-	64794	54.8808	3.04289	0.311156	9.7793	1.38163e-22	3.44779e-21	up
HOXA4	chr7	27128525	27130757	protein_coding	homeobox A4	-	2233	270.41	-1.18992	0.121707	-9.77691	1.41462e-22	3.52553e-21	down
SSTR2	chr17	73165010	73176633	protein_coding	somatostatin receptor 2	+	11624	212.214	1.27026	0.13008	9.7652	1.58792e-22	3.9421e-21	up
LOC105376010	chr9	31578606	31606156	lncRNA	uncharacterized LOC105376010	+	27551	89.4884	2.02571	0.20762	9.75682	1.72476e-22	4.26731e-21	up
FBLN2	chr3	13549125	13638404	protein_coding	fibulin 2	+	89280	116.467	1.76128	0.181065	9.72735	2.30513e-22	5.64242e-21	up
OTULINL	chr5	14581792	14616180	protein_coding	OTU deubiquitinase with linear linkage specificity like	+	34389	359.238	1.0042	0.103686	9.68503	3.49092e-22	8.46945e-21	up
CSRNP1	chr3	39141855	39154641	protein_coding	cysteine and serine rich nuclear protein 1	-	12787	279.971	1.1162	0.115706	9.64683	5.06964e-22	1.21766e-20	up
ALS2CL	chr3	46668995	46693679	protein_coding	ALS2 C-terminal like	-	24685	106.638	1.78918	0.185935	9.62262	6.41731e-22	1.53369e-20	up
TLL2	chr10	96364608	96513926	protein_coding	tolloid like 2	-	149319	97.6548	1.91687	0.199202	9.62272	6.41159e-22	1.53369e-20	up
DLX4	chr17	49968572	49974959	protein_coding	distal-less homeobox 4	+	6388	258.767	1.09693	0.114044	9.61849	6.68032e-22	1.59456e-20	up
CYP2S1	chr19	41193219	41207539	protein_coding	cytochrome P450 family 2 subfamily S member 1	+	14321	195.321	1.38218	0.143709	9.61793	6.71692e-22	1.60131e-20	up
CHST1	chr11	45647689	45665622	protein_coding	carbohydrate sulfotransferase 1	-	17934	52.3083	3.11454	0.32421	9.60655	7.50173e-22	1.78398e-20	up
GDPD5	chr11	75434640	75525941	protein_coding	glycerophosphodiester phosphodiesterase domain containing 5	-	91302	299.449	1.05548	0.109941	9.60043	7.96145e-22	1.8863e-20	up
RNF182	chr6	13924446	13980310	protein_coding	ring finger protein 182	+	55865	284.81	1.09552	0.11431	9.58379	9.35446e-22	2.2109e-20	up
RGS9	chr17	65137370	65227703	protein_coding	regulator of G protein signaling 9	+	90334	63.0536	2.57084	0.268273	9.58292	9.43375e-22	2.2269e-20	up
TAC1	chr7	97732086	97740472	protein_coding	tachykinin precursor 1	+	8387	49.0482	3.41858	0.356755	9.58244	9.4781e-22	2.23462e-20	up
FMNL1	chr17	45221885	45247318	protein_coding	formin like 1	+	25434	75.4938	2.22837	0.232692	9.57649	1.00397e-21	2.36413e-20	up
CRIP2	chr14	105472945	105480170	protein_coding	cysteine rich protein 2	+	7226	108.312	1.94477	0.203083	9.57622	1.00658e-21	2.36737e-20	up
CLSTN2	chr3	139935185	140577397	protein_coding	calsyntenin 2	+	642213	68.081	2.45872	0.257632	9.54355	1.38023e-21	3.23034e-20	up
PHOSPHO1	chr17	49223366	49230787	protein_coding	phosphoethanolamine/phosphocholine phosphatase 1	-	7422	112.09	1.73745	0.182179	9.53706	1.46945e-21	3.42664e-20	up
BDKRB2	chr14	96204839	96244164	protein_coding	bradykinin receptor B2	+	39326	46.7209	3.70932	0.389547	9.52213	1.6967e-21	3.94699e-20	up
NPY	chr7	24284190	24291862	protein_coding	neuropeptide Y	+	7673	50.6797	3.17181	0.333428	9.51274	1.85698e-21	4.30422e-20	up
COL4A4	chr2	226967360	227164488	protein_coding	collagen type IV alpha 4 chain	-	197129	112.404	1.70535	0.179438	9.50384	2.02286e-21	4.67178e-20	up
FER1L4	chr20	35558737	35607562	transcribed_pseudogene	fer-1 like family member 4 (pseudogene)	-	48826	100.527	1.87971	0.197912	9.49767	2.14648e-21	4.93948e-20	up
TTC9	chr14	70641916	70675366	protein_coding	tetratricopeptide repeat domain 9	+	33451	221.543	1.18731	0.125016	9.49729	2.15423e-21	4.95137e-20	up
SYNE3	chr14	95407266	95516650	protein_coding	spectrin repeat containing nuclear envelope family member 3	-	109385	200.376	1.24764	0.131754	9.46946	2.81281e-21	6.43431e-20	up
CCNJL	chr5	160249083	160339570	protein_coding	cyclin J like	-	90488	149.818	1.52521	0.16145	9.44693	3.4892e-21	7.97206e-20	up
ST6GALNAC5	chr1	76867480	77067546	protein_coding	ST6 N-acetylgalactosaminide alpha-2,6-sialyltransferase 5	+	200067	89.1674	1.96716	0.20895	9.4145	4.75339e-21	1.07708e-19	up
CR2	chr1	207454328	207489892	protein_coding	complement C3d receptor 2	+	35565	143.233	1.58432	0.168336	9.41164	4.88472e-21	1.10164e-19	up
PLPPR3	chr19	812488	823797	protein_coding	phospholipid phosphatase related 3	-	11310	143.202	1.52897	0.163505	9.35118	8.6678e-21	1.92545e-19	up
RAP1GAP	chr1	21596221	21669357	protein_coding	RAP1 GTPase activating protein	-	73137	239.938	1.11953	0.119746	9.34919	8.83203e-21	1.95741e-19	up
SORCS2	chr4	7192538	7742827	protein_coding	sortilin related VPS10 domain containing receptor 2	+	550290	51.2043	3.02804	0.323898	9.34874	8.87021e-21	1.96361e-19	up
ADORA1	chr1	203127726	203167405	protein_coding	adenosine A1 receptor	+	39680	114.094	1.65962	0.177864	9.33084	1.05037e-20	2.31454e-19	up
APH1B	chr15	63277605	63309126	protein_coding	aph-1 homolog B, gamma-secretase subunit	+	31522	175.188	1.32544	0.14228	9.31571	1.21144e-20	2.66336e-19	up
COL24A1	chr1	85729233	86156984	protein_coding	collagen type XXIV alpha 1 chain	-	427752	107.345	1.74874	0.187819	9.31078	1.26902e-20	2.7836e-19	up
IGFBPL1	chr9	38406528	38424454	protein_coding	insulin like growth factor binding protein like 1	-	17927	235.275	1.11224	0.119562	9.3026	1.37054e-20	2.99942e-19	up
SERPING1	chr11	57597685	57614848	protein_coding	serpin family G member 1	+	17164	95.6194	1.87827	0.201927	9.30173	1.38182e-20	3.02066e-19	up
PRUNE2	chr9	76611376	76906114	protein_coding	prune homolog 2 with BCH domain	-	294739	284.029	1.02753	0.110528	9.29658	1.45041e-20	3.16341e-19	up
C1QL1	chr17	44959693	44968303	protein_coding	complement C1q like 1	-	8611	118.607	1.64042	0.176489	9.29473	1.47581e-20	3.21516e-19	up
SYT1	chr12	78863982	79452008	protein_coding	synaptotagmin 1	+	588027	265.907	1.062	0.114293	9.29194	1.51497e-20	3.29673e-19	up
TMEM266	chr15	76059985	76204963	protein_coding	transmembrane protein 266	+	144979	201.89	1.25769	0.135523	9.28028	1.69038e-20	3.67013e-19	up
ABI3BP	chr3	100749156	100993421	protein_coding	ABI family member 3 binding protein	-	244266	75.9498	2.19441	0.236617	9.27408	1.7916e-20	3.88112e-19	up
NRG2	chr5	139846781	140043299	protein_coding	neuregulin 2	-	196519	93.1818	1.86313	0.200998	9.2694	1.87192e-20	4.05056e-19	up
GFRA1	chr10	116056925	116274705	protein_coding	GDNF family receptor alpha 1	-	217781	177.636	1.3318	0.143763	9.26382	1.97249e-20	4.25858e-19	up
ARK2C	chr18	46334018	46463140	protein_coding	arkadia (RNF111) C-terminal like ring finger ubiquitin ligase 2C	+	129123	161.066	1.36452	0.147375	9.25885	2.06637e-20	4.4413e-19	up
DYNC1I1	chr7	95772554	96110322	protein_coding	dynein cytoplasmic 1 intermediate chain 1	+	337769	108.035	1.74668	0.188918	9.24572	2.33656e-20	5.01642e-19	up
SLC16A7	chr12	59596029	59789841	protein_coding	solute carrier family 16 member 7	+	193813	57.5622	2.73584	0.296326	9.23255	2.6426e-20	5.66485e-19	up
ANXA3	chr4	78551770	78610447	protein_coding	annexin A3	+	58678	117.378	1.66509	0.180371	9.2315	2.66876e-20	5.71049e-19	up
KREMEN2	chr16	2964275	2968380	protein_coding	kringle containing transmembrane protein 2	+	4106	100.372	1.75998	0.19132	9.19918	3.60696e-20	7.68379e-19	up
B3GAT1	chr11	134378504	134412242	protein_coding	beta-1,3-glucuronyltransferase 1	-	33739	43.9072	4.44922	0.48369	9.1985	3.6297e-20	7.71753e-19	up
C1QL4	chr12	49332409	49337188	protein_coding	complement C1q like 4	-	4780	109.874	1.66278	0.180859	9.19378	3.79266e-20	8.03483e-19	up
CYP2J2	chr1	59893308	59969212	protein_coding	cytochrome P450 family 2 subfamily J member 2	-	75905	245.993	1.07195	0.116646	9.18974	3.93803e-20	8.32445e-19	up
SNCG	chr10	86955759	86963258	protein_coding	synuclein gamma	+	7500	49.3061	2.9682	0.323195	9.18394	4.15581e-20	8.77516e-19	up
ATP8A2	chr13	25371974	26025851	protein_coding	ATPase phospholipid transporting 8A2	+	653878	66.7312	2.31442	0.25213	9.17948	4.33167e-20	9.12642e-19	up
PDZD7	chr10	101007679	101031129	protein_coding	PDZ domain containing 7	-	23451	84.0242	1.96762	0.214625	9.16769	4.83283e-20	1.01379e-18	up
SYN3	chr22	32507820	33058381	protein_coding	synapsin III	-	550562	97.4861	1.76314	0.192325	9.16751	4.84073e-20	1.01434e-18	up
EPOR	chr19	11377207	11384314	protein_coding	erythropoietin receptor	-	7108	202.461	1.2694	0.138815	9.14455	5.98765e-20	1.24786e-18	up
IRF8	chr16	85899162	85922609	protein_coding	interferon regulatory factor 8	+	23448	208.609	1.21859	0.133274	9.14349	6.04685e-20	1.25883e-18	up
SLITRK6	chr13	85792790	85799419	protein_coding	SLIT and NTRK like family member 6	-	6630	51.2493	5.35385	0.585719	9.14066	6.20749e-20	1.29088e-18	up
LOXL2	chr8	23296897	23404120	protein_coding	lysyl oxidase like 2	-	107224	297.473	1.00214	0.109717	9.13387	6.60928e-20	1.37008e-18	up
GLIS3	chr9	3824127	4490465	protein_coding	GLIS family zinc finger 3	-	666339	122.967	1.5532	0.17046	9.11185	8.09866e-20	1.6697e-18	up
SCIN	chr7	12570720	12660182	protein_coding	scinderin	+	89463	90.6117	1.89313	0.208155	9.09481	9.47532e-20	1.94517e-18	up
SLC46A3	chr13	28700080	28718970	protein_coding	solute carrier family 46 member 3	-	18891	224.718	1.16819	0.128449	9.09459	9.49411e-20	1.94695e-18	up
HLA-DRA	chr6	32439887	32445046	protein_coding	major histocompatibility complex, class II, DR alpha	+	5160	43.2734	4.57107	0.502746	9.09219	9.70602e-20	1.98828e-18	up
DLL1	chr6	170282206	170291078	protein_coding	delta like canonical Notch ligand 1	-	8873	266.739	1.02141	0.112409	9.08655	1.02235e-19	2.09205e-18	up
S1PR5	chr19	10512742	10517965	protein_coding	sphingosine-1-phosphate receptor 5	-	5224	86.7305	1.86421	0.205259	9.08223	1.06372e-19	2.17439e-18	up
PPM1J	chr1	112709998	112715332	protein_coding	protein phosphatase, Mg2+/Mn2+ dependent 1J	-	5335	181.503	1.40396	0.154672	9.07704	1.11567e-19	2.27574e-18	up
KLC3	chr19	45340750	45351519	protein_coding	kinesin light chain 3	+	10770	229.978	1.09401	0.120692	9.0645	1.25177e-19	2.53989e-18	up
FBXO2	chr1	11648387	11654429	protein_coding	F-box protein 2	-	6043	60.7297	2.41211	0.266119	9.06403	1.25713e-19	2.54807e-18	up
TMEM145	chr19	42313309	42325064	protein_coding	transmembrane protein 145	+	11756	236.384	1.13341	0.125105	9.05971	1.30802e-19	2.64286e-18	up
TMEM38A	chr19	16661139	16690023	protein_coding	transmembrane protein 38A	+	28885	189.19	1.22208	0.135041	9.04968	1.43383e-19	2.88492e-18	up
AQP4	chr18	26852038	26865803	protein_coding	aquaporin 4	-	13766	44.6213	3.2691	0.361275	9.04879	1.44563e-19	2.9026e-18	up
C2orf72	chr2	231037523	231049719	protein_coding	chromosome 2 open reading frame 72	+	12197	140.978	1.45149	0.160685	9.03317	1.66763e-19	3.33093e-18	up
S1PR1	chr1	101236899	101242313	protein_coding	sphingosine-1-phosphate receptor 1	+	5415	114.226	1.65095	0.182858	9.02859	1.73895e-19	3.46617e-18	up
CREG2	chr2	101345550	101387503	protein_coding	cellular repressor of E1A stimulated genes 2	-	41954	71.2143	2.32	0.257404	9.01309	2.00339e-19	3.97266e-18	up
PER2	chr2	238244044	238300065	protein_coding	period circadian regulator 2	-	56022	275.94	-1.02801	0.114084	-9.01095	2.04282e-19	4.04667e-18	down
GUCY2D	chr17	8002615	8020342	protein_coding	guanylate cyclase 2D, retinal	+	17728	68.1109	2.19224	0.243372	9.00777	2.10297e-19	4.15298e-18	up
PRKCH	chr14	61187468	61550976	protein_coding	protein kinase C eta	+	363509	315.644	1.04329	0.115835	9.00671	2.12334e-19	4.18892e-18	up
AMIGO2	chr12	47075707	47079959	protein_coding	adhesion molecule with Ig like domain 2	-	4253	88.3088	1.89754	0.210939	8.99567	2.34806e-19	4.61802e-18	up
PRICKLE2	chr3	64092236	64268173	protein_coding	prickle planar cell polarity protein 2	-	175938	90.8283	1.81631	0.201929	8.99483	2.36598e-19	4.64849e-18	up
CYRIA	chr2	16549459	16665834	protein_coding	CYFIP related Rac1 interactor A	-	116376	44.7775	3.21094	0.357514	8.9813	2.67592e-19	5.24136e-18	up
GRIK4	chr11	120511748	120988906	protein_coding	glutamate ionotropic receptor kainate type subunit 4	+	477159	106.859	1.62261	0.18069	8.9801	2.70522e-19	5.29337e-18	up
VWA5B2	chr3	184229585	184242329	protein_coding	von Willebrand factor A domain containing 5B2	+	12745	67.9068	2.21263	0.246456	8.97779	2.76249e-19	5.39993e-18	up
USH1G	chr17	74916083	74923255	protein_coding	USH1 protein network component sans	-	7173	58.6567	2.41576	0.269193	8.97408	2.85736e-19	5.57969e-18	up
ALOX5	chr10	45374216	45446117	protein_coding	arachidonate 5-lipoxygenase	+	71902	54.5882	2.60876	0.290815	8.97052	2.9511e-19	5.75689e-18	up
KIAA0319	chr6	24540141	24646191	protein_coding	KIAA0319	-	106051	95.8967	1.77614	0.198066	8.96744	3.0349e-19	5.91437e-18	up
BCHE	chr3	165772904	165837423	protein_coding	butyrylcholinesterase	-	64520	208.302	1.14713	0.127995	8.96233	3.179e-19	6.17639e-18	up
DNM3	chr1	171841498	172418466	protein_coding	dynamin 3	+	576969	217.616	1.16018	0.129524	8.95726	3.32833e-19	6.45999e-18	up
LINC01694	chr21	45593654	45603056	lncRNA	long intergenic non-protein coding RNA 1694	+	9403	130.84	1.49751	0.167811	8.92381	4.50532e-19	8.66563e-18	up
CD70	chr19	6581648	6591150	protein_coding	CD70 molecule	-	9503	66.8175	2.21033	0.247781	8.92048	4.64255e-19	8.90286e-18	up
ABCC9	chr12	21797389	21941426	protein_coding	ATP binding cassette subfamily C member 9	-	144038	42.3176	3.55479	0.39871	8.91571	4.84695e-19	9.26707e-18	up
NTNG2	chr9	132161689	132244526	protein_coding	netrin G2	+	82838	66.3664	2.33278	0.261787	8.91097	5.05871e-19	9.64316e-18	up
SPOCK1	chr5	136975298	137499326	protein_coding	SPARC (osteonectin), cwcv and kazal like domains proteoglycan 1	-	524029	50.8091	2.8237	0.316875	8.91108	5.05395e-19	9.64316e-18	up
STXBP5L	chr3	120908205	121424761	protein_coding	syntaxin binding protein 5L	+	516557	144.534	1.37719	0.154578	8.90937	5.13229e-19	9.77374e-18	up
MTUS2	chr13	28819963	29505947	protein_coding	microtubule associated scaffold protein 2	+	685985	46.2946	3.02406	0.339752	8.90077	5.54591e-19	1.05301e-17	up
DENND2A	chr7	140518419	140641460	protein_coding	DENN domain containing 2A	-	123042	126.11	1.49642	0.168471	8.88233	6.54729e-19	1.23339e-17	up
C6orf141	chr6	49550668	49561916	protein_coding	chromosome 6 open reading frame 141	+	11249	89.5672	1.78995	0.201529	8.88185	6.57564e-19	1.23752e-17	up
TRPC4	chr13	37632063	37869772	protein_coding	transient receptor potential cation channel subfamily C member 4	-	237710	40.8594	3.58451	0.404151	8.86924	7.36464e-19	1.38465e-17	up
APOE	chr19	44905796	44909393	protein_coding	apolipoprotein E	+	3598	123.556	1.50772	0.170004	8.86874	7.39771e-19	1.38951e-17	up
FHDC1	chr4	152911339	152979671	protein_coding	FH2 domain containing 1	+	68333	156.594	1.33969	0.151438	8.84642	9.03692e-19	1.6826e-17	up
MAFA	chr8	143428064	143430732	protein_coding	MAF bZIP transcription factor A	-	2669	74.8202	2.01399	0.22868	8.807	1.28545e-18	2.37043e-17	up
SLC4A3	chr2	219627630	219641971	protein_coding	solute carrier family 4 member 3	+	14342	152.087	1.31273	0.149353	8.78942	1.5033e-18	2.75893e-17	up
SLC2A12	chr6	133987581	134052624	protein_coding	solute carrier family 2 member 12	-	65044	269.497	1.10224	0.125695	8.76911	1.80079e-18	3.28606e-17	up
ARHGAP23	chr17	38419275	38512385	protein_coding	Rho GTPase activating protein 23	+	93111	82.4085	2.00545	0.229587	8.73504	2.43566e-18	4.4069e-17	up
OLFML2B	chr1	161983192	162023869	protein_coding	olfactomedin like 2B	-	40678	80.7263	1.89487	0.217285	8.72065	2.76617e-18	4.99079e-17	up
PLXNB1	chr3	48403854	48430310	protein_coding	plexin B1	-	26457	269.726	1.0287	0.118047	8.71433	2.92487e-18	5.25958e-17	up
DKK1	chr10	52314281	52317657	protein_coding	dickkopf WNT signaling pathway inhibitor 1	+	3377	70.775	2.0677	0.237484	8.70672	3.12795e-18	5.6119e-17	up
TRIM6	chr11	5596111	5612952	protein_coding	tripartite motif containing 6	+	16842	173.877	1.26073	0.144937	8.6985	3.36306e-18	6.0281e-17	up
JADE2	chr5	134523952	134583227	protein_coding	jade family PHD finger 2	+	59276	210.525	1.11838	0.128762	8.68562	3.76682e-18	6.71423e-17	up
ASTN1	chr1	176857321	177164712	protein_coding	astrotactin 1	-	307392	43.0514	3.14684	0.362342	8.68472	3.79681e-18	6.76142e-17	up
CLIC5	chr6	45880827	46129819	protein_coding	chloride intracellular channel 5	-	248993	76.0341	1.95926	0.22578	8.67775	4.03692e-18	7.16907e-17	up
CRB1	chr1	197201504	197478455	protein_coding	crumbs cell polarity complex component 1	+	276952	45.6803	2.84313	0.3282	8.66278	4.60387e-18	8.10103e-17	up
STRA6	chr15	74179466	74212259	protein_coding	signaling receptor and transporter of retinol STRA6	-	32794	39.0802	3.69927	0.427052	8.66235	4.6212e-18	8.1241e-17	up
CDH10	chr5	24487100	24644978	protein_coding	cadherin 10	-	157879	56.9552	2.36426	0.273191	8.65427	4.9609e-18	8.70536e-17	up
LRRC75A	chr17	16441577	16492193	protein_coding	leucine rich repeat containing 75A	-	50617	98.8145	1.71755	0.198514	8.65203	5.05923e-18	8.86981e-17	up
BCAS4	chr20	50794894	50882676	protein_coding	breast carcinoma amplified sequence 4	+	87783	238.775	1.05017	0.121424	8.64877	5.20584e-18	9.11022e-17	up
TMEM229B	chr14	67470269	67533850	protein_coding	transmembrane protein 229B	-	63582	48.9283	2.67235	0.309371	8.63801	5.72005e-18	9.9919e-17	up
CFD	chr19	859664	863641	protein_coding	complement factor D	+	3978	213.695	1.20124	0.139138	8.63344	5.95363e-18	1.03905e-16	up
LOC105375103	chr6	57789603	57800285	lncRNA	uncharacterized LOC105375103	-	10683	130.677	1.40557	0.163294	8.60764	7.45817e-18	1.29457e-16	up
FAM43B	chr1	20552573	20555020	protein_coding	family with sequence similarity 43 member B	+	2448	51.6517	2.59574	0.301622	8.60595	7.569e-18	1.31262e-16	up
HES2	chr1	6415232	6419919	protein_coding	hes family bHLH transcription factor 2	-	4688	38.2012	4.24065	0.493558	8.592	8.54691e-18	1.47821e-16	up
ELMO1	chr7	36852906	37449326	protein_coding	engulfment and cell motility 1	-	596421	145.783	1.35053	0.157553	8.5719	1.0179e-17	1.74477e-16	up
THSD1	chr13	52377167	52406172	protein_coding	thrombospondin type 1 domain containing 1	-	29006	163.813	1.24684	0.145486	8.57016	1.03341e-17	1.76979e-16	up
GEM	chr8	94249253	94262319	protein_coding	GTP binding protein overexpressed in skeletal muscle	-	13067	77.1497	1.90725	0.222764	8.56176	1.11159e-17	1.89523e-16	up
ADGRG6	chr6	142302007	142446261	protein_coding	adhesion G protein-coupled receptor G6	+	144255	229.355	1.05262	0.123046	8.55467	1.18205e-17	2.00822e-16	up
CGNL1	chr15	57376505	57550717	protein_coding	cingulin like 1	+	174213	244.172	1.04162	0.121917	8.54367	1.30024e-17	2.19737e-16	up
RUBCNL	chr13	46334681	46390042	protein_coding	rubicon like autophagy enhancer	-	55362	143.275	1.33393	0.156177	8.54118	1.32862e-17	2.24139e-16	up
ADAMTS10	chr19	8580240	8610715	protein_coding	ADAM metallopeptidase with thrombospondin type 1 motif 10	-	30476	112.637	1.51769	0.178159	8.51874	1.61305e-17	2.70224e-16	up
CCDC177	chr14	69569799	69574871	protein_coding	coiled-coil domain containing 177	-	5073	40.5082	3.11463	0.366165	8.5061	1.79881e-17	3.00296e-16	up
SAMD14	chr17	50110040	50130160	protein_coding	sterile alpha motif domain containing 14	-	20121	93.0331	1.69134	0.198887	8.50402	1.83132e-17	3.05194e-16	up
NMRK2	chr19	3933069	3942416	protein_coding	nicotinamide riboside kinase 2	+	9348	37.0951	4.33935	0.510374	8.50229	1.85894e-17	3.0926e-16	up
JAM2	chr21	25639258	25717562	protein_coding	junctional adhesion molecule 2	+	78305	75.2203	1.94003	0.228808	8.47885	2.27429e-17	3.76728e-16	up
AK5	chr1	77282019	77559966	protein_coding	adenylate kinase 5	+	277948	76.2047	1.96363	0.23197	8.46503	2.56077e-17	4.22362e-16	up
NT5C1A	chr1	39651229	39672107	protein_coding	5'-nucleotidase, cytosolic IA	-	20879	210.719	1.17083	0.138724	8.43994	3.17499e-17	5.19654e-16	up
MRAP2	chr6	84033178	84146282	protein_coding	melanocortin 2 receptor accessory protein 2	+	113105	100.633	1.57157	0.186596	8.42234	3.69025e-17	6.00407e-16	up
PRRT3	chr3	9945542	9952408	protein_coding	proline rich transmembrane protein 3	-	6867	126.441	1.41887	0.168597	8.41577	3.90307e-17	6.34496e-16	up
NTS	chr12	85874295	85882992	protein_coding	neurotensin	+	8698	44.8645	2.81447	0.334723	8.40836	4.158e-17	6.73659e-16	up
PDZD2	chr5	31639131	32110932	protein_coding	PDZ domain containing 2	+	471802	152.851	1.29664	0.154342	8.40106	4.42483e-17	7.15683e-16	up
PRRT2	chr16	29812193	29815881	protein_coding	proline rich transmembrane protein 2	+	3689	120.459	1.40559	0.167391	8.39703	4.57899e-17	7.39993e-16	up
CHRNA4	chr20	63343223	63361349	protein_coding	cholinergic receptor nicotinic alpha 4 subunit	-	18127	59.7246	2.26078	0.269344	8.39366	4.7123e-17	7.6026e-16	up
CDKL2	chr4	75576496	75630528	protein_coding	cyclin dependent kinase like 2	-	54033	110.09	1.50706	0.179712	8.38595	5.0316e-17	8.10413e-16	up
FAM167A	chr8	11421476	11475908	protein_coding	family with sequence similarity 167 member A	-	54433	92.2321	1.68853	0.201476	8.38082	5.25608e-17	8.43035e-16	up
ATP8B3	chr19	1782075	1812276	protein_coding	ATPase phospholipid transporting 8B3	-	30202	47.8629	2.54891	0.30416	8.38015	5.28583e-17	8.47099e-16	up
ATP6V1C2	chr2	10720943	10785110	protein_coding	ATPase H+ transporting V1 subunit C2	+	64168	85.3889	1.79937	0.214889	8.37346	5.59486e-17	8.929e-16	up
RCOR2	chr11	63911230	63927762	protein_coding	REST corepressor 2	-	16533	146.758	1.31432	0.156973	8.37288	5.62281e-17	8.96617e-16	up
WIPF3	chr7	29806508	29917061	protein_coding	WAS/WASL interacting protein family member 3	+	110554	149.613	1.27885	0.152762	8.37154	5.68693e-17	9.06089e-16	up
HLA-DMB	chr6	32934636	32941028	protein_coding	major histocompatibility complex, class II, DM beta	-	6393	212.661	1.07374	0.128327	8.36726	5.89748e-17	9.37304e-16	up
SYNGR3	chr16	1989970	1994275	protein_coding	synaptogyrin 3	+	4306	124.93	1.42616	0.170659	8.35678	6.44517e-17	1.01929e-15	up
GABRD	chr1	2019345	2030758	protein_coding	gamma-aminobutyric acid type A receptor subunit delta	+	11414	87.2581	1.67686	0.200884	8.34739	6.97879e-17	1.10096e-15	up
RFX6	chr6	116877242	116932161	protein_coding	regulatory factor X6	+	54920	95.5669	1.62437	0.194677	8.34391	7.18744e-17	1.13295e-15	up
SNED1	chr2	240997650	241095568	protein_coding	sushi, nidogen and EGF like domains 1	+	97919	111.322	1.45888	0.174982	8.33733	7.59893e-17	1.19683e-15	up
KCNA6	chr12	4809334	4851112	protein_coding	potassium voltage-gated channel subfamily A member 6	+	41779	41.0037	2.94479	0.353568	8.32879	8.16714e-17	1.28422e-15	up
XYLT1	chr16	17101769	17470960	protein_coding	xylosyltransferase 1	-	369192	191.006	1.09972	0.132148	8.32187	8.65849e-17	1.36037e-15	up
NCALD	chr8	101686542	102124907	protein_coding	neurocalcin delta	-	438366	91.6345	1.69147	0.203637	8.30629	9.87404e-17	1.54503e-15	up
LGI2	chr4	24992081	25030946	protein_coding	leucine rich repeat LGI family member 2	-	38866	210.409	1.05161	0.126644	8.30364	1.00971e-16	1.57864e-15	up
LINC01234	chr12	113744577	113773683	lncRNA	long intergenic non-protein coding RNA 1234	-	29107	203.31	1.0735	0.12939	8.29663	1.07111e-16	1.66921e-15	up
SLC19A3	chr2	227683763	227718028	protein_coding	solute carrier family 19 member 3	-	34266	98.0229	1.58942	0.19222	8.26874	1.35377e-16	2.08938e-15	up
GPR155	chr2	174431571	174487029	protein_coding	G protein-coupled receptor 155	-	55459	220.555	1.0207	0.123596	8.25832	1.47737e-16	2.27158e-15	up
HSPB1	chr7	76302673	76304292	protein_coding	heat shock protein family B (small) member 1	+	1620	1610.89	1.01082	0.122607	8.24439	1.66007e-16	2.54372e-15	up
LYPD6	chr2	149329985	149486378	protein_coding	LY6/PLAUR domain containing 6	+	156394	230.878	1.07174	0.130041	8.24154	1.70003e-16	2.60288e-15	up
NLRC5	chr16	56989557	57083520	protein_coding	NLR family CARD domain containing 5	+	93964	57.1865	2.18512	0.265252	8.23788	1.75293e-16	2.68173e-15	up
VSTM2L	chr20	37903127	37945350	protein_coding	V-set and transmembrane domain containing 2 like	+	42224	77.8591	1.82894	0.222028	8.2374	1.75988e-16	2.69022e-15	up
SGSM1	chr22	24806211	24927578	protein_coding	small G protein signaling modulator 1	+	121368	173.741	1.15077	0.1398	8.23158	1.84754e-16	2.8175e-15	up
EPB41L4A	chr5	112141829	112419935	protein_coding	erythrocyte membrane protein band 4.1 like 4A	-	278107	152.977	1.3313	0.161734	8.2314	1.85033e-16	2.81951e-15	up
TXLNB	chr6	139159162	139323950	protein_coding	taxilin beta	-	164789	47.7399	2.46177	0.299271	8.2259	1.93726e-16	2.94964e-15	up
METRNL	chr17	83079609	83095122	protein_coding	meteorin like, glial cell differentiation regulator	+	15514	229.312	1.02816	0.12501	8.22466	1.95747e-16	2.97804e-15	up
PACSIN1	chr6	34466076	34535223	protein_coding	protein kinase C and casein kinase substrate in neurons 1	+	69148	87.6193	1.63768	0.199345	8.21528	2.1167e-16	3.21267e-15	up
DTX1	chr12	113056730	113098025	protein_coding	deltex E3 ubiquitin ligase 1	+	41296	34.5812	4.08797	0.497874	8.21086	2.19617e-16	3.32803e-15	up
DDIT4L	chr4	100185870	100190468	protein_coding	DNA damage inducible transcript 4 like	-	4599	140.765	1.29761	0.158347	8.19473	2.5116e-16	3.78216e-15	up
RBFOX3	chr17	79089345	79665571	protein_coding	RNA binding fox-1 homolog 3	-	576227	59.5011	2.08453	0.254724	8.1835	2.75712e-16	4.13438e-15	up
FGD5	chr3	14810688	14934571	protein_coding	FYVE, RhoGEF and PH domain containing 5	+	123884	58.8557	2.11951	0.259135	8.17916	2.85824e-16	4.28068e-15	up
CACNA1I	chr22	39570753	39689735	protein_coding	calcium voltage-gated channel subunit alpha1 I	+	118983	35.0075	3.52577	0.431718	8.16684	3.16574e-16	4.73015e-15	up
TRIM46	chr1	155173849	155184971	protein_coding	tripartite motif containing 46	+	11123	88.3808	1.63981	0.201027	8.15718	3.42945e-16	5.12019e-15	up
BAALC	chr8	103140725	103230305	protein_coding	BAALC binder of MAP3K1 and KLF4	+	89581	38.6081	2.97152	0.364497	8.15238	3.56838e-16	5.29879e-15	up
TSPAN11	chr12	30926748	31016502	protein_coding	tetraspanin 11	+	89755	74.3508	1.83833	0.225564	8.14995	3.64074e-16	5.40207e-15	up
DLX3	chr17	49990005	49995224	protein_coding	distal-less homeobox 3	-	5220	50.2011	2.35476	0.289025	8.14725	3.72308e-16	5.51573e-15	up
HES7	chr17	8120592	8126634	protein_coding	hes family bHLH transcription factor 7	-	6043	35.284	3.54072	0.435167	8.13647	4.06959e-16	6.00593e-15	up
THBS2	chr6	169215785	169253846	protein_coding	thrombospondin 2	-	38062	34.1196	4.21303	0.517792	8.13654	4.06746e-16	6.00593e-15	up
MLXIPL	chr7	73593202	73647907	protein_coding	MLX interacting protein like	-	54706	216.499	1.09184	0.134199	8.13593	4.08798e-16	6.02844e-15	up
ISM2	chr14	77474394	77498816	protein_coding	isthmin 2	-	24423	61.8989	2.04909	0.251974	8.13216	4.21709e-16	6.2093e-15	up
PHLDA2	chr11	2928273	2929420	protein_coding	pleckstrin homology like domain family A member 2	-	1148	85.0025	1.64386	0.202535	8.1164	4.80209e-16	7.04906e-15	up
HIVEP3	chr1	41506365	42035934	protein_coding	HIVEP zinc finger 3	-	529570	222.859	1.03679	0.127745	8.11607	4.81512e-16	7.06278e-15	up
CCDC184	chr12	48183644	48185926	protein_coding	coiled-coil domain containing 184	+	2283	85.1211	1.67856	0.207017	8.1083	5.13335e-16	7.50665e-15	up
FRMPD1	chr9	37603229	37746904	protein_coding	FERM and PDZ domain containing 1	+	143676	95.8111	1.58595	0.195649	8.10611	5.22677e-16	7.63745e-15	up
HECW1	chr7	43112647	43566001	protein_coding	HECT, C2 and WW domain containing E3 ubiquitin protein ligase 1	+	453355	48.5976	2.37323	0.293189	8.09454	5.74831e-16	8.39315e-15	up
NAV3	chr12	77571862	78213010	protein_coding	neuron navigator 3	+	641149	35.8669	3.21128	0.397534	8.07799	6.58415e-16	9.57717e-15	up
PLAAT3	chr11	63574462	63616927	protein_coding	phospholipase A and acyltransferase 3	-	42466	178.793	1.11686	0.138327	8.07402	6.80216e-16	9.86441e-15	up
SYNPO2	chr4	118850681	119061247	protein_coding	synaptopodin 2	+	210567	38.1393	3.01688	0.37388	8.06912	7.08089e-16	1.02609e-14	up
ADCY5	chr3	123282296	123449090	protein_coding	adenylate cyclase 5	-	166795	86.9774	1.63927	0.203327	8.06224	7.49067e-16	1.08427e-14	up
ADAMTS8	chr11	130404923	130428609	protein_coding	ADAM metallopeptidase with thrombospondin type 1 motif 8	-	23687	38.1518	2.95115	0.366309	8.05644	7.85478e-16	1.13141e-14	up
ASPHD1	chr16	29900363	29919864	protein_coding	aspartate beta-hydroxylase domain containing 1	+	19502	70.6987	1.892	0.235048	8.04943	8.31796e-16	1.19454e-14	up
GCNT2	chr6	10521351	10629368	protein_coding	glucosaminyl (N-acetyl) transferase 2 (I blood group)	+	108018	147.759	1.25231	0.155696	8.04331	8.74413e-16	1.25387e-14	up
SPOCK3	chr4	166733384	167234945	protein_coding	SPARC (osteonectin), cwcv and kazal like domains proteoglycan 3	-	501562	149.44	1.30865	0.162805	8.03817	9.11864e-16	1.30465e-14	up
RAB3C	chr5	58582152	58859394	protein_coding	RAB3C, member RAS oncogene family	+	277243	61.669	2.01504	0.250704	8.03752	9.16765e-16	1.31069e-14	up
PRKCG	chr19	53881094	53907652	protein_coding	protein kinase C gamma	+	26559	74.6398	1.82654	0.227304	8.03569	9.30569e-16	1.32943e-14	up
PPFIA2	chr12	81257975	81759350	protein_coding	PTPRF interacting protein alpha 2	-	501376	93.2063	1.5898	0.197866	8.03474	9.37764e-16	1.33772e-14	up
STYK1	chr12	10618923	10674052	protein_coding	serine/threonine/tyrosine kinase 1	-	55130	62.9739	1.97715	0.246096	8.03405	9.43047e-16	1.34426e-14	up
GPR162	chr12	6821821	6827421	protein_coding	G protein-coupled receptor 162	+	5601	104.798	1.5474	0.192689	8.03055	9.7038e-16	1.38117e-14	up
ADAMTSL1	chr9	17906633	18910950	protein_coding	ADAMTS like 1	+	1004318	33.3744	3.77719	0.471069	8.01834	1.07187e-15	1.52e-14	up
SLCO5A1	chr8	69667046	69834978	protein_coding	solute carrier organic anion transporter family member 5A1	-	167933	174.052	1.13311	0.141763	7.99298	1.31711e-15	1.85545e-14	up
PLEKHG1	chr6	150599885	150843665	protein_coding	pleckstrin homology and RhoGEF domain containing G1	+	243781	177.18	1.10427	0.138326	7.98309	1.42711e-15	2.00894e-14	up
KIF12	chr9	114091638	114099292	protein_coding	kinesin family member 12	-	7655	52.337	2.21896	0.278192	7.97635	1.50719e-15	2.11701e-14	up
DCDC2	chr6	24171755	24383292	protein_coding	doublecortin domain containing 2	-	211538	103.557	1.47212	0.184664	7.9719	1.5625e-15	2.1915e-14	up
CDA	chr1	20589097	20618903	protein_coding	cytidine deaminase	+	29807	48.9476	2.31059	0.289933	7.96938	1.59478e-15	2.23188e-14	up
RGS17	chr6	153004459	153131282	protein_coding	regulator of G protein signaling 17	-	126824	141.751	1.27826	0.160428	7.9678	1.61518e-15	2.25879e-14	up
TMEM74B	chr20	1180570	1189409	protein_coding	transmembrane protein 74B	-	8840	195.676	1.18251	0.14861	7.95715	1.76047e-15	2.45839e-14	up
ACSL6	chr5	131949973	132012213	protein_coding	acyl-CoA synthetase long chain family member 6	-	62241	185.073	1.11353	0.140264	7.93884	2.04075e-15	2.82514e-14	up
SAMD9	chr7	93099518	93117979	protein_coding	sterile alpha motif domain containing 9	-	18462	63.4633	1.94311	0.244879	7.93495	2.10586e-15	2.90899e-14	up
KCNN3	chr1	154697455	154870281	protein_coding	potassium calcium-activated channel subfamily N member 3	-	172827	61.0385	1.9708	0.248373	7.93486	2.10739e-15	2.90902e-14	up
PPFIBP2	chr11	7513999	7667304	protein_coding	PPFIA binding protein 2	+	153306	174.59	1.1271	0.142475	7.91088	2.55576e-15	3.50778e-14	up
PTX3	chr3	157436850	157443633	protein_coding	pentraxin 3	+	6784	51.886	2.20282	0.279253	7.88827	3.0641e-15	4.19051e-14	up
GJA3	chr13	20138255	20161565	protein_coding	gap junction protein alpha 3	-	23311	146.319	1.201	0.152255	7.88807	3.06898e-15	4.1942e-14	up
OSTN	chr3	191199241	191265615	protein_coding	osteocrin	+	66375	64.2807	1.96427	0.249238	7.88112	3.2446e-15	4.42477e-14	up
TCAF2	chr7	143620974	143730410	protein_coding	TRPM8 channel associated factor 2	+	109437	49.9209	2.2732	0.288583	7.87711	3.35042e-15	4.55937e-14	up
CYP1A1	chr15	74719542	74725528	protein_coding	cytochrome P450 family 1 subfamily A member 1	-	5987	71.1556	1.8374	0.23332	7.87501	3.40714e-15	4.63328e-14	up
SULT2A1	chr19	47870467	47886315	protein_coding	sulfotransferase family 2A member 1	-	15849	40.1559	2.68145	0.341075	7.86177	3.78728e-15	5.12483e-14	up
NACAD	chr7	45080437	45088969	protein_coding	NAC alpha domain containing	-	8533	90.6174	1.56571	0.199356	7.85383	4.03517e-15	5.45643e-14	up
SYT14	chr1	209938217	210171389	protein_coding	synaptotagmin 14	+	233173	87.8676	1.58096	0.201451	7.84786	4.23195e-15	5.70245e-14	up
PCBP3	chr21	45643725	45942450	protein_coding	poly(rC) binding protein 3	+	298726	143.944	1.18267	0.150721	7.8468	4.26777e-15	5.74266e-14	up
MTMR7	chr8	17296794	17413351	protein_coding	myotubularin related protein 7	-	116558	103.553	1.46088	0.18623	7.84448	4.34758e-15	5.84187e-14	up
NOTUM	chr17	81952507	81961187	protein_coding	notum, palmitoleoyl-protein carboxylesterase	-	8681	34.7502	3.0829	0.395237	7.80014	6.18391e-15	8.2345e-14	up
SPINK2	chr4	56809860	56821869	protein_coding	serine peptidase inhibitor Kazal type 2	-	12010	59.0467	2.04272	0.261982	7.79717	6.33113e-15	8.4247e-14	up
IFI44L	chr1	78620448	78646145	protein_coding	interferon induced protein 44 like	+	25698	44.4491	2.74475	0.352885	7.77804	7.36573e-15	9.75413e-14	up
WNT11	chr11	76186325	76210761	protein_coding	Wnt family member 11	-	24437	149.155	1.16057	0.149523	7.76181	8.37273e-15	1.10344e-13	up
HS3ST5	chr6	114055596	114343023	protein_coding	heparan sulfate-glucosamine 3-sulfotransferase 5	-	287428	38.1906	2.76744	0.356712	7.7582	8.61446e-15	1.13297e-13	up
PALMD	chr1	99646113	99694535	protein_coding	palmdelphin	+	48423	42.9275	2.54356	0.328355	7.74636	9.45611e-15	1.24111e-13	up
EPHB3	chr3	184561785	184582408	protein_coding	EPH receptor B3	+	20624	110.466	1.37419	0.177552	7.73964	9.96966e-15	1.30762e-13	up
RASSF4	chr10	44959802	44995891	protein_coding	Ras association domain family member 4	+	36090	141.516	1.18874	0.153892	7.72448	1.12315e-14	1.46513e-13	up
SEMA3E	chr7	83363238	83649139	protein_coding	semaphorin 3E	-	285902	125.074	1.29821	0.168215	7.71757	1.18571e-14	1.54255e-13	up
IRX6	chr16	55324203	55330756	protein_coding	iroquois homeobox 6	+	6554	84.589	1.57131	0.203783	7.71074	1.2509e-14	1.62187e-13	up
SLCO2A1	chr3	133932701	134029925	protein_coding	solute carrier organic anion transporter family member 2A1	-	97225	51.4823	2.25804	0.29313	7.70319	1.3271e-14	1.71257e-13	up
IFIT1	chr10	89392623	89406487	protein_coding	interferon induced protein with tetratricopeptide repeats 1	+	13865	131.649	1.25985	0.163628	7.69944	1.36663e-14	1.7624e-13	up
GLI1	chr12	57459785	57472268	protein_coding	GLI family zinc finger 1	+	12484	108.377	1.39274	0.181133	7.68907	1.48203e-14	1.90738e-13	up
MYB	chr6	135181308	135219172	protein_coding	MYB proto-oncogene, transcription factor	+	37865	151.056	1.13149	0.147543	7.66889	1.73495e-14	2.22247e-13	up
CDH22	chr20	46173739	46308498	protein_coding	cadherin 22	-	134760	30.1426	4.3618	0.569319	7.66144	1.83854e-14	2.3536e-13	up
PTPRO	chr12	15322508	15598331	protein_coding	protein tyrosine phosphatase receptor type O	+	275824	45.4207	2.2958	0.300193	7.64772	2.04571e-14	2.60665e-13	up
PLEKHG4B	chr5	92168	189966	protein_coding	pleckstrin homology and RhoGEF domain containing G4B	+	97799	42.1627	2.41972	0.317313	7.62567	2.42777e-14	3.0731e-13	up
SERTM1	chr13	36674020	36697839	protein_coding	serine rich and transmembrane domain containing 1	+	23820	103.962	1.39384	0.183318	7.60343	2.88373e-14	3.63827e-13	up
NXPH3	chr17	49575871	49583827	protein_coding	neurexophilin 3	+	7957	55.4425	2.0739	0.272947	7.59818	3.0033e-14	3.78416e-13	up
TRIM7	chr5	181193924	181205196	protein_coding	tripartite motif containing 7	-	11273	71.363	1.70327	0.224325	7.59286	3.12931e-14	3.93262e-13	up
SPEN-AS1	chr1	15834215	15848147	lncRNA	SPEN antisense RNA 1	-	13933	148.06	-1.15348	0.152061	-7.58562	3.30908e-14	4.15039e-13	down
LOC124901179	chr5	30197989	30205022	lncRNA	uncharacterized LOC124901179	+	7034	41.3543	2.47816	0.326708	7.58526	3.3181e-14	4.15898e-13	up
SOSTDC1	chr7	16461481	16465738	protein_coding	sclerostin domain containing 1	-	4258	76.0836	1.69059	0.223049	7.57948	3.46937e-14	4.34293e-13	up
TRPA1	chr8	72021250	72090010	protein_coding	transient receptor potential cation channel subfamily A member 1	-	68761	93.543	1.52761	0.202024	7.56149	3.98487e-14	4.9688e-13	up
LINC00173	chr12	116533422	116536513	lncRNA	long intergenic non-protein coding RNA 173	+	3092	55.5121	1.98794	0.263128	7.55502	4.18786e-14	5.20503e-13	up
LHX1-DT	chr17	36861674	36936661	lncRNA	LHX1 divergent transcript	-	74988	87.824	1.56587	0.207287	7.5541	4.21765e-14	5.23528e-13	up
TRIM5	chr11	5588635	5685074	protein_coding	tripartite motif containing 5	-	96440	178.392	1.07335	0.142114	7.55276	4.26139e-14	5.27935e-13	up
HMGCLL1	chr6	55434373	55678919	protein_coding	3-hydroxymethyl-3-methylglutaryl-CoA lyase like 1	-	244547	56.0215	2.00382	0.26578	7.53938	4.72222e-14	5.82397e-13	up
ENTPD3	chr3	40387184	40428744	protein_coding	ectonucleoside triphosphate diphosphohydrolase 3	+	41561	45.4312	2.2568	0.299669	7.53096	5.03682e-14	6.1921e-13	up
VSTM4	chr10	49014236	49115522	protein_coding	V-set and transmembrane domain containing 4	-	101287	193.693	1.02722	0.136458	7.52773	5.16287e-14	6.3349e-13	up
STAC	chr3	36380504	36548007	protein_coding	SH3 and cysteine rich domain	+	167504	71.5562	1.68827	0.224442	7.52208	5.39106e-14	6.60225e-13	up
GRAMD1C	chr3	113828192	113947174	protein_coding	GRAM domain containing 1C	+	118983	111.064	1.31817	0.175959	7.49135	6.81676e-14	8.28489e-13	up
SLC25A48	chr5	135579172	135888637	protein_coding	solute carrier family 25 member 48	+	309466	139.931	1.14913	0.153438	7.4892	6.92933e-14	8.41637e-13	up
SLC24A4	chr14	92322581	92501481	protein_coding	solute carrier family 24 member 4	+	178901	92.0689	1.42533	0.190607	7.47786	7.55444e-14	9.14097e-13	up
RETREG1	chr5	16473053	16616997	protein_coding	reticulophagy regulator 1	-	143945	135.93	1.18369	0.158389	7.47336	7.81756e-14	9.44151e-13	up
RYR2	chr1	237042184	237833988	protein_coding	ryanodine receptor 2	+	791805	154.481	1.14785	0.153604	7.47278	7.85161e-14	9.47668e-13	up
GSDME	chr7	24698355	24795539	protein_coding	gasdermin E	-	97185	147.021	1.17022	0.156615	7.47194	7.90208e-14	9.53161e-13	up
SLC27A6	chr5	128965488	129033635	protein_coding	solute carrier family 27 member 6	+	68148	106.159	1.31804	0.176462	7.46925	8.06508e-14	9.71603e-13	up
KCNMA1	chr10	76869602	77637808	protein_coding	potassium calcium-activated channel subfamily M alpha 1	-	768207	30.2619	3.3993	0.455558	7.46183	8.53257e-14	1.02343e-12	up
OLFM1	chr9	135075505	135121184	protein_coding	olfactomedin 1	+	45680	43.4776	2.30028	0.308467	7.45714	8.8421e-14	1.05725e-12	up
SHC2	chr19	416589	461033	protein_coding	SHC adaptor protein 2	-	44445	165.793	1.12166	0.15065	7.44544	9.66247e-14	1.15248e-12	up
SYT3	chr19	50621977	50639881	protein_coding	synaptotagmin 3	-	17905	148.18	1.1067	0.148809	7.43708	1.02937e-13	1.22321e-12	up
CPM	chr12	68842197	68963469	protein_coding	carboxypeptidase M	-	121273	141.411	1.17851	0.158518	7.43455	1.04923e-13	1.24604e-12	up
FA2H	chr16	74712969	74774820	protein_coding	fatty acid 2-hydroxylase	-	61852	68.7741	1.77519	0.238833	7.43275	1.0636e-13	1.26232e-12	up
SSPOP	chr7	149776042	149833965	transcribed_pseudogene	SCO-spondin, pseudogene	+	57924	80.8953	1.56472	0.211147	7.4106	1.25725e-13	1.48483e-12	up
PLD1	chr3	171600404	171810483	protein_coding	phospholipase D1	-	210080	138.958	1.15884	0.156579	7.40099	1.35173e-13	1.59249e-12	up
GPRC5C	chr17	74432088	74451658	protein_coding	G protein-coupled receptor class C group 5 member C	+	19571	158.222	1.09501	0.148132	7.39212	1.44508e-13	1.69726e-12	up
PRR5L	chr11	36296288	36465204	protein_coding	proline rich 5 like	+	168917	80.0398	1.60985	0.217789	7.39179	1.44866e-13	1.69939e-12	up
LGI3	chr8	22146830	22156806	protein_coding	leucine rich repeat LGI family member 3	-	9977	32.0797	2.95299	0.399527	7.39121	1.455e-13	1.70578e-12	up
LOC105369151	chr12	22324131	22333990	lncRNA	uncharacterized LOC105369151	-	9860	32.38	3.12955	0.423594	7.38808	1.48964e-13	1.74426e-12	up
HTR3A	chr11	113975108	113990313	protein_coding	5-hydroxytryptamine receptor 3A	+	15206	29.6288	3.26403	0.441929	7.38588	1.51453e-13	1.77017e-12	up
GPR12	chr13	26755200	26760786	protein_coding	G protein-coupled receptor 12	-	5587	27.4577	4.04143	0.54796	7.3754	1.63848e-13	1.9104e-12	up
FAM131C	chr1	16057769	16073651	protein_coding	family with sequence similarity 131 member C	-	15883	65.6577	1.75444	0.238071	7.36941	1.71384e-13	1.99463e-12	up
LZTS1	chr8	20246165	20303963	protein_coding	leucine zipper tumor suppressor 1	-	57799	108.082	1.30892	0.177659	7.36759	1.73741e-13	2.01922e-12	up
ROR2	chr9	91722601	91950228	protein_coding	receptor tyrosine kinase like orphan receptor 2	-	227628	177.134	1.05107	0.142665	7.36739	1.73997e-13	2.02016e-12	up
CDC42BPG	chr11	64823052	64844653	protein_coding	CDC42 binding protein kinase gamma	-	21602	146.087	1.14106	0.155087	7.35755	1.87318e-13	2.16826e-12	up
POSTN	chr13	37562585	37598768	protein_coding	periostin	-	36184	27.9809	3.76178	0.51167	7.35198	1.95299e-13	2.25656e-12	up
ABCG4	chr11	119149052	119162666	protein_coding	ATP binding cassette subfamily G member 4	+	13615	131.553	1.19433	0.162731	7.33928	2.1474e-13	2.46931e-12	up
PTPRE	chr10	127907103	128085855	protein_coding	protein tyrosine phosphatase receptor type E	+	178753	33.0881	2.78458	0.379606	7.33545	2.20973e-13	2.53947e-12	up
KCNQ1	chr11	2445008	2849105	protein_coding	potassium voltage-gated channel subfamily Q member 1	+	404098	71.1049	1.67601	0.228603	7.33153	2.27535e-13	2.61175e-12	up
RERG	chr12	15107783	15221417	protein_coding	RAS like estrogen regulated growth inhibitor	-	113635	125.091	1.18242	0.161403	7.32588	2.3733e-13	2.72094e-12	up
ACSM3	chr16	20674405	20797581	protein_coding	acyl-CoA synthetase medium chain family member 3	+	123177	93.2573	1.42195	0.194268	7.31954	2.48818e-13	2.84417e-12	up
PTH1R	chr3	46877721	46903799	protein_coding	parathyroid hormone 1 receptor	+	26079	50.3228	2.08372	0.284686	7.31934	2.49188e-13	2.8467e-12	up
TFEB	chr6	41683978	41736223	protein_coding	transcription factor EB	-	52246	155.828	1.08414	0.148463	7.3024	2.82674e-13	3.20826e-12	up
SLC9A9	chr3	143265222	143848468	protein_coding	solute carrier family 9 member A9	-	583247	132.908	1.21405	0.166583	7.28793	3.14765e-13	3.55359e-12	up
PAMR1	chr11	35431827	35530300	protein_coding	peptidase domain containing associated with muscle regeneration 1	-	98474	44.8264	2.23142	0.306511	7.28005	3.33685e-13	3.75615e-12	up
ARHGAP45	chr19	1065959	1086628	protein_coding	Rho GTPase activating protein 45	+	20670	113.223	1.33621	0.184242	7.25244	4.09326e-13	4.57545e-12	up
MAPK4	chr18	50559612	50731826	protein_coding	mitogen-activated protein kinase 4	+	172215	142.968	1.09495	0.151976	7.20472	5.81646e-13	6.4369e-12	up
SEMA3A	chr7	83955777	84492725	protein_coding	semaphorin 3A	-	536949	152.082	1.09332	0.151751	7.20466	5.81883e-13	6.4369e-12	up
CACNG7	chr19	53909278	53943950	protein_coding	calcium voltage-gated channel auxiliary subunit gamma 7	+	34673	29.298	5.02442	0.69845	7.19368	6.30668e-13	6.94458e-12	up
DYSF	chr2	71453561	71686763	protein_coding	dysferlin	+	233203	52.6834	1.893	0.263343	7.18837	6.557e-13	7.19958e-12	up
ZNF804A	chr2	184598529	184939492	protein_coding	zinc finger protein 804A	+	340964	146.104	1.09284	0.152117	7.18422	6.7591e-13	7.40457e-12	up
C3	chr19	6677704	6720650	protein_coding	complement C3	-	42947	45.0055	2.12801	0.296872	7.16811	7.60406e-13	8.29711e-12	up
CADM2	chr3	84958989	86074429	protein_coding	cell adhesion molecule 2	+	1115441	67.5421	1.63936	0.229462	7.14437	9.04112e-13	9.80943e-12	up
CRISPLD2	chr16	84819985	84909508	protein_coding	cysteine rich secretory protein LCCL domain containing 2	+	89524	44.1938	2.16942	0.30383	7.14023	9.31778e-13	1.00868e-11	up
GLIS2	chr16	4314761	4339595	protein_coding	GLIS family zinc finger 2	+	24835	139.392	1.09882	0.154027	7.13393	9.75415e-13	1.05295e-11	up
CCM2L	chr20	32010438	32032180	protein_coding	CCM2 like scaffold protein	+	21743	27.8529	3.26857	0.459141	7.11889	1.08802e-12	1.17122e-11	up
STON1	chr2	48530154	48598513	protein_coding	stonin 1	+	68360	117.539	1.2203	0.171448	7.11762	1.09805e-12	1.18136e-11	up
SLC40A1	chr2	189560590	189580786	protein_coding	solute carrier family 40 member 1	-	20197	93.897	1.35683	0.19121	7.09604	1.2838e-12	1.37427e-11	up
RFPL2	chr22	32190438	32205073	protein_coding	ret finger protein like 2	-	14636	43.5681	2.18303	0.307682	7.09509	1.29265e-12	1.38298e-11	up
FBN3	chr19	8065402	8149592	protein_coding	fibrillin 3	-	84191	47.6389	1.98554	0.280195	7.08626	1.37785e-12	1.46922e-11	up
SIDT1	chr3	113532555	113637111	protein_coding	SID1 transmembrane family member 1	+	104557	48.1127	2.03559	0.287372	7.08345	1.40608e-12	1.49766e-11	up
WIF1	chr12	65050626	65121305	protein_coding	WNT inhibitory factor 1	-	70680	34.5662	2.54318	0.35926	7.07894	1.45266e-12	1.54471e-11	up
SHFL	chr19	10086317	10093243	protein_coding	shiftless antiviral inhibitor of ribosomal frameshifting	+	6927	42.7126	2.19002	0.309397	7.07835	1.45876e-12	1.54948e-11	up
AGTR1	chr3	148697903	148743003	protein_coding	angiotensin II receptor type 1	+	45101	84.2922	1.40941	0.199617	7.06059	1.65797e-12	1.75429e-11	up
OVOS2	chr12	31111652	31201235	transcribed_pseudogene	alpha-2-macroglobulin like 1 pseudogene	-	89584	128.239	1.14976	0.162862	7.05971	1.66855e-12	1.76451e-11	up
PPARGC1A	chr4	23792021	24472905	protein_coding	PPARG coactivator 1 alpha	-	680885	117.433	1.17911	0.167292	7.04821	1.81236e-12	1.90611e-11	up
SLITRK1	chr13	83877205	83882474	protein_coding	SLIT and NTRK like family member 1	-	5270	32.9731	2.64513	0.376278	7.02972	2.06954e-12	2.15886e-11	up
P2RY2	chr11	73218281	73242427	protein_coding	purinergic receptor P2Y2	+	24147	137.918	1.11797	0.159135	7.02532	2.13571e-12	2.22306e-11	up
MYT1	chr20	64164452	64242253	protein_coding	myelin transcription factor 1	+	77802	141.745	1.1002	0.156671	7.02238	2.18125e-12	2.26555e-11	up
WNT2B	chr1	112466541	112530165	protein_coding	Wnt family member 2B	+	63625	81.3051	1.47874	0.210692	7.01848	2.24294e-12	2.32586e-11	up
ACVR1C	chr2	157526767	157628864	protein_coding	activin A receptor type 1C	-	102098	108.202	1.26428	0.180158	7.0176	2.25716e-12	2.33808e-11	up
SQOR	chr15	45631148	45691281	protein_coding	sulfide quinone oxidoreductase	+	60134	46.8605	1.98828	0.283624	7.01029	2.37831e-12	2.45827e-11	up
HSPB8	chr12	119178931	119194746	protein_coding	heat shock protein family B (small) member 8	+	15816	79.3502	1.47862	0.211101	7.00433	2.48176e-12	2.56106e-11	up
CAMK2B	chr7	44217154	44326013	protein_coding	calcium/calmodulin dependent protein kinase II beta	-	108860	119.475	1.22454	0.174986	6.99791	2.59813e-12	2.67397e-11	up
CAMK2N2	chr3	184259213	184261553	protein_coding	calcium/calmodulin dependent protein kinase II inhibitor 2	-	2341	70.3588	1.5616	0.2235	6.98701	2.80802e-12	2.8792e-11	up
CBFA2T3	chr16	88874858	88977207	protein_coding	CBFA2/RUNX1 partner transcriptional co-repressor 3	-	102350	34.7856	2.43901	0.349166	6.98524	2.84378e-12	2.9112e-11	up
SCN3B	chr11	123629188	123654624	protein_coding	sodium voltage-gated channel beta subunit 3	-	25437	67.3	1.61094	0.23062	6.98525	2.84352e-12	2.9112e-11	up
PHACTR3	chr20	59577509	59847711	protein_coding	phosphatase and actin regulator 3	+	270203	107.422	1.26041	0.180475	6.98386	2.87183e-12	2.93835e-11	up
CPEB1	chr15	82543201	82648795	protein_coding	cytoplasmic polyadenylation element binding protein 1	-	105595	138.648	1.06293	0.152255	6.98123	2.92599e-12	2.98899e-11	up
SAMD12	chr8	118131825	118621963	protein_coding	sterile alpha motif domain containing 12	-	490139	146.999	1.03564	0.148652	6.9669	3.23997e-12	3.28527e-11	up
TRNP1	chr1	26993692	27000886	protein_coding	TMF1 regulated nuclear protein 1	+	7195	137.527	1.06173	0.152622	6.95661	3.48558e-12	3.51947e-11	up
LRAT	chr4	154740838	154753120	protein_coding	lecithin retinol acyltransferase	+	12283	59.2714	1.76672	0.254097	6.95292	3.57794e-12	3.60893e-11	up
NPFFR2	chr4	72032000	72148305	protein_coding	neuropeptide FF receptor 2	+	116306	37.5679	2.31389	0.332998	6.94866	3.6878e-12	3.71194e-11	up
METRN	chr16	715118	719655	protein_coding	meteorin, glial cell differentiation regulator	+	4538	192.431	1.10557	0.159109	6.9485	3.69201e-12	3.71423e-11	up
GJA5	chr1	147756199	147773351	protein_coding	gap junction protein alpha 5	-	17153	24.4398	4.24627	0.612656	6.93092	4.18109e-12	4.17783e-11	up
SEMA7A	chr15	74409289	74433958	protein_coding	semaphorin 7A (John Milton Hagen blood group)	-	24670	142.425	1.05413	0.152294	6.92168	4.46327e-12	4.44822e-11	up
ZFYVE28	chr4	2269597	2418645	protein_coding	zinc finger FYVE-type containing 28	-	149049	116.022	1.15363	0.167113	6.9033	5.08087e-12	5.04281e-11	up
OXGR1	chr13	96985713	96994730	protein_coding	oxoglutarate receptor 1	-	9018	53.5643	1.78467	0.258754	6.89717	5.30482e-12	5.25152e-11	up
NFATC2	chr20	51386963	51562839	protein_coding	nuclear factor of activated T cells 2	-	175877	42.6223	2.1042	0.306171	6.87262	6.30346e-12	6.19228e-11	up
FST	chr5	53480629	53487134	protein_coding	follistatin	+	6506	29.7382	2.7523	0.400837	6.86638	6.58511e-12	6.45576e-11	up
FLVCR2	chr14	75578620	75648167	protein_coding	FLVCR heme transporter 2	+	69548	105.471	1.25871	0.183397	6.8633	6.72898e-12	6.58337e-11	up
ADRA1B	chr5	159865086	159989205	protein_coding	adrenoceptor alpha 1B	+	124120	47.3547	1.90977	0.278474	6.85798	6.98407e-12	6.82252e-11	up
GRIK2	chr6	101393708	102070083	protein_coding	glutamate ionotropic receptor kainate type subunit 2	+	676376	33.1231	2.5297	0.368954	6.8564	7.06161e-12	6.89475e-11	up
PAQR9	chr3	142949164	142964008	protein_coding	progestin and adipoQ receptor family member 9	-	14845	88.5902	1.34932	0.196975	6.85021	7.37407e-12	7.18523e-11	up
RAB26	chr16	2148144	2154165	protein_coding	RAB26, member RAS oncogene family	+	6022	59.4424	1.70149	0.248398	6.84984	7.3932e-12	7.20022e-11	up
PHACTR1	chr6	12716767	13287837	protein_coding	phosphatase and actin regulator 1	+	571071	58.9031	1.71053	0.25005	6.84074	7.87858e-12	7.65354e-11	up
IFITM1	chr11	314040	315272	protein_coding	interferon induced transmembrane protein 1	+	1233	83.5407	1.36183	0.199087	6.8404	7.89736e-12	7.66791e-11	up
SLC38A4	chr12	46764761	46832431	protein_coding	solute carrier family 38 member 4	-	67671	23.8311	4.00412	0.586406	6.82824	8.59656e-12	8.30899e-11	up
RFTN1	chr3	16315845	16513699	protein_coding	raftlin, lipid raft linker 1	-	197855	167.6	1.02635	0.150426	6.82299	8.91649e-12	8.59229e-11	up
ARHGEF28	chr5	73626196	73941990	protein_coding	Rho guanine nucleotide exchange factor 28	+	315795	102.249	1.24059	0.181869	6.82134	9.01923e-12	8.68695e-11	up
PLAU	chr10	73909164	73917494	protein_coding	plasminogen activator, urokinase	+	8331	40.1874	2.12117	0.311182	6.81649	9.32894e-12	8.97175e-11	up
CDH12	chr5	21750673	22853344	protein_coding	cadherin 12	-	1102672	116.316	1.18897	0.174516	6.81295	9.56147e-12	9.16785e-11	up
LRRC37A8P	chr17	35904220	35911023	transcribed_pseudogene	leucine rich repeat containing 37 member A8, pseudogene	-	6804	142.347	1.02113	0.150105	6.80276	1.0263e-11	9.80137e-11	up
HMCN2	chr9	130265760	130434123	protein_coding	hemicentin 2	+	168364	23.8053	4.00301	0.588449	6.80265	1.02713e-11	9.80441e-11	up
KCND3	chr1	111770662	111989668	protein_coding	potassium voltage-gated channel subfamily D member 3	-	219007	24.9942	3.32449	0.488777	6.80165	1.03428e-11	9.86775e-11	up
VGLL2	chr6	117265558	117273630	protein_coding	vestigial like family member 2	+	8073	95.6675	1.28907	0.189652	6.79705	1.06786e-11	1.0178e-10	up
MAP6	chr11	75586918	75669038	protein_coding	microtubule associated protein 6	-	82121	36.9311	2.28517	0.336502	6.79095	1.11395e-11	1.05963e-10	up
ZNF365	chr10	62374369	62480285	protein_coding	zinc finger protein 365	+	105917	47.5144	1.91676	0.282442	6.7864	1.14968e-11	1.09146e-10	up
COL8A1	chr3	99638594	99799217	protein_coding	collagen type VIII alpha 1 chain	+	160624	26.9462	3.11039	0.458399	6.78534	1.15811e-11	1.09784e-10	up
ITGB3	chr17	47253827	47313743	protein_coding	integrin subunit beta 3	+	59917	51.1602	1.78124	0.26318	6.76815	1.30441e-11	1.23045e-10	up
COL19A1	chr6	69866556	70212468	protein_coding	collagen type XIX alpha 1 chain	+	345913	65.3794	1.55607	0.230192	6.75986	1.38129e-11	1.29914e-10	up
PCOLCE	chr7	100602363	100608175	protein_coding	procollagen C-endopeptidase enhancer	+	5813	142.177	1.01838	0.150783	6.75391	1.43914e-11	1.35025e-10	up
GDF10	chr10	47300197	47313577	protein_coding	growth differentiation factor 10	+	13381	36.0897	2.29368	0.339909	6.74793	1.4997e-11	1.40227e-10	up
EPPK1	chr8	143857324	143879194	protein_coding	epiplakin 1	-	21871	122.612	1.10344	0.163569	6.74604	1.51939e-11	1.41999e-10	up
GGT1	chr22	24583750	24628996	protein_coding	gamma-glutamyltransferase 1	+	45247	125.9	1.08403	0.160708	6.74531	1.52697e-11	1.42638e-10	up
DKK2	chr4	106921802	107036313	protein_coding	dickkopf WNT signaling pathway inhibitor 2	-	114512	27.7936	2.97077	0.44062	6.74226	1.55944e-11	1.4553e-10	up
COMP	chr19	18782773	18791305	protein_coding	cartilage oligomeric matrix protein	-	8533	46.5869	1.8789	0.278982	6.73485	1.64102e-11	1.52847e-10	up
PDK4	chr7	95583499	95596516	protein_coding	pyruvate dehydrogenase kinase 4	-	13018	79.2614	1.443	0.214317	6.73301	1.66192e-11	1.54643e-10	up
TIAM2	chr6	154995315	155257723	protein_coding	TIAM Rac1 associated GEF 2	+	262409	155.301	1.00199	0.149007	6.72442	1.76292e-11	1.63724e-10	up
LTBP2	chr14	74498183	74612237	protein_coding	latent transforming growth factor beta binding protein 2	-	114055	100.366	1.27436	0.189624	6.72042	1.81205e-11	1.67881e-10	up
RGS7	chr1	240774742	241357230	protein_coding	regulator of G protein signaling 7	-	582489	69.9429	1.49282	0.222624	6.70556	2.0064e-11	1.84995e-10	up
BAIAP3	chr16	1333645	1349439	protein_coding	BAI1 associated protein 3	+	15795	99.3287	1.21766	0.181633	6.70397	2.02826e-11	1.86921e-10	up
PTGFR	chr1	78490974	78540701	protein_coding	prostaglandin F receptor	+	49728	23.0493	3.77315	0.563986	6.69014	2.22953e-11	2.04489e-10	up
TTC21A	chr3	39107680	39138900	protein_coding	tetratricopeptide repeat domain 21A	+	31221	64.6904	1.57653	0.23585	6.68443	2.31818e-11	2.12215e-10	up
KCNB1	chr20	49363877	49483362	protein_coding	potassium voltage-gated channel subfamily B member 1	-	119486	34.1794	2.35372	0.353074	6.66638	2.62189e-11	2.38427e-10	up
IFIH1	chr2	162267074	162318684	protein_coding	interferon induced with helicase C domain 1	-	51611	41.8201	2.03386	0.305294	6.66197	2.7019e-11	2.4547e-10	up
PRDM8	chr4	80185270	80204329	protein_coding	PR/SET domain 8	+	19060	81.7823	1.37927	0.207321	6.65281	2.87553e-11	2.60506e-10	up
INSC	chr11	15111416	15269676	protein_coding	INSC spindle orientation adaptor protein	+	158261	25.5319	3.02441	0.454919	6.64823	2.96634e-11	2.68606e-10	up
WFDC2	chr20	45469753	45481532	protein_coding	WAP four-disulfide core domain 2	+	11780	24.5268	3.17586	0.477751	6.64753	2.98053e-11	2.69637e-10	up
PRPH	chr12	49295147	49298686	protein_coding	peripherin	+	3540	34.64	2.37944	0.358232	6.64219	3.09052e-11	2.78669e-10	up
CHRM3	chr1	239386568	239915450	protein_coding	cholinergic receptor muscarinic 3	+	528883	117.415	1.10825	0.166867	6.64151	3.10482e-11	2.79565e-10	up
SORBS2	chr4	185585523	185956372	protein_coding	sorbin and SH3 domain containing 2	-	370850	123.79	1.13397	0.170785	6.63978	3.14141e-11	2.82727e-10	up
HTR6	chr1	19664875	19680966	protein_coding	5-hydroxytryptamine receptor 6	+	16092	50.7922	1.85536	0.279507	6.63798	3.18014e-11	2.85945e-10	up
NIM1K	chr5	43192225	43280850	protein_coding	NIM1 serine/threonine protein kinase	+	88626	38.0979	2.11163	0.318149	6.63723	3.19639e-11	2.87271e-10	up
VSNL1	chr2	17539972	17657018	protein_coding	visinin like 1	+	117047	34.6514	2.32577	0.350567	6.63431	3.26023e-11	2.92872e-10	up
COL23A1	chr5	178237618	178590393	protein_coding	collagen type XXIII alpha 1 chain	-	352776	32.0586	2.41362	0.364068	6.62958	3.36646e-11	3.0185e-10	up
PRRX1	chr1	170662768	170739421	protein_coding	paired related homeobox 1	+	76654	54.7674	1.67004	0.251984	6.62754	3.41325e-11	3.0576e-10	up
CCDC92B	chr17	2720801	2749652	protein_coding	coiled-coil domain containing 92B	-	28852	35.9384	2.28665	0.346611	6.59717	4.19078e-11	3.72288e-10	up
PTPRB	chr12	70515870	70637429	protein_coding	protein tyrosine phosphatase receptor type B	-	121560	61.343	1.55819	0.236249	6.59551	4.23784e-11	3.76294e-10	up
CABP1	chr12	120640626	120680866	protein_coding	calcium binding protein 1	+	40241	61.4784	1.5851	0.24078	6.58319	4.60461e-11	4.07731e-10	up
ARSJ	chr4	113900284	113979647	protein_coding	arylsulfatase family member J	-	79364	77.3783	1.37856	0.209621	6.57646	4.81779e-11	4.25627e-10	up
FOXA3	chr19	45864326	45873797	protein_coding	forkhead box A3	+	9472	45.12	1.88686	0.287046	6.57335	4.91963e-11	4.33627e-10	up
FHAD1	chr1	15236521	15403010	protein_coding	forkhead associated phosphopeptide binding domain 1	+	166490	49.5652	1.77874	0.270864	6.56689	5.13782e-11	4.51203e-10	up
C2CD4C	chr19	405445	409147	protein_coding	C2 calcium dependent domain containing 4C	-	3703	57.0811	1.64891	0.251156	6.5653	5.19291e-11	4.55625e-10	up
PDE3A	chr12	20368537	20688583	protein_coding	phosphodiesterase 3A	+	320047	67.7187	1.50449	0.229337	6.56019	5.37409e-11	4.70233e-10	up
RBM24	chr6	17281361	17293871	protein_coding	RNA binding motif protein 24	+	12511	31.5965	2.44708	0.373125	6.55834	5.441e-11	4.75654e-10	up
ENTPD2	chr9	137048107	137054061	protein_coding	ectonucleoside triphosphate diphosphohydrolase 2	-	5955	22.2138	3.89706	0.594381	6.5565	5.50869e-11	4.81134e-10	up
PTGES	chr9	129738349	129753042	protein_coding	prostaglandin E synthase	-	14694	55.6679	1.75309	0.26776	6.54726	5.86023e-11	5.10445e-10	up
PCDH8	chr13	52842889	52848640	protein_coding	protocadherin 8	-	5752	29.0353	2.87317	0.439246	6.54113	6.10544e-11	5.31082e-10	up
SLC8A3	chr14	70044215	70189405	protein_coding	solute carrier family 8 member A3	-	145191	25.8682	2.85325	0.436414	6.53794	6.2372e-11	5.41562e-10	up
PDE1A	chr2	182140041	182716797	protein_coding	phosphodiesterase 1A	-	576757	41.2173	2.00598	0.307244	6.52893	6.62425e-11	5.72582e-10	up
HLA-L	chr6	30259562	30266951	transcribed_pseudogene	major histocompatibility complex, class I, L (pseudogene)	+	7390	139.008	1.05211	0.161316	6.52206	6.93505e-11	5.98639e-10	up
GRM4	chr6	34018643	34155622	protein_coding	glutamate metabotropic receptor 4	-	136980	22.5929	3.42701	0.525551	6.52079	6.99375e-11	6.02893e-10	up
THSD4	chr15	71096894	71783383	protein_coding	thrombospondin type 1 domain containing 4	+	686490	124.657	1.04531	0.160534	6.51147	7.44207e-11	6.40105e-10	up
CHST8	chr19	33621953	33773509	protein_coding	carbohydrate sulfotransferase 8	+	151557	103.537	1.22021	0.187765	6.4986	8.10697e-11	6.95116e-10	up
MPPED1	chr22	43412014	43507848	protein_coding	metallophosphoesterase domain containing 1	+	95835	54.231	1.75233	0.270219	6.48485	8.88221e-11	7.57195e-10	up
CD40	chr20	46118314	46129858	protein_coding	CD40 molecule	+	11545	86.9484	1.25413	0.193679	6.47532	9.46133e-11	8.05492e-10	up
PRKG2	chr4	81087370	81217836	protein_coding	protein kinase cGMP-dependent 2	-	130467	82.9203	1.35975	0.210006	6.47482	9.49242e-11	8.07781e-10	up
KCNA3	chr1	110653560	110674940	protein_coding	potassium voltage-gated channel subfamily A member 3	-	21381	36.9956	2.10224	0.3248	6.4724	9.64596e-11	8.19757e-10	up
TRIM58	chr1	247857187	247880138	protein_coding	tripartite motif containing 58	+	22952	39.6077	1.97468	0.306103	6.45102	1.11101e-10	9.35089e-10	up
KCNJ3	chr2	154698695	154858354	protein_coding	potassium inwardly rectifying channel subfamily J member 3	+	159660	43.5313	1.85407	0.287475	6.44951	1.12211e-10	9.43603e-10	up
WNT7B	chr22	45920366	45977162	protein_coding	Wnt family member 7B	-	56797	26.5448	2.72139	0.421994	6.44888	1.12679e-10	9.46713e-10	up
TMEM200A	chr6	130365531	130443067	protein_coding	transmembrane protein 200A	+	77537	22.4593	3.28124	0.508829	6.44861	1.12881e-10	9.47991e-10	up
PAK5	chr20	9537370	9839076	protein_coding	p21 (RAC1) activated kinase 5	-	301707	28.3348	2.59779	0.402964	6.44671	1.14305e-10	9.59532e-10	up
COL4A3	chr2	227164624	227314792	protein_coding	collagen type IV alpha 3 chain	+	150169	37.5994	2.08861	0.32411	6.44414	1.16257e-10	9.75494e-10	up
MAN1C1	chr1	25616791	25784450	protein_coding	mannosidase alpha class 1C member 1	+	167660	70.2141	1.40849	0.218582	6.44376	1.1655e-10	9.77526e-10	up
IGSF11	chr3	118900557	119146020	protein_coding	immunoglobulin superfamily member 11	-	245464	66.5698	1.49065	0.231381	6.44239	1.17607e-10	9.85527e-10	up
LMO2	chr11	33858576	33892076	protein_coding	LIM domain only 2	-	33501	69.8934	1.39904	0.217317	6.43781	1.21211e-10	1.01352e-09	up
LOC729732	chr8	12537079	12665611	lncRNA	uncharacterized LOC729732	-	128533	119.744	1.08098	0.167915	6.43764	1.21343e-10	1.01418e-09	up
CHRM4	chr11	46383789	46391776	protein_coding	cholinergic receptor muscarinic 4	-	7988	30.4375	2.44728	0.380321	6.43478	1.23648e-10	1.03255e-09	up
LOC124900192	chr5	117454949	117479368	protein_coding	uncharacterized LOC124900192	+	24420	37.2901	2.11819	0.329474	6.429	1.28444e-10	1.07074e-09	up
CSDC2	chr22	41561010	41576666	protein_coding	cold shock domain containing C2	+	15657	59.2429	1.53484	0.239227	6.41583	1.40057e-10	1.16034e-09	up
SP110	chr2	230165186	230225636	protein_coding	SP110 nuclear body protein	-	60451	75.7338	1.37019	0.213564	6.41582	1.4007e-10	1.16034e-09	up
SLC5A5	chr19	17871945	17895174	protein_coding	solute carrier family 5 member 5	+	23230	33.5491	2.21836	0.347226	6.3888	1.67193e-10	1.37644e-09	up
MEGF6	chr1	3487951	3624786	protein_coding	multiple EGF like domains 6	-	136836	110.465	1.1451	0.179365	6.38421	1.72282e-10	1.41652e-09	up
FMN1	chr15	32765544	33194714	protein_coding	formin 1	-	429171	29.1727	2.43904	0.382195	6.38166	1.75182e-10	1.43913e-09	up
TOX	chr8	58805412	59119147	protein_coding	thymocyte selection associated high mobility group box	-	313736	37.642	2.04636	0.32076	6.37973	1.77404e-10	1.45676e-09	up
DISP2	chr15	40358219	40378621	protein_coding	dispatched RND transporter family member 2	+	20403	91.6251	1.32209	0.20724	6.3795	1.7767e-10	1.45832e-09	up
NKAIN1	chr1	31179745	31239887	protein_coding	sodium/potassium transporting ATPase interacting 1	-	60143	128.312	1.04291	0.163628	6.37369	1.84538e-10	1.51147e-09	up
BEGAIN	chr14	100537147	100587417	protein_coding	brain enriched guanylate kinase associated	-	50271	45.1052	1.85354	0.290969	6.37024	1.88735e-10	1.54387e-09	up
ACE	chr17	63477061	63498373	protein_coding	angiotensin I converting enzyme	+	21313	83.3489	1.25351	0.196893	6.36645	1.93456e-10	1.58114e-09	up
SLCO3A1	chr15	91853708	92172435	protein_coding	solute carrier organic anion transporter family member 3A1	+	318728	20.4828	3.97804	0.62505	6.36436	1.96107e-10	1.60212e-09	up
CRHR2	chr7	30651942	30700103	protein_coding	corticotropin releasing hormone receptor 2	-	48162	20.6366	4.2229	0.664162	6.35823	2.04085e-10	1.66377e-09	up
TGFA	chr2	70447284	70553826	protein_coding	transforming growth factor alpha	-	106543	45.6689	1.77913	0.279872	6.35693	2.05826e-10	1.67654e-09	up
AK7	chr14	96392128	96489427	protein_coding	adenylate kinase 7	+	97300	59.0738	1.53021	0.240759	6.3558	2.07341e-10	1.68744e-09	up
SPATA6	chr1	48261389	48472204	protein_coding	spermatogenesis associated 6	-	210816	128.485	1.01098	0.159382	6.34313	2.2515e-10	1.82466e-09	up
DTX4	chr11	59171430	59208588	protein_coding	deltex E3 ubiquitin ligase 4	+	37159	21.3007	3.65199	0.577037	6.32887	2.46969e-10	1.99057e-09	up
SERPINB9	chr6	2887270	2903309	protein_coding	serpin family B member 9	-	16040	96.2791	1.17812	0.186207	6.32692	2.50103e-10	2.01498e-09	up
OASL	chr12	121017761	121039246	protein_coding	2'-5'-oligoadenylate synthetase like	-	21486	21.1803	3.47436	0.549889	6.31829	2.64472e-10	2.12717e-09	up
NRG4	chr15	75935393	76060240	protein_coding	neuregulin 4	-	124848	100.494	1.20607	0.191259	6.30598	2.86377e-10	2.29281e-09	up
HPGD	chr4	174490175	174522893	protein_coding	15-hydroxyprostaglandin dehydrogenase	-	32719	80.8611	1.2948	0.205372	6.30465	2.88846e-10	2.3096e-09	up
TMEM171	chr5	73120575	73131809	protein_coding	transmembrane protein 171	+	11235	85.0203	1.2367	0.196492	6.29387	3.09654e-10	2.46683e-09	up
DENND6B	chr22	50309030	50327012	protein_coding	DENN domain containing 6B	-	17983	58.5904	1.51481	0.240707	6.29317	3.11055e-10	2.47697e-09	up
KCNJ10	chr1	160037467	160070160	protein_coding	potassium inwardly rectifying channel subfamily J member 10	-	32694	29.0092	2.42846	0.386026	6.29094	3.15555e-10	2.50864e-09	up
PLA2G7	chr6	46704201	46735721	protein_coding	phospholipase A2 group VII	-	31521	61.3896	1.49624	0.237875	6.29004	3.17388e-10	2.52217e-09	up
SPX	chr12	21526296	21532947	protein_coding	spexin hormone	+	6652	63.8192	1.48862	0.236871	6.28454	3.28829e-10	2.60877e-09	up
HOXA-AS3	chr7	27140364	27155928	lncRNA	HOXA cluster antisense RNA 3	+	15565	89.8119	-1.20656	0.192473	-6.26871	3.64043e-10	2.87273e-09	down
INHBB	chr2	120346136	120351803	protein_coding	inhibin subunit beta B	+	5668	57.4704	1.52175	0.24289	6.26519	3.72361e-10	2.93475e-09	up
EPHA10	chr1	37713880	37765120	protein_coding	EPH receptor A10	-	51241	90.5314	1.20376	0.192452	6.25488	3.97829e-10	3.13034e-09	up
CDH18	chr5	19471296	20575713	protein_coding	cadherin 18	-	1104418	23.1625	2.9692	0.4748	6.25358	4.01144e-10	3.15513e-09	up
WNT8B	chr10	100463009	100483744	protein_coding	Wnt family member 8B	+	20736	48.5864	1.79899	0.287906	6.24852	4.14351e-10	3.25102e-09	up
NELL1	chr11	20669551	21575686	protein_coding	neural EGFL like 1	+	906136	20.5122	3.58908	0.575033	6.24152	4.3334e-10	3.39032e-09	up
IKZF3	chr17	39757715	39864312	protein_coding	IKAROS family zinc finger 3	-	106598	88.1845	1.27099	0.203808	6.23624	4.48209e-10	3.50095e-09	up
BIK	chr22	43110750	43129712	protein_coding	BCL2 interacting killer	+	18963	37.5742	2.17578	0.348961	6.23504	4.51671e-10	3.52656e-09	up
PMEL	chr12	55954105	55966709	protein_coding	premelanosome protein	-	12605	54.3817	1.55622	0.250164	6.22082	4.94566e-10	3.84585e-09	up
TMEM163	chr2	134455759	134719000	protein_coding	transmembrane protein 163	-	263242	91.2957	1.27213	0.20456	6.21886	5.0078e-10	3.89259e-09	up
KISS1R	chr19	917333	921005	protein_coding	KISS1 receptor	+	3673	21.0497	4.86437	0.782717	6.21472	5.14168e-10	3.99342e-09	up
MAP2	chr2	209424047	209734112	protein_coding	microtubule associated protein 2	+	310066	43.7178	1.79518	0.288997	6.21174	5.23996e-10	4.06483e-09	up
CLMP	chr11	123069872	123195248	protein_coding	CXADR like membrane protein	-	125377	73.6191	1.37951	0.22254	6.19892	5.68534e-10	4.39259e-09	up
MRO	chr18	50795130	50825380	protein_coding	maestro	-	30251	33.2692	2.14983	0.347218	6.19159	5.95595e-10	4.5906e-09	up
GRID2IP	chr7	6496778	6551461	protein_coding	Grid2 interacting protein	-	54684	54.6801	1.56742	0.253283	6.18842	6.07693e-10	4.68009e-09	up
CYS1	chr2	10056473	10080411	protein_coding	cystin 1	-	23939	30.9373	2.35156	0.380139	6.18604	6.16933e-10	4.74555e-09	up
MYCN	chr2	15940550	15947004	protein_coding	MYCN proto-oncogene, bHLH transcription factor	+	6455	26.0606	2.61118	0.422437	6.18123	6.36036e-10	4.88857e-09	up
ETNPPL	chr4	108742053	108763053	protein_coding	ethanolamine-phosphate phospho-lyase	-	21001	71.7294	1.37842	0.223322	6.17234	6.72857e-10	5.16126e-09	up
SULT2B1	chr19	48552172	48599427	protein_coding	sulfotransferase family 2B member 1	+	47256	32.63	2.16767	0.351357	6.16941	6.85433e-10	5.25381e-09	up
FOXO6	chr1	41361434	41383590	protein_coding	forkhead box O6	+	22157	80.7019	1.26281	0.204721	6.16844	6.89674e-10	5.28182e-09	up
RAB38	chr11	87803715	88175443	protein_coding	RAB38, member RAS oncogene family	-	371729	43.5816	1.75571	0.284679	6.16733	6.94547e-10	5.31702e-09	up
CORO2B	chr15	68518373	68727806	protein_coding	coronin 2B	+	209434	89.7962	1.18579	0.192407	6.16292	7.14141e-10	5.4605e-09	up
TLL1	chr4	165873237	166104457	protein_coding	tolloid like 1	+	231221	59.7639	1.5067	0.24505	6.14855	7.81921e-10	5.9527e-09	up
DCLK3	chr3	36712421	36764553	protein_coding	doublecortin like kinase 3	-	52133	20.7269	3.15207	0.514023	6.13216	8.66937e-10	6.57387e-09	up
FAM95A	chr2	94755326	94761184	lncRNA	family with sequence similarity 95 member A	-	5859	80.1304	1.23185	0.201122	6.12487	9.07598e-10	6.86324e-09	up
C1orf167	chr1	11762193	11789585	protein_coding	chromosome 1 open reading frame 167	+	27393	31.9381	2.18483	0.357192	6.11668	9.55442e-10	7.20802e-09	up
LAMP5	chr20	9514590	9530524	protein_coding	lysosomal associated membrane protein family member 5	+	15935	19.5511	3.90573	0.639405	6.10839	1.00644e-09	7.58082e-09	up
DLL4	chr15	40929340	40939073	protein_coding	delta like canonical Notch ligand 4	+	9734	37.8646	1.89258	0.30993	6.10647	1.01858e-09	7.66925e-09	up
MAGI2	chr7	78017055	79453667	protein_coding	membrane associated guanylate kinase, WW and PDZ domain containing 2	-	1436613	93.704	1.18243	0.193715	6.10396	1.03471e-09	7.78466e-09	up
OBSCN-AS1	chr1	228203506	228213664	lncRNA	OBSCN antisense RNA 1	-	10159	49.629	1.61351	0.264408	6.10237	1.04508e-09	7.85652e-09	up
OSMR	chr5	38846012	38945579	protein_coding	oncostatin M receptor	+	99568	78.8311	1.25777	0.206153	6.10118	1.05287e-09	7.90991e-09	up
ATL1	chr14	50533082	50633068	protein_coding	atlastin GTPase 1	+	99987	115.443	1.04175	0.170977	6.09291	1.10874e-09	8.30759e-09	up
C15orf48	chr15	45430610	45433340	protein_coding	chromosome 15 open reading frame 48	+	2731	21.6651	3.09619	0.508432	6.08969	1.13129e-09	8.46482e-09	up
GRAMD2B	chr5	126360120	126494364	protein_coding	GRAM domain containing 2B	+	134245	60.263	1.45911	0.239624	6.08916	1.13503e-09	8.48621e-09	up
THSD7A	chr7	11370365	11832198	protein_coding	thrombospondin type 1 domain containing 7A	-	461834	44.0572	1.74417	0.286821	6.08103	1.19411e-09	8.89336e-09	up
CCN3	chr8	119416446	119424434	protein_coding	cellular communication network factor 3	+	7989	18.9286	3.64907	0.600769	6.074	1.24761e-09	9.27741e-09	up
CCDC88B	chr11	64340204	64357534	protein_coding	coiled-coil domain containing 88B	+	17331	63.9909	1.57892	0.26017	6.06879	1.28877e-09	9.57236e-09	up
KLHDC8A	chr1	205336061	205357039	protein_coding	kelch domain containing 8A	-	20979	24.6426	2.59858	0.428355	6.06642	1.30796e-09	9.71114e-09	up
HDAC9	chr7	18086825	19002416	protein_coding	histone deacetylase 9	+	915592	60.5608	1.55343	0.25609	6.06596	1.31167e-09	9.73495e-09	up
ERICH5	chr8	98064568	98093609	protein_coding	glutamate rich 5	+	29042	120.209	1.02194	0.168569	6.06247	1.34047e-09	9.93717e-09	up
KCNJ2	chr17	70169532	70180044	protein_coding	potassium inwardly rectifying channel subfamily J member 2	+	10513	23.5071	2.6967	0.4459	6.04778	1.46859e-09	1.08493e-08	up
COL9A3	chr20	62816213	62841159	protein_coding	collagen type IX alpha 3 chain	+	24947	89.4677	1.16532	0.192809	6.04392	1.50414e-09	1.10905e-08	up
HOXA10-HOXA9	chr7	27162438	27180261	lncRNA	HOXA10-HOXA9 readthrough	-	17824	28.6291	-2.22208	0.36805	-6.03745	1.56571e-09	1.15312e-08	down
MATN3	chr2	19992052	20012668	protein_coding	matrilin 3	-	20617	43.2772	1.7104	0.283343	6.0365	1.57492e-09	1.15913e-08	up
TSPAN2	chr1	115048011	115089503	protein_coding	tetraspanin 2	-	41493	107.174	1.06015	0.175671	6.03487	1.59094e-09	1.16992e-08	up
AVPR1A	chr12	63142759	63151201	protein_coding	arginine vasopressin receptor 1A	-	8443	20.4095	3.12751	0.518776	6.02863	1.65354e-09	1.21455e-08	up
ATOH1	chr4	93828753	93830964	protein_coding	atonal bHLH transcription factor 1	+	2212	34.9468	1.95557	0.324668	6.0233	1.70896e-09	1.25383e-08	up
ARHGAP20	chr11	110577043	110713189	protein_coding	Rho GTPase activating protein 20	-	136147	112.639	1.02002	0.169486	6.01831	1.76246e-09	1.29209e-08	up
DCN	chr12	91140484	91182817	protein_coding	decorin	-	42334	21.5329	5.32421	0.8855	6.01267	1.82496e-09	1.33435e-08	up
LGALS1	chr22	37675636	37679802	protein_coding	galectin 1	+	4167	65.5362	1.38263	0.230166	6.00709	1.88884e-09	1.37843e-08	up
MAK	chr6	10762723	10838539	protein_coding	male germ cell associated kinase	-	75817	112.538	1.09079	0.181588	6.00694	1.89061e-09	1.3792e-08	up
MYOD1	chr11	17719571	17722136	protein_coding	myogenic differentiation 1	+	2566	18.4177	3.81369	0.636196	5.99453	2.04077e-09	1.48255e-08	up
TMEM92	chr17	50271406	50281485	protein_coding	transmembrane protein 92	+	10080	30.1702	2.24999	0.375628	5.98995	2.09907e-09	1.52317e-08	up
FGF5	chr4	80266588	80291017	protein_coding	fibroblast growth factor 5	+	24430	40.9999	1.81114	0.302812	5.98105	2.21698e-09	1.60389e-08	up
TMEM169	chr2	216081919	216102783	protein_coding	transmembrane protein 169	+	20865	46.5253	1.74954	0.292693	5.97738	2.26761e-09	1.63805e-08	up
CDK5R2	chr2	218959666	218962155	protein_coding	cyclin dependent kinase 5 regulatory subunit 2	+	2490	23.0363	2.66076	0.445361	5.97438	2.30963e-09	1.66595e-08	up
GASK1B	chr4	158124474	158173025	protein_coding	golgi associated kinase 1B	-	48552	19.3019	4.73557	0.793316	5.96933	2.38224e-09	1.71441e-08	up
CYP4X1	chr1	46961364	47055432	protein_coding	cytochrome P450 family 4 subfamily X member 1	+	94069	41.1616	1.74972	0.293289	5.96588	2.4332e-09	1.74977e-08	up
TLR6	chr4	38822897	38868390	protein_coding	toll like receptor 6	-	45494	51.6521	1.53093	0.256865	5.96008	2.52122e-09	1.81103e-08	up
IFI6	chr1	27666064	27672192	protein_coding	interferon alpha inducible protein 6	-	6129	77.9148	1.26784	0.212894	5.95527	2.5964e-09	1.86086e-08	up
ABCB4	chr7	87365896	87476027	protein_coding	ATP binding cassette subfamily B member 4	-	110132	49.1295	1.64765	0.276918	5.94996	2.6821e-09	1.92157e-08	up
PLCL1	chr2	197804593	198149863	protein_coding	phospholipase C like 1 (inactive)	+	345271	90.8983	1.1848	0.199139	5.9496	2.68794e-09	1.92504e-08	up
ATOH8	chr2	85753991	85791383	protein_coding	atonal bHLH transcription factor 8	+	37393	33.4881	2.01577	0.338828	5.94924	2.69384e-09	1.92854e-08	up
TMEM179	chr14	104590864	104604772	protein_coding	transmembrane protein 179	-	13909	96.9109	1.09326	0.183812	5.94771	2.71918e-09	1.94452e-08	up
TMEM151A	chr11	66291894	66296664	protein_coding	transmembrane protein 151A	+	4771	21.3985	2.84122	0.477782	5.94668	2.73632e-09	1.95531e-08	up
PSMB9	chr6	32854192	32859851	protein_coding	proteasome 20S subunit beta 9	+	5660	19.5965	3.20103	0.538629	5.94292	2.79987e-09	1.99627e-08	up
SEMA3B	chr3	50267652	50277546	protein_coding	semaphorin 3B	+	9895	63.264	1.35155	0.227487	5.94122	2.82914e-09	2.01564e-08	up
TMEM130	chr7	98846490	98870014	protein_coding	transmembrane protein 130	-	23525	27.6047	2.27818	0.383705	5.93732	2.89712e-09	2.06178e-08	up
MTMR11	chr1	149928651	149936879	protein_coding	myotubularin related protein 11	-	8229	93.9054	1.13701	0.191613	5.93388	2.9585e-09	2.1008e-08	up
SNTG2-AS1	chr2	949634	951392	lncRNA	SNTG2 antisense RNA 1	-	1759	98.0456	1.10604	0.186394	5.93389	2.95833e-09	2.1008e-08	up
FAM78B	chr1	166055918	166167001	protein_coding	family with sequence similarity 78 member B	-	111084	23.0079	2.85197	0.481492	5.9232	3.15732e-09	2.23537e-08	up
DLG5-AS1	chr10	77926812	77929825	lncRNA	DLG5 antisense RNA 1	+	3014	41.9759	1.75239	0.295922	5.92179	3.18458e-09	2.25218e-08	up
DNER	chr2	229357629	229714555	protein_coding	delta/notch like EGF repeat containing	-	356927	19.5976	3.20126	0.540898	5.91841	3.25069e-09	2.29639e-08	up
RASSF6	chr4	73571550	73620631	protein_coding	Ras association domain family member 6	-	49082	34.472	1.9311	0.326493	5.91467	3.32535e-09	2.34655e-08	up
SLC15A1	chr13	98683801	98752672	protein_coding	solute carrier family 15 member 1	-	68872	18.9676	3.29969	0.558055	5.91284	3.36251e-09	2.36929e-08	up
HCRTR2	chr6	55106469	55284713	protein_coding	hypocretin receptor 2	+	178245	17.9705	3.77486	0.638972	5.90771	3.46898e-09	2.44252e-08	up
LOC105371240	chr16	48623437	48748330	lncRNA	uncharacterized LOC105371240	+	124894	30.0526	2.18501	0.370231	5.90174	3.59693e-09	2.52798e-08	up
RUNX3	chr1	24899511	24965138	protein_coding	RUNX family transcription factor 3	-	65628	72.1566	1.37648	0.233345	5.89891	3.65908e-09	2.57072e-08	up
OPRD1	chr1	28812170	28871267	protein_coding	opioid receptor delta 1	+	59098	89.1083	1.17013	0.198639	5.89075	3.84446e-09	2.6921e-08	up
SETBP1	chr18	44680073	45068510	protein_coding	SET binding protein 1	+	388438	111.537	1.02792	0.175004	5.87368	4.26228e-09	2.96094e-08	up
GFY	chr19	49423747	49428987	protein_coding	golgi associated olfactory signaling regulator	+	5241	21.9108	2.67361	0.455655	5.86762	4.42084e-09	3.05893e-08	up
CHST4	chr16	71526120	71538748	protein_coding	carbohydrate sulfotransferase 4	+	12629	45.5721	1.62251	0.276619	5.8655	4.47773e-09	3.09495e-08	up
LGALS3	chr14	55129252	55145430	protein_coding	galectin 3	+	16179	81.6695	1.16782	0.199182	5.86306	4.54427e-09	3.13981e-08	up
DRAM1	chr12	101877580	101923612	protein_coding	DNA damage regulated autophagy modulator 1	+	46033	83.8129	1.16417	0.198708	5.85867	4.66586e-09	3.21919e-08	up
SCN1A	chr2	165984641	166149161	protein_coding	sodium voltage-gated channel alpha subunit 1	-	164521	14.3613	7.21926	1.2328	5.85596	4.74255e-09	3.26807e-08	up
MLC1	chr22	50059391	50085875	protein_coding	modulator of VRAC current 1	-	26485	75.8736	1.24299	0.21227	5.8557	4.74994e-09	3.27016e-08	up
NEFH	chr22	29480218	29491390	protein_coding	neurofilament heavy chain	+	11173	27.2872	2.25805	0.385748	5.8537	4.80756e-09	3.30509e-08	up
SLC35F3	chr1	233904676	234324511	protein_coding	solute carrier family 35 member F3	+	419836	21.8738	2.87562	0.492466	5.83923	5.24426e-09	3.59118e-08	up
ATP2B2	chr3	10324023	10708007	protein_coding	ATPase plasma membrane Ca2+ transporting 2	-	383985	19.7895	5.19999	0.890947	5.83647	5.33182e-09	3.64984e-08	up
TTLL6	chr17	48762234	48817229	protein_coding	tubulin tyrosine ligase like 6	-	54996	20.2664	2.98859	0.512307	5.83358	5.42491e-09	3.70564e-08	up
TCL1B	chr14	95686426	95692628	protein_coding	TCL1 family AKT coactivator B	+	6203	23.2082	2.5838	0.443191	5.82999	5.54293e-09	3.78357e-08	up
VSIR	chr10	71747556	71773520	protein_coding	V-set immunoregulatory receptor	-	25965	30.2219	2.08606	0.358271	5.82258	5.79446e-09	3.95105e-08	up
SNCAIP	chr5	122311353	122464219	protein_coding	synuclein alpha interacting protein	+	152867	55.932	1.42249	0.244329	5.82203	5.81376e-09	3.96281e-08	up
P2RX2	chr12	132618776	132622388	protein_coding	purinergic receptor P2X 2	+	3613	66.1587	1.38177	0.23739	5.8207	5.86028e-09	3.99097e-08	up
IL21R	chr16	27402174	27452042	protein_coding	interleukin 21 receptor	+	49869	17.2928	4.2317	0.727137	5.81967	5.89646e-09	4.01064e-08	up
NKX2-1	chr14	36516397	36520232	protein_coding	NK2 homeobox 1	-	3836	75.0937	1.22211	0.209994	5.81972	5.89458e-09	4.01064e-08	up
CERKL	chr2	181536672	181657105	protein_coding	ceramide kinase like	-	120434	31.498	2.05578	0.353686	5.81245	6.15669e-09	4.16845e-08	up
BDNF	chr11	27654893	27722030	protein_coding	brain derived neurotrophic factor	-	67138	17.89	4.621	0.795115	5.81173	6.18287e-09	4.18323e-08	up
TRHDE	chr12	72087266	72670758	protein_coding	thyrotropin releasing hormone degrading enzyme	+	583493	58.3729	1.43956	0.247879	5.80748	6.34187e-09	4.28628e-08	up
FRRS1L	chr9	109130293	109167249	protein_coding	ferric chelate reductase 1 like	-	36957	69.6719	1.28707	0.221873	5.80092	6.59511e-09	4.44962e-08	up
CELF4	chr18	37242844	37565798	protein_coding	CUGBP Elav-like family member 4	-	322955	56.4284	1.39545	0.240917	5.79223	6.9457e-09	4.67303e-08	up
UTF1	chr10	133230217	133231558	protein_coding	undifferentiated embryonic cell transcription factor 1	+	1342	21.4134	2.73607	0.473568	5.77756	7.57917e-09	5.07645e-08	up
IKZF1	chr7	50303455	50405101	protein_coding	IKAROS family zinc finger 1	+	101647	23.228	2.49743	0.432822	5.7701	7.92251e-09	5.28764e-08	up
NANOS1	chr10	119029714	119033730	protein_coding	nanos C2HC-type zinc finger 1	+	4017	104.245	-1.04205	0.180695	-5.7669	8.07409e-09	5.38506e-08	down
RDH12	chr14	67701886	67734451	protein_coding	retinol dehydrogenase 12	+	32566	29.2671	2.13952	0.371472	5.75957	8.43265e-09	5.60669e-08	up
HSD17B14	chr19	48813018	48836491	protein_coding	hydroxysteroid 17-beta dehydrogenase 14	-	23474	68.9608	1.32068	0.229611	5.75183	8.82851e-09	5.85976e-08	up
RAB37	chr17	74671131	74747335	protein_coding	RAB37, member RAS oncogene family	+	76205	16.6829	3.89833	0.677808	5.75139	8.85136e-09	5.87289e-08	up
LOC105379241	chr8	11552486	11558265	lncRNA	uncharacterized LOC105379241	-	5780	31.2229	1.98742	0.346067	5.74288	9.30775e-09	6.15609e-08	up
PDE4B	chr1	65792510	66374579	protein_coding	phosphodiesterase 4B	+	582070	44.2838	1.68734	0.293885	5.7415	9.38438e-09	6.20086e-08	up
CCKBR	chr11	6259838	6272127	protein_coding	cholecystokinin B receptor	+	12290	48.1978	1.55708	0.271419	5.73679	9.64865e-09	6.3558e-08	up
CELF5	chr19	3224661	3297076	protein_coding	CUGBP Elav-like family member 5	+	72416	76.2953	1.19111	0.207866	5.73019	1.00319e-08	6.59694e-08	up
RPRML	chr17	46978156	46979253	protein_coding	reprimo like	-	1098	63.9253	1.31516	0.22962	5.72756	1.01887e-08	6.69318e-08	up
DLK2	chr6	43450352	43456632	protein_coding	delta like non-canonical Notch ligand 2	-	6281	88.0188	1.11862	0.195441	5.72355	1.04322e-08	6.83682e-08	up
DEPP1	chr10	44976128	44978809	protein_coding	DEPP autophagy regulator 1	-	2682	87.832	-1.15962	0.20328	-5.70455	1.16651e-08	7.60557e-08	down
UBE2QL1	chr5	6448859	6496723	protein_coding	ubiquitin conjugating enzyme E2 Q family like 1	+	47865	88.7912	1.09552	0.192045	5.7045	1.16686e-08	7.60557e-08	up
DGKG	chr3	186147201	186362234	protein_coding	diacylglycerol kinase gamma	-	215034	16.6713	3.89778	0.683442	5.70317	1.17603e-08	7.66012e-08	up
ANXA1	chr9	73151865	73170393	protein_coding	annexin A1	+	18529	106.544	1.00213	0.175988	5.69432	1.23863e-08	8.05694e-08	up
AMER2	chr13	25161679	25172288	protein_coding	APC membrane recruitment protein 2	-	10610	18.1776	3.08102	0.54129	5.69199	1.25568e-08	8.15684e-08	up
SRRM3	chr7	76201896	76287287	protein_coding	serine/arginine repetitive matrix 3	+	85392	115.218	1.01022	0.17794	5.67731	1.36826e-08	8.82548e-08	up
NKX3-1	chr8	23678693	23682938	protein_coding	NK3 homeobox 1	-	4246	72.6869	1.20351	0.212546	5.66235	1.49317e-08	9.59898e-08	up
LIMS2	chr2	127638426	127681786	protein_coding	LIM zinc finger domain containing 2	-	43361	42.8465	1.59593	0.28218	5.6557	1.55215e-08	9.9548e-08	up
PRR36	chr19	7868719	7874390	protein_coding	proline rich 36	-	5672	107.712	1.02927	0.182247	5.64767	1.62633e-08	1.04201e-07	up
SCN2B	chr11	118162806	118176639	protein_coding	sodium voltage-gated channel beta subunit 2	-	13834	52.4792	1.46388	0.259243	5.64677	1.63486e-08	1.04713e-07	up
COL11A1	chr1	102876473	103108522	protein_coding	collagen type XI alpha 1 chain	-	232050	16.3375	4.14535	0.734387	5.64465	1.6552e-08	1.05804e-07	up
ZBTB20	chr3	114314500	115147288	protein_coding	zinc finger and BTB domain containing 20	-	832789	59.82	1.36267	0.241903	5.63311	1.76984e-08	1.12757e-07	up
GDF6	chr8	96142333	96160806	protein_coding	growth differentiation factor 6	-	18474	71.8872	1.21248	0.216212	5.6078	2.04911e-08	1.29775e-07	up
LOC105375690	chr8	103481280	103501910	lncRNA	uncharacterized LOC105375690	-	20631	16.2268	3.61614	0.644965	5.60673	2.06191e-08	1.30499e-07	up
LOC124901321	chr6	43990827	43999554	lncRNA	uncharacterized LOC124901321	+	8728	46.7923	1.49915	0.268135	5.59102	2.25733e-08	1.42352e-07	up
SOX1-OT	chr13	111972310	112108015	lncRNA	SOX1 overlapping transcript	+	135706	17.2077	3.14665	0.563517	5.58396	2.35109e-08	1.4807e-07	up
SEC14L5	chr16	4958330	5019157	protein_coding	SEC14 like lipid binding 5	+	60828	26.9911	2.11518	0.378895	5.5825	2.37089e-08	1.49219e-07	up
MAGEL2	chr15	23643549	23647867	protein_coding	MAGE family member L2	-	4319	15.7119	4.08764	0.732372	5.58137	2.3863e-08	1.50091e-07	up
EGF	chr4	109912883	110013766	protein_coding	epidermal growth factor	+	100884	34.0505	1.82063	0.32668	5.57312	2.50213e-08	1.56914e-07	up
GRIK3	chr1	36795527	37034515	protein_coding	glutamate ionotropic receptor kainate type subunit 3	-	238989	17.2224	3.14676	0.566361	5.55609	2.75877e-08	1.72446e-07	up
FILIP1	chr6	75291859	75493800	protein_coding	filamin A interacting protein 1	-	201942	27.4896	2.14604	0.38635	5.55466	2.78152e-08	1.73755e-07	up
CD34	chr1	207880972	207911125	protein_coding	CD34 molecule	-	30154	38.9434	1.67988	0.302581	5.55184	2.82678e-08	1.7641e-07	up
FAM163A	chr1	179727776	179816198	protein_coding	family with sequence similarity 163 member A	+	88423	40.9093	1.6031	0.288828	5.55036	2.85086e-08	1.77797e-07	up
LOC105373485	chr2	13519497	13533206	lncRNA	uncharacterized LOC105373485	-	13710	52.1836	1.42669	0.25729	5.54505	2.9387e-08	1.8286e-07	up
NCAN	chr19	19211958	19252233	protein_coding	neurocan	+	40276	22.895	2.47597	0.44919	5.51207	3.54632e-08	2.18897e-07	up
ACP3	chr3	132317407	132368302	protein_coding	acid phosphatase 3	+	50896	29.6226	1.94377	0.35276	5.51018	3.58464e-08	2.21191e-07	up
MAPK15	chr8	143716349	143722458	protein_coding	mitogen-activated protein kinase 15	+	6110	112.062	1.03027	0.187246	5.50224	3.74996e-08	2.31169e-07	up
HRH1	chr3	11137238	11263557	protein_coding	histamine receptor H1	+	126320	16.4062	3.2382	0.588683	5.50076	3.78156e-08	2.32968e-07	up
TM6SF1	chr15	83107645	83137408	protein_coding	transmembrane 6 superfamily member 1	+	29764	30.9494	1.87311	0.340525	5.50065	3.78397e-08	2.33042e-07	up
LOC124904601	chr1	241357252	241361606	lncRNA	uncharacterized LOC124904601	+	4355	18.3665	2.82652	0.513864	5.50052	3.78671e-08	2.33135e-07	up
TMEM255B	chr13	113759226	113816995	protein_coding	transmembrane protein 255B	+	57770	19.3495	2.67426	0.486218	5.50013	3.79516e-08	2.33581e-07	up
RAET1G	chr6	149916878	149923121	protein_coding	retinoic acid early transcript 1G	-	6244	54.0092	1.37654	0.250337	5.49875	3.82489e-08	2.35335e-07	up
RPLP0P2	chr11	61615036	61639449	transcribed_pseudogene	ribosomal protein lateral stalk subunit P0 pseudogene 2	+	24414	19.182	2.77342	0.505306	5.48858	4.05167e-08	2.48572e-07	up
ODAD3	chr19	11420605	11435782	protein_coding	outer dynein arm docking complex subunit 3	-	15178	71.0722	1.17317	0.213918	5.48417	4.15409e-08	2.54449e-07	up
SLC1A2	chr11	35251205	35420507	protein_coding	solute carrier family 1 member 2	-	169303	15.588	3.55379	0.649125	5.47474	4.38146e-08	2.67609e-07	up
ZSCAN18	chr19	58083842	58118426	protein_coding	zinc finger and SCAN domain containing 18	-	34585	84.4915	1.0854	0.198354	5.47202	4.44939e-08	2.71585e-07	up
CSGALNACT1	chr8	19404161	19757908	protein_coding	chondroitin sulfate N-acetylgalactosaminyltransferase 1	-	353748	23.5835	2.28347	0.41745	5.47005	4.49912e-08	2.74447e-07	up
EML2-AS1	chr19	45641494	45642840	lncRNA	EML2 antisense RNA 1	+	1347	49.7838	1.40748	0.257511	5.46572	4.6103e-08	2.80694e-07	up
PDE7B	chr6	135851701	136195574	protein_coding	phosphodiesterase 7B	+	343874	22.6257	2.36966	0.433554	5.46565	4.61209e-08	2.80714e-07	up
LMCD1	chr3	8501823	8574668	protein_coding	LIM and cysteine rich domains 1	+	72846	76.3388	1.13189	0.207663	5.45062	5.0195e-08	3.04258e-07	up
IL10RA	chr11	117986394	118003037	protein_coding	interleukin 10 receptor subunit alpha	+	16644	42.2214	1.56821	0.287857	5.44787	5.09768e-08	3.08636e-07	up
LAMP3	chr3	183122215	183163813	protein_coding	lysosomal associated membrane protein 3	-	41599	57.2506	1.35989	0.250295	5.43316	5.53658e-08	3.34125e-07	up
ST8SIA6	chr10	17315421	17454595	protein_coding	ST8 alpha-N-acetyl-neuraminide alpha-2,8-sialyltransferase 6	-	139175	20.328	2.54879	0.469419	5.42968	5.64561e-08	3.40491e-07	up
ARHGEF37	chr5	149551625	149634968	protein_coding	Rho guanine nucleotide exchange factor 37	+	83344	59.281	1.27943	0.235639	5.42961	5.64772e-08	3.40511e-07	up
LOC124904428	chr1	154671592	154679835	lncRNA	uncharacterized LOC124904428	+	8244	31.1163	1.92922	0.355541	5.42615	5.75828e-08	3.46742e-07	up
FGFBP1	chr4	15935577	15938740	protein_coding	fibroblast growth factor binding protein 1	-	3164	44.67	1.52462	0.281388	5.41819	6.02041e-08	3.62186e-07	up
ZNF469	chr16	88100931	88440753	protein_coding	zinc finger protein 469	+	339823	22.1408	2.33254	0.430581	5.4172	6.05407e-08	3.64097e-07	up
LHX9	chr1	197912464	197935478	protein_coding	LIM homeobox 9	+	23015	62.8988	1.22367	0.226371	5.40562	6.45853e-08	3.86847e-07	up
DES	chr2	219418377	219426734	protein_coding	desmin	+	8358	21.1533	2.42578	0.448945	5.40328	6.54326e-08	3.91678e-07	up
LOC124902216	chr9	93955526	93980654	lncRNA	uncharacterized LOC124902216	+	25129	24.0914	2.1754	0.402944	5.39875	6.71068e-08	4.0145e-07	up
F5	chr1	169511951	169586481	protein_coding	coagulation factor V	-	74531	15.8407	4.86954	0.902871	5.39339	6.91408e-08	4.12975e-07	up
ALDH8A1	chr6	134917393	134950101	protein_coding	aldehyde dehydrogenase 8 family member A1	-	32709	40.2386	1.63738	0.30363	5.39268	6.94163e-08	4.14492e-07	up
P3H2	chr3	189956728	190122278	protein_coding	prolyl 3-hydroxylase 2	-	165551	65.0307	1.23506	0.22918	5.38905	7.08324e-08	4.22029e-07	up
CPED1	chr7	120988711	121297442	protein_coding	cadherin like and PC-esterase domain containing 1	+	308732	18.539	2.72051	0.50487	5.38853	7.10348e-08	4.22973e-07	up
SATB2-AS1	chr2	199468098	199472758	lncRNA	SATB2 antisense RNA 1	+	4661	15.0258	-3.26049	0.605199	-5.38747	7.14581e-08	4.25362e-07	down
NR2E1	chr6	108166022	108188809	protein_coding	nuclear receptor subfamily 2 group E member 1	+	22788	31.5671	1.86361	0.346148	5.38387	7.29021e-08	4.33152e-07	up
CHD5	chr1	6101787	6180321	protein_coding	chromodomain helicase DNA binding protein 5	-	78535	54.8532	1.3165	0.244699	5.38007	7.44553e-08	4.41561e-07	up
CCDC68	chr18	54901509	54959461	protein_coding	coiled-coil domain containing 68	-	57953	54.221	1.33741	0.249096	5.36908	7.91384e-08	4.67459e-07	up
MISP3	chr19	14072786	14075062	protein_coding	MISP family member 3	+	2277	26.1972	2.06256	0.384296	5.36712	8.00032e-08	4.72132e-07	up
LIPG	chr18	49561479	49599185	protein_coding	lipase G, endothelial type	+	37707	19.5377	2.5828	0.481559	5.36341	8.16634e-08	4.80895e-07	up
TLR5	chr1	223109404	223143248	protein_coding	toll like receptor 5	-	33845	34.5646	1.72233	0.3215	5.35715	8.45445e-08	4.97252e-07	up
SH2D3C	chr9	127738317	127778666	protein_coding	SH2 domain containing 3C	-	40350	18.707	2.7341	0.510409	5.35669	8.47597e-08	4.98366e-07	up
LOC101929322	chr7	65492335	65555065	transcribed_pseudogene	integrator complex subunit 4 pseudogene	-	62731	20.5007	2.46545	0.460464	5.35429	8.58943e-08	5.04727e-07	up
ADGRA1	chr10	133087924	133131675	protein_coding	adhesion G protein-coupled receptor A1	+	43752	14.5954	4.31347	0.80584	5.35277	8.66186e-08	5.08672e-07	up
GABBR2	chr9	98288109	98708935	protein_coding	gamma-aminobutyric acid type B receptor subunit 2	-	420827	82.1408	1.07943	0.202105	5.34095	9.24632e-08	5.41011e-07	up
ST8SIA4	chr5	100806933	100903282	protein_coding	ST8 alpha-N-acetyl-neuraminide alpha-2,8-sialyltransferase 4	-	96350	82.7921	1.05479	0.197698	5.33536	9.53568e-08	5.57093e-07	up
FIGNL2	chr12	51817899	51848718	protein_coding	fidgetin like 2	-	30820	17.7067	2.89913	0.54364	5.33281	9.67036e-08	5.64447e-07	up
RASGRP1	chr15	38488103	38564814	protein_coding	RAS guanyl releasing protein 1	-	76712	71.2841	1.19372	0.223873	5.33213	9.70683e-08	5.66404e-07	up
MFSD4A-AS1	chr1	205554272	205569305	lncRNA	MFSD4A antisense RNA 1	-	15034	19.5313	2.58334	0.484565	5.33126	9.7532e-08	5.68937e-07	up
HOXA2	chr7	27100354	27102683	protein_coding	homeobox A2	-	2330	55.8811	-1.26593	0.237617	-5.32759	9.95236e-08	5.79499e-07	down
SLC9A2	chr2	102619553	102711355	protein_coding	solute carrier family 9 member A2	+	91803	71.3056	1.13079	0.21248	5.32186	1.02711e-07	5.9661e-07	up
ITGA11	chr15	68296532	68432163	protein_coding	integrin subunit alpha 11	-	135632	23.2961	2.18782	0.411301	5.31926	1.04188e-07	6.04463e-07	up
ABLIM2	chr4	7965327	8158813	protein_coding	actin binding LIM protein family member 2	-	193487	52.4214	1.33871	0.251708	5.31852	1.04616e-07	6.06577e-07	up
ERAP2	chr5	96875939	96919716	protein_coding	endoplasmic reticulum aminopeptidase 2	+	43778	35.231	1.67766	0.315672	5.31457	1.06911e-07	6.18762e-07	up
HBQ1	chr16	180459	181179	protein_coding	hemoglobin subunit theta 1	+	721	56.9536	1.30464	0.2458	5.30773	1.10998e-07	6.41453e-07	up
YBX2	chr17	7288263	7294639	protein_coding	Y-box binding protein 2	-	6377	32.7835	1.75045	0.330171	5.30164	1.14766e-07	6.62431e-07	up
ANKRD24	chr19	4182689	4224814	protein_coding	ankyrin repeat domain 24	+	42126	54.857	1.31704	0.248753	5.29457	1.19298e-07	6.86525e-07	up
COL6A6	chr3	130516720	130677042	protein_coding	collagen type VI alpha 6 chain	+	160323	28.3471	1.91656	0.362216	5.29121	1.2151e-07	6.98419e-07	up
ALPK2	chr18	58481247	58629091	protein_coding	alpha kinase 2	-	147845	20.3418	2.45375	0.464047	5.28772	1.23852e-07	7.11032e-07	up
ADAMTS6	chr5	65148738	65481920	protein_coding	ADAM metallopeptidase with thrombospondin type 1 motif 6	-	333183	86.7194	1.03383	0.195636	5.28445	1.26086e-07	7.22129e-07	up
FOXC2	chr16	86566829	86569728	protein_coding	forkhead box C2	+	2900	32.3407	1.90983	0.361609	5.28147	1.28151e-07	7.33516e-07	up
KATNAL2	chr18	46917594	47102243	protein_coding	katanin catalytic subunit A1 like 2	+	184650	81.1843	1.05447	0.200152	5.26833	1.37668e-07	7.85884e-07	up
FEZF1-AS1	chr7	122303658	122310077	lncRNA	FEZF1 antisense RNA 1	+	6420	37.5031	1.60976	0.305852	5.2632	1.4157e-07	8.06724e-07	up
GOLGA7B	chr10	97849843	97871578	protein_coding	golgin A7 family member B	+	21736	29.4932	1.93544	0.36802	5.25906	1.44796e-07	8.23755e-07	up
LRRC32	chr11	76657524	76670747	protein_coding	leucine rich repeat containing 32	-	13224	31.6466	1.77173	0.337589	5.24817	1.53619e-07	8.70736e-07	up
CBR3	chr21	36135079	36146562	protein_coding	carbonyl reductase 3	+	11484	78.5642	1.05613	0.202244	5.22206	1.76947e-07	9.96494e-07	up
POU4F2	chr4	146638893	146642474	protein_coding	POU class 4 homeobox 2	+	3582	15.3194	3.127	0.599399	5.21689	1.81955e-07	1.02349e-06	up
PTPRH	chr19	55181247	55209501	protein_coding	protein tyrosine phosphatase receptor type H	-	28255	14.3292	3.66303	0.702866	5.21157	1.87247e-07	1.05173e-06	up
OTOG	chr11	17547259	17646044	protein_coding	otogelin	+	98786	47.0351	1.37346	0.26373	5.20784	1.91056e-07	1.07186e-06	up
CHRNB4	chr15	78624111	78661641	protein_coding	cholinergic receptor nicotinic beta 4 subunit	-	37531	27.6708	1.98541	0.381798	5.20017	1.99108e-07	1.11574e-06	up
TMEM221	chr19	17435509	17448668	protein_coding	transmembrane protein 221	-	13160	29.829	1.80555	0.347277	5.19915	2.00201e-07	1.12153e-06	up
BCAS1	chr20	53943541	54070594	protein_coding	brain enriched myelin associated protein 1	-	127054	22.3223	2.1887	0.421461	5.19312	2.06802e-07	1.15615e-06	up
EPSTI1	chr13	42886388	42992241	protein_coding	epithelial stromal interaction 1	-	105854	58.1935	1.22163	0.235299	5.19184	2.08223e-07	1.16342e-06	up
GRID2	chr4	92303966	93810456	protein_coding	glutamate ionotropic receptor delta type subunit 2	+	1506491	41.1208	1.579	0.30479	5.18061	2.21159e-07	1.23247e-06	up
OSGIN1	chr16	83953240	83966332	protein_coding	oxidative stress induced growth inhibitor 1	+	13093	23.9645	2.09525	0.40456	5.17908	2.22984e-07	1.24192e-06	up
CFAP77	chr9	132410211	132573319	protein_coding	cilia and flagella associated protein 77	+	163109	34.5738	1.64418	0.317564	5.17746	2.24924e-07	1.25164e-06	up
HSD11B2	chr16	67429801	67437553	protein_coding	hydroxysteroid 11-beta dehydrogenase 2	+	7753	53.761	1.27576	0.246409	5.17739	2.25011e-07	1.25176e-06	up
HAGHL	chr16	727106	729715	protein_coding	hydroxyacylglutathione hydrolase like	+	2610	77.5939	1.12048	0.216502	5.1754	2.27424e-07	1.26445e-06	up
LRRN3	chr7	111091127	111125454	protein_coding	leucine rich repeat neuronal 3	+	34328	13.8428	3.60957	0.697602	5.17426	2.28821e-07	1.27148e-06	up
SPTSSB	chr3	161344798	161371517	protein_coding	serine palmitoyltransferase small subunit B	-	26720	15.9738	2.87163	0.556042	5.16441	2.41204e-07	1.33759e-06	up
LOC124904632	chr19	8379599	8388159	lncRNA	uncharacterized LOC124904632	+	8561	51.6559	1.30914	0.253665	5.16092	2.45739e-07	1.36234e-06	up
SLC22A31	chr16	89195761	89201678	protein_coding	solute carrier family 22 member 31	-	5918	50.8772	1.37886	0.267431	5.15595	2.52352e-07	1.39618e-06	up
DUSP26	chr8	33591330	33600023	protein_coding	dual specificity phosphatase 26	-	8694	18.7474	2.51076	0.487152	5.15395	2.55049e-07	1.40989e-06	up
LOC105378626	chr1	31565559	31579543	lncRNA	uncharacterized LOC105378626	-	13985	18.9143	2.42434	0.470607	5.15152	2.58389e-07	1.42671e-06	up
PDCD6IP-DT	chr3	33793644	33798519	lncRNA	PDCD6IP divergent transcript	-	4876	78.8574	-1.05818	0.205509	-5.14906	2.61798e-07	1.44429e-06	down
FGF23	chr12	4368227	4379712	protein_coding	fibroblast growth factor 23	-	11486	13.8414	3.89023	0.756382	5.1432	2.70095e-07	1.48921e-06	up
ACTA2	chr10	88935074	88991337	protein_coding	actin alpha 2, smooth muscle	-	56264	75.277	1.09949	0.213801	5.14259	2.70984e-07	1.49282e-06	up
NMUR1	chr2	231518455	231530445	protein_coding	neuromedin U receptor 1	-	11991	27.5534	1.86489	0.363135	5.13554	2.81337e-07	1.54675e-06	up
ADAMTS14	chr10	70672506	70762441	protein_coding	ADAM metallopeptidase with thrombospondin type 1 motif 14	+	89936	13.6761	3.59191	0.700091	5.13064	2.88756e-07	1.58527e-06	up
GRM3	chr7	86643909	86864879	protein_coding	glutamate metabotropic receptor 3	+	220971	13.85	3.60962	0.704393	5.12444	2.98424e-07	1.63554e-06	up
PAX7	chr1	18630846	18748866	protein_coding	paired box 7	+	118021	34.7174	1.69064	0.330167	5.12056	3.04635e-07	1.66768e-06	up
HLA-DMA	chr6	32948618	32953097	protein_coding	major histocompatibility complex, class II, DM alpha	-	4480	34.2867	1.6265	0.318112	5.11298	3.1711e-07	1.73203e-06	up
MDH1B	chr2	206737763	206765328	protein_coding	malate dehydrogenase 1B	-	27566	36.8959	1.61433	0.316303	5.10376	3.32979e-07	1.81355e-06	up
RASGRP3	chr2	33436348	33564731	protein_coding	RAS guanyl releasing protein 3	+	128384	18.752	2.41015	0.473088	5.09452	3.49635e-07	1.89888e-06	up
ABCA1	chr9	104781006	104928155	protein_coding	ATP binding cassette subfamily A member 1	-	147150	51.5019	1.27957	0.251285	5.0921	3.5411e-07	1.91993e-06	up
SEMA5B	chr3	122909082	123028605	protein_coding	semaphorin 5B	-	119524	23.1412	2.10363	0.413584	5.08636	3.65007e-07	1.97734e-06	up
SH3RF2	chr5	145936578	146081773	protein_coding	SH3 domain containing ring finger 2	+	145196	32.9452	1.71463	0.337636	5.07836	3.80713e-07	2.05778e-06	up
CBLN1	chr16	49277917	49281838	protein_coding	cerebellin 1 precursor	-	3922	39.6808	1.57654	0.311013	5.06905	3.99807e-07	2.15674e-06	up
C11orf96	chr11	43942637	43943878	protein_coding	chromosome 11 open reading frame 96	+	1242	34.9451	1.58456	0.312722	5.06701	4.04112e-07	2.17751e-06	up
IGSF21	chr1	18107798	18378483	protein_coding	immunoglobin superfamily member 21	+	270686	13.3712	3.55364	0.703281	5.05295	4.35038e-07	2.33499e-06	up
BCAN	chr1	156642117	156659528	protein_coding	brevican	+	17412	13.6209	4.64324	0.919793	5.04813	4.46151e-07	2.38996e-06	up
LOC105369435	chr11	94197409	94282221	lncRNA	uncharacterized LOC105369435	+	84813	19.7306	2.30726	0.457362	5.0447	4.54231e-07	2.43189e-06	up
ERBB4	chr2	211375717	212538802	protein_coding	erb-b2 receptor tyrosine kinase 4	-	1163086	80.7279	1.00092	0.198576	5.04047	4.6439e-07	2.48213e-06	up
WNT9A	chr1	227918656	227947932	protein_coding	Wnt family member 9A	-	29277	75.2429	1.0556	0.209532	5.03789	4.70687e-07	2.51509e-06	up
CFAP300	chr11	102047437	102084554	protein_coding	cilia and flagella associated protein 300	+	37118	44.5538	1.40421	0.279105	5.03111	4.87646e-07	2.60209e-06	up
EVA1A	chr2	75492318	75569719	protein_coding	eva-1 homolog A, regulator of programmed cell death	-	77402	39.4983	1.50463	0.301106	4.99701	5.82261e-07	3.07367e-06	up
PTGIS	chr20	49503874	49568137	protein_coding	prostaglandin I2 synthase	-	64264	36.7199	1.53402	0.307652	4.98621	6.15749e-07	3.24243e-06	up
MIR9-1HG	chr1	156404252	156429548	lncRNA	MIR9-1 host gene	-	25297	33.1376	1.68452	0.337989	4.98396	6.22951e-07	3.27766e-06	up
LRFN2	chr6	40391591	40587364	protein_coding	leucine rich repeat and fibronectin type III domain containing 2	-	195774	13.587	6.15879	1.23587	4.98335	6.24922e-07	3.28623e-06	up
HS3ST6	chr16	1911475	1920940	protein_coding	heparan sulfate-glucosamine 3-sulfotransferase 6	-	9466	13.8596	3.15637	0.633718	4.98071	6.33504e-07	3.32601e-06	up
LRRK1	chr15	100919357	101078257	protein_coding	leucine rich repeat kinase 1	+	158901	75.9621	1.04433	0.209674	4.98072	6.33494e-07	3.32601e-06	up
SLC30A10	chr1	219910445	219959098	protein_coding	solute carrier family 30 member 10	-	48654	72.5239	1.03805	0.208585	4.97664	6.46987e-07	3.39205e-06	up
DSG3	chr18	31447741	31478702	protein_coding	desmoglein 3	+	30962	7.8875	6.35489	1.27704	4.97626	6.48259e-07	3.39779e-06	up
KANK3	chr19	8322584	8343262	protein_coding	KN motif and ankyrin repeat domains 3	-	20679	51.9783	1.25316	0.251846	4.97591	6.49411e-07	3.4029e-06	up
CCNA1	chr13	36431517	36442870	protein_coding	cyclin A1	+	11354	15.1781	2.78735	0.560275	4.97498	6.52558e-07	3.41846e-06	up
NTNG1	chr1	107140088	107484923	protein_coding	netrin G1	+	344836	21.8785	2.07698	0.417563	4.97405	6.55685e-07	3.43203e-06	up
NPPC	chr2	231921809	231926396	protein_coding	natriuretic peptide C	-	4588	72.6458	1.08889	0.218941	4.97346	6.57686e-07	3.44157e-06	up
LXN	chr3	158666414	158672648	protein_coding	latexin	-	6235	66.3127	-1.15696	0.232633	-4.97334	6.58084e-07	3.44271e-06	down
NOD2	chr16	50693606	50733075	protein_coding	nucleotide binding oligomerization domain containing 2	+	39470	29.8599	1.75909	0.353848	4.97133	6.64964e-07	3.47587e-06	up
PROKR1	chr2	68643579	68658251	protein_coding	prokineticin receptor 1	+	14673	12.8391	4.55466	0.916387	4.97024	6.68695e-07	3.49442e-06	up
SLCO5A1-AS1	chr8	69834110	69850497	lncRNA	SLCO5A1 antisense RNA 1	+	16388	26.2852	1.83156	0.368639	4.96844	6.74935e-07	3.52415e-06	up
SLC4A10	chr2	161624416	161985270	protein_coding	solute carrier family 4 member 10	+	360855	13.2123	3.29546	0.664122	4.96213	6.97226e-07	3.62969e-06	up
MSTN	chr2	190055700	190062729	protein_coding	myostatin	-	7030	13.2234	3.2957	0.664335	4.9609	7.01671e-07	3.65086e-06	up
AKR1C1	chr10	4963415	4983283	protein_coding	aldo-keto reductase family 1 member C1	+	19869	14.3571	3.02513	0.610438	4.95567	7.20818e-07	3.74136e-06	up
LINC01232	chr13	99486962	99499306	lncRNA	long intergenic non-protein coding RNA 1232	-	12345	38.076	1.46423	0.295703	4.95169	7.35711e-07	3.81454e-06	up
ACOXL	chr2	110732573	111118548	protein_coding	acyl-CoA oxidase like	+	385976	38.7399	1.46343	0.295706	4.94892	7.46249e-07	3.86709e-06	up
LOC643201	chr5	176143085	176199295	transcribed_pseudogene	centrosomal protein 192kDa pseudogene	-	56211	17.1441	2.47108	0.500421	4.93799	7.89303e-07	4.0781e-06	up
HVCN1	chr12	110648686	110704952	protein_coding	hydrogen voltage gated channel 1	-	56267	35.2839	1.52819	0.310778	4.91732	8.77373e-07	4.50166e-06	up
PCDH15	chr10	53802771	55627942	protein_coding	protocadherin related 15	-	1825172	13.5444	3.12082	0.635198	4.91315	8.96259e-07	4.59121e-06	up
DNAH2	chr17	7717744	7833742	protein_coding	dynein axonemal heavy chain 2	+	115999	17.6293	2.40789	0.490263	4.91142	9.04183e-07	4.63057e-06	up
VIPR2	chr7	159028175	159144867	protein_coding	vasoactive intestinal peptide receptor 2	-	116693	13.0635	3.27479	0.667845	4.90352	9.41362e-07	4.80432e-06	up
SELL	chr1	169690667	169711620	protein_coding	selectin L	-	20954	24.4826	2.0654	0.421725	4.89749	9.70662e-07	4.94467e-06	up
MYBPC1	chr12	101594971	101695841	protein_coding	myosin binding protein C1	+	100871	13.3917	3.10161	0.634216	4.89046	1.006e-06	5.10977e-06	up
SV2C	chr5	75847464	76353939	protein_coding	synaptic vesicle glycoprotein 2C	+	506476	7.41605	6.26587	1.28258	4.88536	1.03239e-06	5.23968e-06	up
TBXAS1	chr7	139778242	140020293	protein_coding	thromboxane A synthase 1	+	242052	74.6994	1.00766	0.206485	4.88006	1.06052e-06	5.37251e-06	up
SNX32	chr11	65833963	65853701	protein_coding	sorting nexin 32	+	19739	13.8657	3.15533	0.647139	4.87582	1.0836e-06	5.48074e-06	up
HLA-DQA1	chr6	32637406	32655272	protein_coding	major histocompatibility complex, class II, DQ alpha 1	+	17867	13.7316	2.95126	0.605418	4.87475	1.08949e-06	5.50762e-06	up
LYPD6B	chr2	149038699	149215262	protein_coding	LY6/PLAUR domain containing 6B	+	176564	65.8231	1.06333	0.218257	4.87189	1.10534e-06	5.57751e-06	up
SORCS1	chr10	106573663	107181138	protein_coding	sortilin related VPS10 domain containing receptor 1	-	607476	29.233	1.71926	0.352891	4.87193	1.10516e-06	5.57751e-06	up
IQSEC3	chr12	66767	178455	protein_coding	IQ motif and Sec7 domain ArfGEF 3	+	111689	21.193	2.17471	0.44667	4.86873	1.12319e-06	5.66163e-06	up
TMEM178A	chr2	39665483	39735960	protein_coding	transmembrane protein 178A	+	70478	18.2868	2.36719	0.486632	4.86443	1.14787e-06	5.77996e-06	up
TAFA4	chr3	68731766	68932547	protein_coding	TAFA chemokine like family member 4	-	200782	15.6749	2.69801	0.555094	4.86046	1.17111e-06	5.88926e-06	up
CFAP221	chr2	119544449	119660323	protein_coding	cilia and flagella associated protein 221	+	115875	38.5756	1.45584	0.299546	4.86017	1.17282e-06	5.89632e-06	up
TNFRSF1B	chr1	12166991	12209220	protein_coding	TNF receptor superfamily member 1B	+	42230	24.7988	1.90287	0.392006	4.85418	1.20885e-06	6.0634e-06	up
SAP30-DT	chr4	173349231	173370698	lncRNA	SAP30 divergent transcript	-	21468	71.5905	1.03998	0.21437	4.85133	1.22638e-06	6.14792e-06	up
FGD3	chr9	92947523	93036233	protein_coding	FYVE, RhoGEF and PH domain containing 3	+	88711	46.7469	1.33261	0.27477	4.84992	1.23512e-06	6.18688e-06	up
RAC2	chr22	37225270	37244269	protein_coding	Rac family small GTPase 2	-	19000	16.5106	2.52342	0.520753	4.84571	1.2616e-06	6.31128e-06	up
ACVRL1	chr12	51906944	51923361	protein_coding	activin A receptor like type 1	+	16418	33.5143	1.54361	0.319021	4.83857	1.30774e-06	6.51837e-06	up
KLK4	chr19	50906351	50911395	protein_coding	kallikrein related peptidase 4	-	5045	7.25672	6.23461	1.28999	4.83308	1.34437e-06	6.68704e-06	up
TRMT9B	chr8	12945673	13029777	protein_coding	tRNA methyltransferase 9B (putative)	+	84105	48.737	1.26486	0.26189	4.82974	1.36708e-06	6.79122e-06	up
JAK3	chr19	17824782	17847982	protein_coding	Janus kinase 3	-	23201	42.2068	1.35161	0.279901	4.8289	1.37291e-06	6.81491e-06	up
LOC105370119	chr13	25034502	25047538	lncRNA	uncharacterized LOC105370119	-	13037	35.8021	1.48349	0.30721	4.82893	1.3727e-06	6.81491e-06	up
NCKAP1L	chr12	54497752	54548243	protein_coding	NCK associated protein 1 like	+	50492	19.5921	2.20646	0.457754	4.82019	1.43425e-06	7.0919e-06	up
DSCAML1	chr11	117427772	117817514	protein_coding	DS cell adhesion molecule like 1	-	389743	12.7437	3.23714	0.673005	4.80998	1.50948e-06	7.44666e-06	up
COL15A1	chr9	98943907	99070787	protein_coding	collagen type XV alpha 1 chain	+	126881	15.0479	2.76991	0.575943	4.80935	1.51425e-06	7.46632e-06	up
NKX2-2	chr20	21511017	21522689	protein_coding	NK2 homeobox 2	-	11673	60.1589	1.15148	0.239539	4.80707	1.53158e-06	7.54792e-06	up
WNT9B	chr17	46833189	46886738	protein_coding	Wnt family member 9B	+	53550	13.2283	3.08133	0.641126	4.80612	1.53887e-06	7.57802e-06	up
MYEOV	chr11	69294155	69297287	protein_coding	myeloma overexpressed	+	3133	16.6554	2.53717	0.528383	4.80177	1.57272e-06	7.72295e-06	up
RBMS3	chr3	29281071	30010395	protein_coding	RNA binding motif single stranded interacting protein 3	+	729325	35.1307	1.48359	0.309037	4.80069	1.58123e-06	7.76075e-06	up
NIPAL4	chr5	157460213	157474722	protein_coding	NIPA like domain containing 4	+	14510	15.032	2.62679	0.54798	4.79358	1.63831e-06	8.02449e-06	up
CCDC85A	chr2	56183852	56386174	protein_coding	coiled-coil domain containing 85A	+	202323	17.7931	2.32123	0.484318	4.79279	1.64475e-06	8.05194e-06	up
CRIP3	chr6	43305472	43308826	protein_coding	cysteine rich protein 3	-	3355	48.4366	1.22691	0.256253	4.78788	1.68549e-06	8.23458e-06	up
ABCD2	chr12	39531025	39619803	protein_coding	ATP binding cassette subfamily D member 2	-	88779	28.8919	1.69725	0.355101	4.77962	1.75626e-06	8.5596e-06	up
DUSP15	chr20	31845593	31870664	protein_coding	dual specificity phosphatase 15	-	25072	71.8803	1.01845	0.213551	4.76913	1.85019e-06	9.00264e-06	up
CABP1-DT	chr12	120629611	120640522	lncRNA	CABP1 divergent transcript	-	10912	47.4036	1.30981	0.274829	4.7659	1.88013e-06	9.13445e-06	up
DNAH7	chr2	195737703	196068837	protein_coding	dynein axonemal heavy chain 7	-	331135	27.9049	1.73317	0.363672	4.76576	1.88142e-06	9.13838e-06	up
SP6	chr17	47844908	47876311	protein_coding	Sp6 transcription factor	-	31404	60.7504	1.11175	0.233642	4.75837	1.95161e-06	9.46733e-06	up
SEPT5-GP1BB	chr22	19717220	19724774	lncRNA	SEPT5-GP1BB readthrough	+	7555	21.7176	1.99132	0.418903	4.75366	1.99768e-06	9.66889e-06	up
TMEM132B	chr12	125186386	125662377	protein_coding	transmembrane protein 132B	+	475992	14.8835	2.6074	0.5509	4.73298	2.21247e-06	1.06548e-05	up
NPAS3	chr14	32934785	33804173	protein_coding	neuronal PAS domain protein 3	+	869389	16.842	2.32903	0.493141	4.72285	2.32559e-06	1.11688e-05	up
DHX58	chr17	42101411	42112714	protein_coding	DExH-box helicase 58	-	11304	13.8847	2.79866	0.592845	4.72073	2.34995e-06	1.12771e-05	up
TTN	chr2	178525989	178807423	protein_coding	titin	-	281435	15.0238	2.62701	0.55708	4.71568	2.40908e-06	1.15351e-05	up
ATP12A	chr13	24680408	24712472	protein_coding	ATPase H+/K+ transporting non-gastric alpha2 subunit	+	32065	33.3261	1.613	0.342146	4.71438	2.42453e-06	1.16062e-05	up
C7orf57	chr7	48035543	48061297	protein_coding	chromosome 7 open reading frame 57	+	25755	18.8007	2.13137	0.452417	4.71107	2.46416e-06	1.17813e-05	up
JAKMIP2	chr5	147585438	147782728	protein_coding	janus kinase and microtubule interacting protein 2	-	197291	73.5326	1.00665	0.214161	4.70045	2.5959e-06	1.23803e-05	up
GPR146	chr7	1044546	1059261	protein_coding	G protein-coupled receptor 146	+	14716	39.34	-1.357	0.290394	-4.67295	2.96897e-06	1.40514e-05	down
MT1F	chr16	56657959	56659303	protein_coding	metallothionein 1F	+	1345	46.831	1.23193	0.263694	4.67183	2.98528e-06	1.41217e-05	up
CRYBG2	chr1	26321865	26354130	protein_coding	crystallin beta-gamma domain containing 2	-	32266	40.575	1.33363	0.285493	4.67133	2.99251e-06	1.41489e-05	up
CPNE4	chr3	131533569	132039606	protein_coding	copine 4	-	506038	10.9032	5.8368	1.24953	4.67118	2.9947e-06	1.41558e-05	up
KIF19	chr17	74326226	74355820	protein_coding	kinesin family member 19	+	29595	11.2849	3.5755	0.76616	4.66678	3.05953e-06	1.44445e-05	up
TBXA2R	chr19	3594507	3606875	protein_coding	thromboxane A2 receptor	-	12369	37.9255	1.42246	0.304998	4.66383	3.10378e-06	1.46353e-05	up
TMC3-AS1	chr15	81324333	81443076	lncRNA	TMC3 antisense RNA 1	+	118744	78.3646	1.02531	0.219899	4.66265	3.1216e-06	1.47085e-05	up
AARD	chr8	116938207	116944487	protein_coding	alanine and arginine rich domain containing protein	+	6281	43.1798	1.31106	0.281223	4.66198	3.1318e-06	1.47494e-05	up
GDNF	chr5	37812677	37840041	protein_coding	glial cell derived neurotrophic factor	-	27365	34.5351	1.44809	0.311889	4.64296	3.43459e-06	1.61083e-05	up
RCN3	chr19	49528003	49543633	protein_coding	reticulocalbin 3	+	15631	61.4487	1.04203	0.224457	4.64244	3.44317e-06	1.61407e-05	up
SYTL3	chr6	158644936	158764871	protein_coding	synaptotagmin like 3	+	119936	46.0097	1.24823	0.269391	4.63353	3.5948e-06	1.67819e-05	up
HGF	chr7	81699010	81770047	protein_coding	hepatocyte growth factor	-	71038	11.4689	3.31399	0.715261	4.63326	3.59955e-06	1.67999e-05	up
SFRP4	chr7	37905932	37916817	protein_coding	secreted frizzled related protein 4	-	10886	17.1823	2.36116	0.509999	4.62972	3.66154e-06	1.70644e-05	up
IL17REL	chr22	49991811	50012765	protein_coding	interleukin 17 receptor E like	-	20955	23.5549	1.80583	0.39064	4.62274	3.78704e-06	1.76023e-05	up
SYT16	chr14	61812162	62112825	protein_coding	synaptotagmin 16	+	300664	66.2861	1.04463	0.226135	4.61949	3.84689e-06	1.78762e-05	up
TRAV8-2	chr14	21846762	21847221	V_segment	T cell receptor alpha variable 8-2	+	460	13.9105	2.64224	0.572486	4.61539	3.92358e-06	1.82149e-05	up
KCNV1	chr8	109963636	109975771	protein_coding	potassium voltage-gated channel modifier subfamily V member 1	-	12136	17.1798	2.25893	0.489496	4.61481	3.93458e-06	1.82616e-05	up
WNT6	chr2	218859805	218874233	protein_coding	Wnt family member 6	+	14429	11.9437	3.13427	0.679387	4.61339	3.96158e-06	1.83825e-05	up
CFH	chr1	196652043	196747504	protein_coding	complement factor H	+	95462	12.1054	3.15309	0.683694	4.61184	3.99126e-06	1.85112e-05	up
STC1	chr8	23841929	23854806	protein_coding	stanniocalcin 1	-	12878	10.7908	4.29204	0.931001	4.61013	4.02409e-06	1.86545e-05	up
ADGRE2	chr19	14724171	14778560	protein_coding	adhesion G protein-coupled receptor E2	-	54390	10.7916	4.29091	0.931687	4.60552	4.11431e-06	1.90543e-05	up
FOLH1	chr11	49145092	49208602	protein_coding	folate hydrolase 1	-	63511	19.1365	2.07815	0.451874	4.59895	4.24618e-06	1.95989e-05	up
C2orf81	chr2	74414177	74421619	protein_coding	chromosome 2 open reading frame 81	-	7443	57.6446	1.11919	0.24342	4.59777	4.27038e-06	1.96917e-05	up
SLC44A3-AS1	chr1	94616352	94820232	lncRNA	SLC44A3 antisense RNA 1	-	203881	49.7937	1.16326	0.253047	4.59702	4.28578e-06	1.97485e-05	up
ZNF385C	chr17	42025576	42098473	protein_coding	zinc finger protein 385C	-	72898	41.7077	1.29983	0.283076	4.59179	4.39466e-06	2.02163e-05	up
SYT5	chr19	55171196	55180289	protein_coding	synaptotagmin 5	-	9094	56.5265	1.0977	0.239697	4.57955	4.65986e-06	2.13748e-05	up
DGKI	chr7	137381037	137846974	protein_coding	diacylglycerol kinase iota	-	465938	10.6485	3.83163	0.836873	4.57851	4.683e-06	2.14759e-05	up
APOD	chr3	195568705	195583940	protein_coding	apolipoprotein D	-	15236	10.9507	3.87496	0.8469	4.57547	4.75154e-06	2.17746e-05	up
INPP4B	chr4	142023160	142846535	protein_coding	inositol polyphosphate-4-phosphatase type II B	-	823376	53.4209	1.12747	0.246716	4.56989	4.87972e-06	2.2346e-05	up
LOC112267908	chr3	125756192	125848329	protein_coding	translation initiation factor IF-2-like	+	92138	28.9553	1.55932	0.341265	4.56924	4.895e-06	2.24107e-05	up
PDE1C	chr7	31616777	32428224	protein_coding	phosphodiesterase 1C	-	811448	10.6339	4.26854	0.934526	4.5676	4.93352e-06	2.25816e-05	up
PDGFB	chr22	39223359	39244982	protein_coding	platelet derived growth factor subunit B	-	21624	10.6284	4.26762	0.936179	4.55855	5.15084e-06	2.35259e-05	up
TRAF1	chr9	120902393	120929171	protein_coding	TNF receptor associated factor 1	-	26779	70.7756	1.0025	0.220043	4.55594	5.21519e-06	2.38085e-05	up
LOC105378849	chr1	90219425	90285230	lncRNA	uncharacterized LOC105378849	+	65806	29.784	1.5235	0.334435	4.55543	5.22773e-06	2.38601e-05	up
REM1	chr20	31475288	31484895	protein_coding	RRAD and GEM like GTPase 1	+	9608	11.5605	5.00341	1.09878	4.5536	5.27364e-06	2.40467e-05	up
TPTE2P1	chr13	24928755	24968484	transcribed_pseudogene	TPTE2 pseudogene 1	-	39730	42.2582	1.26706	0.279162	4.53879	5.65783e-06	2.56767e-05	up
SLC25A21	chr14	36677921	37172606	protein_coding	solute carrier family 25 member 21	-	494686	62.6613	-1.05269	0.232244	-4.53267	5.8242e-06	2.63695e-05	down
GFAP	chr17	44903159	44915500	protein_coding	glial fibrillary acidic protein	-	12342	27.0148	1.61748	0.357012	4.53059	5.88189e-06	2.66181e-05	up
PTHLH	chr12	27958084	27972733	protein_coding	parathyroid hormone like hormone	-	14650	32.0752	1.45922	0.32225	4.52823	5.94792e-06	2.69043e-05	up
CYP3A5	chr7	99648194	99679996	protein_coding	cytochrome P450 family 3 subfamily A member 5	-	31803	16.2096	2.26453	0.500809	4.52175	6.1329e-06	2.76564e-05	up
RNASE4	chr14	20684560	20701216	protein_coding	ribonuclease A family member 4	+	16657	49.2959	1.18969	0.263262	4.51901	6.21284e-06	2.7984e-05	up
LOC105370960	chr15	88796149	88803518	lncRNA	uncharacterized LOC105370960	-	7370	12.6279	2.81392	0.623178	4.51543	6.31883e-06	2.84214e-05	up
GALNT14	chr2	30886782	31138440	protein_coding	polypeptide N-acetylgalactosaminyltransferase 14	-	251659	26.8504	1.65518	0.36736	4.50561	6.61829e-06	2.9685e-05	up
FOXL1	chr16	86578549	86583478	protein_coding	forkhead box L1	+	4930	27.346	1.63953	0.364259	4.501	6.76344e-06	3.03007e-05	up
TPBGL	chr11	75240774	75243704	protein_coding	trophoblast glycoprotein like	+	2931	11.1333	3.26849	0.726292	4.50024	6.78773e-06	3.04024e-05	up
LIX1L-AS1	chr1	145926831	145941203	lncRNA	LIX1L antisense RNA 1	+	14373	42.3175	-1.28739	0.286291	-4.4968	6.89833e-06	3.08612e-05	down
SLC7A10	chr19	33208664	33225850	protein_coding	solute carrier family 7 member 10	-	17187	16.1671	2.37379	0.52789	4.49676	6.89981e-06	3.08612e-05	up
INHBA	chr7	41685114	41705406	protein_coding	inhibin subunit beta A	-	20293	14.2582	2.53456	0.563885	4.49481	6.96313e-06	3.113e-05	up
BMP3	chr4	81030708	81057627	protein_coding	bone morphogenetic protein 3	+	26920	32.7268	1.45909	0.325032	4.48906	7.15378e-06	3.19257e-05	up
PLIN5	chr19	4522531	4535224	protein_coding	perilipin 5	-	12694	26.1323	1.71291	0.381769	4.48678	7.23076e-06	3.22589e-05	up
FAM110C	chr2	38814	46505	protein_coding	family with sequence similarity 110 member C	-	7692	29.0952	1.57116	0.350372	4.48426	7.31672e-06	3.26272e-05	up
CSRP1	chr1	201483530	201507123	protein_coding	cysteine and glycine rich protein 1	-	23594	34.3117	1.47557	0.329348	4.48028	7.45463e-06	3.32037e-05	up
CTCFL	chr20	57495965	57525652	protein_coding	CCCTC-binding factor like	-	29688	10.323	4.22355	0.942978	4.47894	7.50133e-06	3.33807e-05	up
GLIS1	chr1	53506239	53739164	protein_coding	GLIS family zinc finger 1	-	232926	37.6498	1.34121	0.299574	4.47708	7.56722e-06	3.36428e-05	up
GFRA2	chr8	21690398	21812345	protein_coding	GDNF family receptor alpha 2	-	121948	10.8309	3.22252	0.722344	4.4612	8.15008e-06	3.60423e-05	up
SHD	chr19	4279069	4290722	protein_coding	Src homology 2 domain containing transforming protein D	+	11654	20.614	1.8977	0.425655	4.45831	8.26075e-06	3.64981e-05	up
NTRK3	chr15	87859751	88256739	protein_coding	neurotrophic receptor tyrosine kinase 3	-	396989	10.9282	4.91964	1.10384	4.45686	8.31695e-06	3.67295e-05	up
ACTRT3	chr3	169766921	169769561	protein_coding	actin related protein T3	-	2641	59.4078	-1.02526	0.230061	-4.45645	8.33269e-06	3.67898e-05	down
TLX3	chr5	171309248	171312139	protein_coding	T cell leukemia homeobox 3	+	2892	22.5683	1.78963	0.401919	4.45271	8.47918e-06	3.73601e-05	up
KCNC4-DT	chr1	110208450	110209987	lncRNA	KCNC4 divergent transcript	-	1538	41.116	1.26973	0.285292	4.45064	8.56155e-06	3.76798e-05	up
FSTL5	chr4	161383897	162164000	protein_coding	follistatin like 5	-	780104	10.2941	4.22186	0.948826	4.44956	8.60472e-06	3.78438e-05	up
LOC124904345	chr18	31041533	31045226	lncRNA	uncharacterized LOC124904345	+	3694	36.8061	1.39571	0.313719	4.44892	8.63024e-06	3.79387e-05	up
CD8A	chr2	86784605	86808396	protein_coding	CD8 subunit alpha	-	23792	52.5618	1.18178	0.265848	4.44531	8.77663e-06	3.85646e-05	up
WNT2	chr7	117275451	117323058	protein_coding	Wnt family member 2	-	47608	9.99394	4.17618	0.939641	4.44444	8.81228e-06	3.87124e-05	up
AMPD3	chr11	10450388	10507579	protein_coding	adenosine monophosphate deaminase 3	+	57192	34.2073	1.39282	0.313823	4.43824	9.06961e-06	3.97429e-05	up
EGR2	chr10	62811996	62819167	protein_coding	early growth response 2	-	7172	12.9615	2.68287	0.604871	4.43544	9.18856e-06	4.02066e-05	up
ST8SIA1	chr12	22193391	22334707	protein_coding	ST8 alpha-N-acetyl-neuraminide alpha-2,8-sialyltransferase 1	-	141317	10.008	3.73604	0.842324	4.4354	9.19007e-06	4.02066e-05	up
C1QTNF2	chr5	160347754	160370626	protein_coding	C1q and TNF related 2	-	22873	13.9322	2.49749	0.563237	4.43416	9.24305e-06	4.04199e-05	up
SLC4A5	chr2	74216242	74343416	protein_coding	solute carrier family 4 member 5	-	127175	40.9231	1.29007	0.291272	4.42908	9.46342e-06	4.13084e-05	up
SCTR-AS1	chr2	119476454	119487346	lncRNA	SCTR antisense RNA 1	+	10893	5.53028	5.84199	1.32115	4.42189	9.78395e-06	4.26108e-05	up
CCDC141	chr2	178814978	179050137	protein_coding	coiled-coil domain containing 141	-	235160	10.613	4.87688	1.10301	4.42144	9.80463e-06	4.26718e-05	up
MAL2	chr8	119208363	119245673	protein_coding	mal, T cell differentiation protein 2	+	37311	21.1003	1.86801	0.422818	4.418	9.96172e-06	4.3326e-05	up
APOBEC3B	chr22	38982347	38992779	protein_coding	apolipoprotein B mRNA editing enzyme catalytic subunit 3B	+	10433	53.0962	1.0939	0.248087	4.40935	1.03682e-05	4.50225e-05	up
SLC45A1	chr1	8318114	8344165	protein_coding	solute carrier family 45 member 1	+	26052	9.85399	3.71143	0.842184	4.40692	1.04853e-05	4.55002e-05	up
FAM13C	chr10	59246129	59363181	protein_coding	family with sequence similarity 13 member C	-	117053	60.9264	1.02555	0.232895	4.40348	1.06527e-05	4.61746e-05	up
MOB3C	chr1	46607719	46616811	protein_coding	MOB kinase activator 3C	-	9093	58.1756	1.05902	0.240684	4.40002	1.08243e-05	4.68865e-05	up
KMT2CP1	chr1	144663837	144689892	transcribed_pseudogene	lysine methyltransferase 2C pseudogene 1	+	26056	10.1932	3.41436	0.776961	4.39451	1.11024e-05	4.8037e-05	up
PRR15	chr7	29563835	29567295	protein_coding	proline rich 15	+	3461	33.058	1.40144	0.319392	4.38783	1.14489e-05	4.94583e-05	up
LOC105377616	chr4	189703880	189723158	lncRNA	uncharacterized LOC105377616	-	19279	17.0558	2.04918	0.468106	4.3776	1.19994e-05	5.16737e-05	up
PPP1R1C	chr2	181954480	182131385	protein_coding	protein phosphatase 1 regulatory inhibitor subunit 1C	+	176906	11.6687	2.87466	0.656835	4.37653	1.20581e-05	5.18919e-05	up
FAM20A	chr17	68535116	68601367	protein_coding	FAM20A golgi associated secretory pathway pseudokinase	-	66252	9.84719	4.15379	0.9496	4.37425	1.21848e-05	5.24018e-05	up
RNF175	chr4	153710160	153760024	protein_coding	ring finger protein 175	-	49865	20.6515	1.82527	0.417984	4.36684	1.26055e-05	5.4114e-05	up
UBBP4	chr17	22090750	22205151	transcribed_pseudogene	ubiquitin B pseudogene 4	+	114402	37.3678	1.29267	0.296049	4.3664	1.2631e-05	5.42113e-05	up
NDST4	chr4	114827763	115113620	protein_coding	N-deacetylase and N-sulfotransferase 4	-	285858	23.5915	1.68786	0.387448	4.35634	1.32254e-05	5.6598e-05	up
ATP8B1	chr18	57646426	57803315	protein_coding	ATPase phospholipid transporting 8B1	-	156890	28.463	1.52891	0.35124	4.35289	1.34354e-05	5.74457e-05	up
B3GALT1	chr2	167293001	167874045	protein_coding	beta-1,3-galactosyltransferase 1	+	581045	25.7265	1.57554	0.362347	4.34816	1.37284e-05	5.86204e-05	up
PRR16	chr5	120464278	120794594	protein_coding	proline rich 16	+	330317	39.4663	1.27651	0.293784	4.34508	1.39224e-05	5.93771e-05	up
COL5A3	chr19	9959561	10010504	protein_coding	collagen type V alpha 3 chain	-	50944	10.3633	3.15156	0.726776	4.33636	1.44862e-05	6.16507e-05	up
DNM1P46	chr15	99790780	99806927	transcribed_pseudogene	dynamin 1 pseudogene 46	-	16148	21.3017	1.74705	0.403943	4.325	1.52531e-05	6.46709e-05	up
CRACDL	chr2	98793846	98936225	protein_coding	CRACD like	-	142380	39.9883	1.24279	0.287604	4.32119	1.55191e-05	6.56829e-05	up
MAT1A	chr10	80271820	80289658	protein_coding	methionine adenosyltransferase 1A	-	17839	13.9424	2.3638	0.547786	4.31518	1.59469e-05	6.73896e-05	up
TBX21	chr17	47733236	47746122	protein_coding	T-box transcription factor 21	+	12887	14.9236	2.23336	0.517588	4.31493	1.59653e-05	6.74374e-05	up
DGKB	chr7	14145049	14974858	protein_coding	diacylglycerol kinase beta	-	829810	9.975	4.78364	1.10892	4.31377	1.60497e-05	6.77642e-05	up
LRGUK	chr7	134127340	134276685	protein_coding	leucine rich repeats and guanylate kinase domain containing	+	149346	49.9726	1.10073	0.255247	4.31243	1.61471e-05	6.81454e-05	up
GSG1L	chr16	27787528	28063714	protein_coding	GSG1 like	-	276187	8.5301	5.47675	1.27144	4.30751	1.65104e-05	6.96177e-05	up
CD1D	chr1	158178030	158186427	protein_coding	CD1d molecule	+	8398	31.7968	1.39913	0.325694	4.29585	1.74028e-05	7.31879e-05	up
CREB3L3	chr19	4153631	4173054	protein_coding	cAMP responsive element binding protein 3 like 3	+	19424	8.38238	5.45021	1.26904	4.29475	1.7489e-05	7.3509e-05	up
STMND1	chr6	17102050	17131378	protein_coding	stathmin domain containing 1	+	29329	26.5574	1.53359	0.357895	4.28503	1.82716e-05	7.66069e-05	up
C3orf80	chr3	160225422	160228213	protein_coding	chromosome 3 open reading frame 80	+	2792	58.9601	1.03088	0.240796	4.28112	1.85958e-05	7.79152e-05	up
MCF2L2	chr3	183178041	183428619	protein_coding	MCF.2 cell line derived transforming sequence-like 2	-	250579	38.4791	1.25798	0.29403	4.27839	1.88247e-05	7.87883e-05	up
POU3F1	chr1	38043829	38046793	protein_coding	POU class 3 homeobox 1	-	2965	52.444	1.06799	0.249627	4.27833	1.88297e-05	7.87921e-05	up
TMEM154	chr4	152618628	152679997	protein_coding	transmembrane protein 154	-	61370	19.4973	1.86929	0.437097	4.2766	1.89767e-05	7.93723e-05	up
KCNF1	chr2	10911934	10914225	protein_coding	potassium voltage-gated channel modifier subfamily F member 1	+	2292	12.6573	2.48168	0.581638	4.26671	1.98375e-05	8.27568e-05	up
EXOSC10-AS1	chr1	11099675	11102105	lncRNA	EXOSC10 antisense RNA 1	+	2431	30.7097	-1.38055	0.323628	-4.26585	1.99141e-05	8.3004e-05	down
LOC101927375	chr13	24541000	24571146	protein_coding	ankyrin repeat domain-containing protein 26-like	+	30147	9.70981	3.33962	0.783358	4.26321	2.01512e-05	8.38832e-05	up
SNAP25	chr20	10218830	10307418	protein_coding	synaptosome associated protein 25	+	88589	10.0491	3.1023	0.728555	4.25816	2.06116e-05	8.56698e-05	up
FUT9	chr6	96015974	96215612	protein_coding	fucosyltransferase 9	+	199639	13.9666	2.36199	0.555119	4.25492	2.09125e-05	8.68079e-05	up
KLK1	chr19	50819146	50823787	protein_coding	kallikrein 1	-	4642	10.9991	2.99764	0.704901	4.25256	2.11338e-05	8.77076e-05	up
EGR3	chr8	22687659	22693480	protein_coding	early growth response 3	-	5822	13.3177	2.41756	0.5687	4.25102	2.12795e-05	8.82931e-05	up
SMIM24	chr19	3473986	3480525	protein_coding	small integral membrane protein 24	-	6540	10.5339	2.92973	0.69023	4.24456	2.19022e-05	9.07593e-05	up
CCDC33	chr15	74202999	74336472	protein_coding	coiled-coil domain containing 33	+	133474	9.66799	4.73785	1.11625	4.24444	2.19143e-05	9.07899e-05	up
IKZF2	chr2	212999698	213152456	protein_coding	IKAROS family zinc finger 2	-	152759	44.5838	1.20893	0.284977	4.24221	2.21328e-05	9.16161e-05	up
SLC6A17	chr1	110150494	110202202	protein_coding	solute carrier family 6 member 17	+	51709	50.7846	1.11046	0.262772	4.22596	2.37923e-05	9.81258e-05	up
WDR31	chr9	113313222	113340275	protein_coding	WD repeat domain 31	-	27054	51.4572	1.09244	0.258588	4.22464	2.39319e-05	9.86382e-05	up
TGFB1I1	chr16	31472152	31477960	protein_coding	transforming growth factor beta 1 induced transcript 1	+	5809	58.2263	1.00332	0.237837	4.2185	2.45931e-05	0.000101212	up
GBP1	chr1	89052319	89065208	protein_coding	guanylate binding protein 1	-	12890	10.0459	3.10073	0.735126	4.21796	2.46525e-05	0.000101434	up
MTNR1A	chr4	186533655	186555567	protein_coding	melatonin receptor 1A	-	21913	14.7906	2.21539	0.525893	4.21262	2.52429e-05	0.00010373	up
LOC105373592	chr2	121902453	122432938	lncRNA	uncharacterized LOC105373592	+	530486	29.0059	1.42842	0.33912	4.21215	2.52946e-05	0.000103921	up
CPNE5	chr6	36740775	36839998	protein_coding	copine 5	-	99224	11.3392	2.83064	0.673367	4.20371	2.62576e-05	0.000107578	up
LOC124904646	chr19	16189521	16197738	lncRNA	uncharacterized LOC124904646	-	8218	47.9368	-1.0931	0.260305	-4.19932	2.67718e-05	0.000109544	down
CTXND1	chr15	80195481	80252213	protein_coding	cortexin domain containing 1	-	56733	9.35172	4.68661	1.11613	4.19897	2.68129e-05	0.000109689	up
FZD10-AS1	chr12	130151593	130161678	lncRNA	FZD10 antisense divergent transcript	-	10086	22.3043	1.64088	0.390836	4.19839	2.68824e-05	0.000109903	up
SLC35D3	chr6	136922301	136925660	protein_coding	solute carrier family 35 member D3	+	3360	40.3248	1.20115	0.286216	4.19664	2.70902e-05	0.000110635	up
INKA2-AS1	chr1	111739841	111747798	lncRNA	INKA2 antisense RNA 1	+	7958	34.8857	1.36007	0.325582	4.17735	2.94925e-05	0.000119911	up
SLC32A1	chr20	38724486	38729372	protein_coding	solute carrier family 32 member 1	+	4887	4.74404	5.62044	1.34575	4.17645	2.96091e-05	0.000120296	up
VSTM2B	chr19	29525418	29564551	protein_coding	V-set and transmembrane domain containing 2B	+	39134	7.7574	5.33545	1.27909	4.17128	3.02898e-05	0.000122763	up
LOC124900660	chr4	9659025	9690554	lncRNA	uncharacterized LOC124900660	+	31530	17.3938	1.90503	0.457214	4.16661	3.09163e-05	0.00012517	up
LOC105379082	chr5	92553145	92688226	lncRNA	uncharacterized LOC105379082	-	135082	8.90349	3.99661	0.959938	4.16341	3.13532e-05	0.000126858	up
SCIRT	chr6	43995723	44074652	lncRNA	stem cell inhibitory RNA transcript	-	78930	14.135	2.25645	0.542659	4.15813	3.20868e-05	0.000129472	up
COL6A3	chr2	237324018	237414164	protein_coding	collagen type VI alpha 3 chain	-	90147	20.5068	1.74154	0.419072	4.15571	3.24275e-05	0.000130655	up
UPK1A-AS1	chr19	35667948	35673291	lncRNA	UPK1A antisense RNA 1	-	5344	10.0335	3.10056	0.747338	4.1488	3.34215e-05	0.000134463	up
LYNX1	chr8	142771197	142777872	protein_coding	Ly6/neurotoxin 1	-	6676	29.6798	1.38596	0.334173	4.14744	3.3621e-05	0.00013518	up
SSTR3	chr22	37204237	37220548	protein_coding	somatostatin receptor 3	-	16312	4.57453	5.56896	1.34527	4.13965	3.47841e-05	0.00013942	up
SLC18A3	chr10	49610310	49612720	protein_coding	solute carrier family 18 member A3	+	2411	4.58366	5.57101	1.34596	4.13907	3.48714e-05	0.00013974	up
SLC12A5-AS1	chr20	46013502	46022073	lncRNA	SLC12A5 and MMP9 antisense RNA 1	-	8572	23.5749	1.6287	0.39352	4.13879	3.4914e-05	0.000139882	up
EPHB6	chr7	142855076	142871093	protein_coding	EPH receptor B6	+	16018	14.9588	2.12075	0.512831	4.13538	3.54363e-05	0.000141886	up
CDKN1C	chr11	2883218	2885775	protein_coding	cyclin dependent kinase inhibitor 1C	-	2558	57.1858	1.005	0.24303	4.13528	3.54525e-05	0.000141921	up
LOC124901689	chr7	87108631	87117737	protein_coding	uncharacterized LOC124901689	+	9107	35.4326	1.25173	0.30271	4.13509	3.54814e-05	0.000142007	up
LIX1	chr5	97091867	97142611	protein_coding	limb and CNS expressed 1	-	50745	34.4296	1.26351	0.305584	4.13473	3.55378e-05	0.000142173	up
LOC105374338	chr4	577168	584866	lncRNA	uncharacterized LOC105374338	+	7699	19.8449	1.82618	0.441782	4.13367	3.57018e-05	0.0001428	up
AKR1C2	chr10	4987775	5018000	protein_coding	aldo-keto reductase family 1 member C2	-	30226	12.0179	2.55713	0.619236	4.1295	3.63558e-05	0.000145264	up
CDK15	chr2	201806429	201895550	protein_coding	cyclin dependent kinase 15	+	89122	24.417	1.63798	0.397501	4.1207	3.77728e-05	0.000150644	up
LOC105375101	chr6	57823013	57846272	lncRNA	uncharacterized LOC105375101	+	23260	13.3318	2.28219	0.554182	4.11813	3.81959e-05	0.000152237	up
LOC124901368	chr6	108120120	108138118	lncRNA	uncharacterized LOC124901368	-	17999	14.804	2.10126	0.510592	4.11534	3.86617e-05	0.000153934	up
RSPO3	chr6	127118671	127199481	protein_coding	R-spondin 3	+	80811	8.7455	3.52578	0.857106	4.11359	3.89557e-05	0.00015504	up
LOC124901229	chr6	70956428	70958917	protein_coding	uncharacterized LOC124901229	+	2490	10.7141	2.73799	0.665863	4.11194	3.92343e-05	0.000156084	up
XDH	chr2	31334321	31414742	protein_coding	xanthine dehydrogenase	-	80422	32.8083	1.30829	0.318999	4.10122	4.10972e-05	0.000162922	up
TMPRSS2	chr21	41464305	41508158	protein_coding	transmembrane serine protease 2	-	43854	8.7599	3.52714	0.860059	4.10104	4.11299e-05	0.000163018	up
ITGB8	chr7	20329766	20415754	protein_coding	integrin subunit beta 8	+	85989	22.4163	1.71723	0.418776	4.10059	4.12103e-05	0.000163303	up
CDH4	chr20	61252261	61940617	protein_coding	cadherin 4	+	688357	14.3067	2.15481	0.526221	4.09488	4.22392e-05	0.00016707	up
AKR1C3	chr10	5048781	5107686	protein_coding	aldo-keto reductase family 1 member C3	+	58906	8.75082	3.52602	0.861208	4.09427	4.23504e-05	0.000167441	up
CEACAM21	chr19	41549518	41586844	protein_coding	CEA cell adhesion molecule 21	+	37327	4.72253	5.61558	1.37227	4.09218	4.27336e-05	0.000168887	up
COX6B2	chr19	55349704	55354719	protein_coding	cytochrome c oxidase subunit 6B2	-	5016	19.2021	1.76439	0.43133	4.09058	4.30288e-05	0.000169983	up
HPCA	chr1	32885996	32894646	protein_coding	hippocalcin	+	8651	15.2876	2.05077	0.501379	4.09026	4.30896e-05	0.000170189	up
BICDL2	chr16	3027682	3036944	protein_coding	BICD family like cargo adaptor 2	-	9263	43.6219	1.13899	0.278898	4.0839	4.4287e-05	0.000174774	up
LOC124903288	chr14	23078266	23082214	lncRNA	uncharacterized LOC124903288	+	3949	35.5444	-1.20824	0.295994	-4.08197	4.46559e-05	0.000176121	down
NDST3	chr4	118033322	118258634	protein_coding	N-deacetylase and N-sulfotransferase 3	+	225313	15.9367	2.0226	0.495736	4.08	4.50348e-05	0.00017747	up
TTYH1	chr19	54415464	54436904	protein_coding	tweety family member 1	+	21441	4.42705	5.52073	1.35449	4.07589	4.58394e-05	0.000180382	up
CD44	chr11	35139171	35232402	protein_coding	CD44 molecule (Indian blood group)	+	93232	21.8283	1.60083	0.392917	4.07422	4.61678e-05	0.0001816	up
LOC124909486	chr3	113207397	113215630	protein_coding	uncharacterized LOC124909486	-	8234	38.8431	1.21528	0.298566	4.0704	4.69334e-05	0.000184498	up
RAB6C-AS1	chr2	129966592	129980472	lncRNA	RAB6C antisense RNA 1	-	13881	43.803	1.09447	0.26906	4.06773	4.74724e-05	0.000186464	up
KCNK9	chr8	139600838	139703123	protein_coding	potassium two pore domain channel subfamily K member 9	-	102286	13.0034	2.24165	0.551609	4.06384	4.82716e-05	0.000189294	up
SCN2A	chr2	165239414	165392304	protein_coding	sodium voltage-gated channel alpha subunit 2	+	152891	36.248	1.2313	0.303536	4.05652	4.981e-05	0.000195048	up
VWF	chr12	5948877	6124670	protein_coding	von Willebrand factor	-	175794	8.42648	3.91346	0.96622	4.05028	5.11563e-05	0.000200116	up
MAB21L3	chr1	116111399	116138149	protein_coding	mab-21 like 3	+	26751	9.90183	2.82926	0.699206	4.04639	5.20144e-05	0.000203183	up
RYR1	chr19	38433691	38587564	protein_coding	ryanodine receptor 1	+	153874	14.4487	2.17778	0.538798	4.04192	5.30148e-05	0.000206796	up
RSPO1	chr1	37611350	37634892	protein_coding	R-spondin 1	-	23543	8.25535	3.88288	0.96094	4.04071	5.32896e-05	0.000207742	up
FAM181B	chr11	82729940	82733864	protein_coding	family with sequence similarity 181 member B	-	3925	21.0007	1.65337	0.409302	4.0395	5.35663e-05	0.000208736	up
LINC01918	chr2	105144113	105145424	lncRNA	long intergenic non-protein coding RNA 1918	+	1312	12.1944	2.41555	0.59803	4.03919	5.36369e-05	0.000208926	up
VAT1L	chr16	77788564	77980107	protein_coding	vesicle amine transport 1 like	+	191544	6.96131	5.1763	1.28657	4.02334	5.73774e-05	0.000222369	up
DSEL	chr18	67506587	67516720	protein_coding	dermatan sulfate epimerase like	-	10134	10.8916	2.56689	0.639925	4.01124	6.04018e-05	0.000233056	up
MIR1469	chr15	96333261	96333307	miRNA	microRNA 1469	+	47	21.4126	-1.63897	0.409224	-4.00506	6.20029e-05	0.00023885	down
LOC729870	chr4	152934516	152936837	lncRNA	uncharacterized LOC729870	-	2322	11.0441	2.59269	0.647555	4.00381	6.23309e-05	0.000240018	up
LRRC17	chr7	102913000	102945111	protein_coding	leucine rich repeat containing 17	+	32112	46.7925	1.03091	0.258164	3.99324	6.51764e-05	0.000250223	up
LOC101928255	chr21	42647159	42653658	lncRNA	uncharacterized LOC101928255	-	6500	41.1246	1.15657	0.289765	3.9914	6.56839e-05	0.00025197	up
SCARA5	chr8	27869883	27992673	protein_coding	scavenger receptor class A member 5	-	122791	18.844	1.80793	0.453184	3.98939	6.62425e-05	0.00025391	up
SNAI3	chr16	88677688	88686507	protein_coding	snail family transcriptional repressor 3	-	8820	19.8823	1.68434	0.422566	3.98597	6.72062e-05	0.000257398	up
TDH	chr8	11339637	11368452	transcribed_pseudogene	L-threonine dehydrogenase (pseudogene)	+	28816	27.729	1.3825	0.346867	3.98567	6.72908e-05	0.000257671	up
MIR124-1HG	chr8	9900064	9903329	lncRNA	MIR124-1 host gene	-	3266	8.40388	4.52721	1.13703	3.98161	6.84496e-05	0.000261847	up
HTR1D	chr1	23191895	23217502	protein_coding	5-hydroxytryptamine receptor 1D	-	25608	26.2706	1.41437	0.355445	3.97914	6.91654e-05	0.00026448	up
PRR29	chr17	63998351	64004305	protein_coding	proline rich 29	+	5955	29.0327	1.34299	0.337531	3.97887	6.92431e-05	0.000264672	up
KCNIP2	chr10	101825974	101843800	protein_coding	potassium voltage-gated channel interacting protein 2	-	17827	40.9971	1.12094	0.281825	3.97746	6.96567e-05	0.00026607	up
NCMAP	chr1	24556087	24609328	protein_coding	non-compact myelin associated protein	+	53242	4.10093	5.41133	1.36408	3.96703	7.27745e-05	0.000277013	up
DUSP8	chr11	1554051	1572848	protein_coding	dual specificity phosphatase 8	-	18798	167.534	1.11138	0.280175	3.96675	7.2858e-05	0.000277221	up
PVALB	chr22	36800703	36819499	protein_coding	parvalbumin	-	18797	15.4751	1.97037	0.497009	3.96446	7.35609e-05	0.000279611	up
STX11	chr6	144139963	144191939	protein_coding	syntaxin 11	+	51977	34.7762	1.24868	0.315164	3.96199	7.43278e-05	0.000282087	up
ONECUT1	chr15	52755053	52790336	protein_coding	one cut homeobox 1	-	35284	19.2243	1.69156	0.427011	3.96138	7.45169e-05	0.000282537	up
BST2	chr19	17402939	17405630	protein_coding	bone marrow stromal cell antigen 2	-	2692	10.2247	2.66049	0.672166	3.95809	7.55528e-05	0.000286171	up
TMEM132D-AS1	chr12	129109690	129113298	lncRNA	TMEM132D antisense RNA 1	+	3609	14.9795	2.01339	0.508963	3.95587	7.62568e-05	0.000288667	up
CNIH3-AS2	chr1	224608118	224616227	lncRNA	CNIH3 antisense RNA 2	-	8110	24.3092	1.46409	0.370752	3.94898	7.84843e-05	0.000296632	up
TARID	chr6	133502252	133889006	lncRNA	TCF21 antisense RNA inducing promoter demethylation	-	386755	13.4857	2.17536	0.55134	3.94559	7.96035e-05	0.000300743	up
MYRIP	chr3	39808914	40260321	protein_coding	myosin VIIA and Rab interacting protein	+	451408	20.5296	1.67454	0.424433	3.94536	7.9679e-05	0.000300969	up
DNAH10	chr12	123762301	123935720	protein_coding	dynein axonemal heavy chain 10	+	173420	31.1908	1.28309	0.325395	3.94317	8.04109e-05	0.000303555	up
PRKN	chr6	161347417	162727766	protein_coding	parkin RBR E3 ubiquitin protein ligase	-	1380350	17.899	1.78949	0.454107	3.94067	8.12543e-05	0.000306438	up
LOC124904282	chr18	34967191	34973737	lncRNA	uncharacterized LOC124904282	-	6547	11.0623	2.41553	0.61339	3.938	8.21624e-05	0.000309619	up
CABP7	chr22	29720003	29731833	protein_coding	calcium binding protein 7	+	11831	19.2084	1.69253	0.429962	3.93647	8.26885e-05	0.000311358	up
TUNAR	chr14	95876448	95925571	protein_coding	TCL1 upstream neural differentiation-associated RNA	+	49124	11.2319	2.43812	0.619367	3.93647	8.26878e-05	0.000311358	up
SNTG2	chr2	950849	1367613	protein_coding	syntrophin gamma 2	+	416765	32.9646	1.24632	0.317033	3.93121	8.45209e-05	0.000317884	up
BIRC3	chr11	102317484	102339403	protein_coding	baculoviral IAP repeat containing 3	+	21920	15.6355	1.8918	0.483219	3.91499	9.04079e-05	0.000338501	up
WDFY4	chr10	48684873	48982956	protein_coding	WDFY family member 4	+	298084	3.95078	5.35671	1.37019	3.90946	9.25027e-05	0.000345872	up
CT75	chr2	222318471	222357910	lncRNA	cancer/testis associated transcript 75	+	39440	33.1635	1.22019	0.312567	3.90376	9.47085e-05	0.00035357	up
FREM3	chr4	143577302	143700675	protein_coding	FRAS1 related extracellular matrix 3	-	123374	6.49815	5.07311	1.30033	3.90139	9.56419e-05	0.000356777	up
CDH26	chr20	59958423	60035934	protein_coding	cadherin 26	+	77512	34.0465	-1.21156	0.310584	-3.90092	9.58289e-05	0.000357336	down
LOC105374122	chr3	135354792	135516378	lncRNA	uncharacterized LOC105374122	-	161587	37.254	1.15896	0.297804	3.8917	9.95458e-05	0.000370405	up
PPP1R3A	chr7	113876777	113919009	protein_coding	protein phosphatase 1 regulatory subunit 3A	-	42233	3.95398	5.35757	1.37778	3.88854	0.000100848	0.000374743	up
GRIN2C	chr17	74842023	74861532	protein_coding	glutamate ionotropic receptor NMDA type subunit 2C	-	19510	29.539	1.29521	0.333169	3.88754	0.000101265	0.000376145	up
RSPO2	chr8	107899316	108083620	protein_coding	R-spondin 2	-	184305	13.0218	2.11313	0.543889	3.88522	0.000102238	0.00037954	up
RAB27B	chr18	54717857	54895516	protein_coding	RAB27B, member RAS oncogene family	+	177660	30.5323	1.28008	0.329523	3.88465	0.000102477	0.000380355	up
IL1R1	chr2	102070390	102179874	protein_coding	interleukin 1 receptor type 1	+	109485	45.49	1.04575	0.269225	3.88431	0.000102621	0.000380814	up
LYPD3	chr19	43460787	43465608	protein_coding	LY6/PLAUR domain containing 3	-	4822	27.7483	1.33891	0.345006	3.88084	0.000104098	0.000385924	up
FAM107A	chr3	58564117	58627610	protein_coding	family with sequence similarity 107 member A	-	63494	6.32747	5.0345	1.29918	3.87513	0.000106568	0.000394626	up
HTR1B	chr6	77460924	77463491	protein_coding	5-hydroxytryptamine receptor 1B	-	2568	9.43311	2.74899	0.709511	3.87448	0.000106852	0.000395447	up
MYOCD	chr17	12665890	12768949	protein_coding	myocardin	+	103060	6.626	5.10434	1.31754	3.87414	0.000107004	0.000395933	up
FRMD3-AS1	chr9	83219345	83270833	lncRNA	FRMD3 antisense RNA 1	+	51489	11.5457	2.32675	0.601389	3.86896	0.000109302	0.000403737	up
SSTR1	chr14	38207904	38213067	protein_coding	somatostatin receptor 1	+	5164	9.92833	2.60899	0.674716	3.86679	0.000110275	0.000407018	up
NECTIN1-DT	chr11	119729583	119739623	lncRNA	NECTIN1 divergent transcript	+	10041	8.46382	3.11646	0.806665	3.86339	0.000111826	0.000412426	up
PTGER3	chr1	70852358	71047816	protein_coding	prostaglandin E receptor 3	-	195459	9.43159	2.74531	0.711054	3.8609	0.000112969	0.000416241	up
LINC00494	chr20	48359911	48370638	lncRNA	long intergenic non-protein coding RNA 494	+	10728	7.63561	3.76255	0.975461	3.8572	0.000114695	0.000422115	up
FIBCD1	chr9	130902440	130940709	protein_coding	fibrinogen C domain containing 1	-	38270	20.0341	1.63003	0.422776	3.85555	0.00011547	0.000424725	up
FABP7	chr6	122749201	122784074	protein_coding	fatty acid binding protein 7	+	34874	3.78929	5.29688	1.37413	3.85472	0.00011586	0.000425915	up
JPH4	chr14	23568038	23578790	protein_coding	junctophilin 4	-	10753	3.78929	5.29688	1.37413	3.85472	0.00011586	0.000425915	up
CHST13	chr3	126524155	126543291	protein_coding	carbohydrate sulfotransferase 13	+	19137	14.6337	1.97667	0.512985	3.85327	0.00011655	0.00042819	up
LOC105370261	chr13	76267495	76281267	lncRNA	uncharacterized LOC105370261	+	13773	7.61246	4.37984	1.13817	3.84816	0.000119008	0.000436568	up
KLK8	chr19	50996008	51001604	protein_coding	kallikrein related peptidase 8	-	5597	10.2544	2.46517	0.642513	3.83677	0.000124664	0.000455923	up
LNCDAT	chr6	166168097	166171172	lncRNA	lncRNA divergent activator of TBXT	+	3076	15.8086	1.81757	0.473731	3.83672	0.000124689	0.000455927	up
RBP5	chr12	7115736	7130005	protein_coding	retinol binding protein 5	-	14270	19.2355	1.62215	0.42283	3.83642	0.000124842	0.000456401	up
IPO9-AS1	chr1	201688256	201829559	lncRNA	IPO9 antisense RNA 1	-	141304	34.9729	-1.14562	0.298896	-3.83284	0.000126672	0.000462827	down
PLPPR5	chr1	98890245	99005786	protein_coding	phospholipid phosphatase related 5	-	115542	18.2498	1.66938	0.435692	3.83156	0.000127331	0.000465058	up
H3C10	chr6	27810051	27810536	protein_coding	H3 clustered histone 10	+	486	16.3648	-1.731	0.452182	-3.8281	0.000129139	0.000471301	down
PLPPR1	chr9	101028727	101325135	protein_coding	phospholipid phosphatase related 1	+	296409	8.29131	3.08758	0.807199	3.82506	0.000130742	0.000476159	up
ALOXE3	chr17	8095900	8118916	protein_coding	arachidonate lipoxygenase 3	-	23017	40.5584	1.06893	0.279462	3.82497	0.000130788	0.000476236	up
ADCY10	chr1	167809386	167914134	protein_coding	adenylate cyclase 10	-	104749	14.0145	2.00314	0.524033	3.82254	0.000132086	0.000480689	up
VIT	chr2	36696707	36814794	protein_coding	vitrin	+	118088	3.78882	5.29676	1.38603	3.82154	0.000132622	0.000482457	up
GTF2I-AS1	chr7	74688937	74728918	lncRNA	GTF2I antisense RNA 1	-	39982	16.5429	-1.75203	0.458802	-3.81871	0.000134152	0.000487746	down
EVA1C	chr21	32411723	32515387	protein_coding	eva-1 homolog C	+	103665	18.5844	1.70436	0.447148	3.81162	0.000138057	0.000501159	up
CXCL6	chr4	73836678	73838760	protein_coding	C-X-C motif chemokine ligand 6	+	2083	9.11937	2.69081	0.70764	3.80251	0.000143238	0.000518912	up
BCO2	chr11	112175512	112218946	protein_coding	beta-carotene oxygenase 2	+	43435	29.223	1.27318	0.335841	3.79103	0.000150021	0.000541751	up
LOC107984906	chr16	1107637	1113399	lncRNA	uncharacterized LOC107984906	+	5763	3.62891	5.23478	1.38375	3.78304	0.000154926	0.000557786	up
LOC107985567	chr22	41675202	41677160	protein_coding	protein LLP homolog	-	1959	38.1578	-1.15395	0.305201	-3.78095	0.000156229	0.000562162	down
LINC02575	chr21	44485571	44491142	lncRNA	long intergenic non-protein coding RNA 2575	+	5572	14.1808	1.91559	0.506994	3.77834	0.00015788	0.000567465	up
MMD2	chr7	4892245	4959187	protein_coding	monocyte to macrophage differentiation associated 2	-	66943	7.3138	3.69387	0.977936	3.7772	0.000158599	0.000569942	up
CELF3	chr1	151700058	151716803	protein_coding	CUGBP Elav-like family member 3	-	16746	15.65	1.7982	0.476239	3.77583	0.000159474	0.000572871	up
LINC02772	chr1	157275095	157283966	lncRNA	long intergenic non-protein coding RNA 2772	+	8872	15.1657	1.83541	0.486124	3.7756	0.000159623	0.000573194	up
ZNF843	chr16	31435434	31443160	protein_coding	zinc finger protein 843	-	7727	21.7141	1.46806	0.38933	3.77072	0.000162776	0.000583859	up
PTPRR	chr12	70638073	70920738	protein_coding	protein tyrosine phosphatase receptor type R	-	282666	7.31193	3.69456	0.981269	3.76509	0.000166492	0.000595743	up
FMO1	chr1	171248494	171285978	protein_coding	flavin containing dimethylaniline monoxygenase 1	+	37485	3.63489	5.23648	1.3913	3.76373	0.000167396	0.000598532	up
CCDC183	chr9	136796338	136807741	protein_coding	coiled-coil domain containing 183	+	11404	42.4983	1.08512	0.288381	3.76281	0.000168017	0.000600419	up
LOC124903281	chr14	20653312	20662413	lncRNA	uncharacterized LOC124903281	+	9102	12.058	2.10766	0.56045	3.76067	0.000169461	0.000605239	up
NLRP1	chr17	5501396	5584509	protein_coding	NLR family pyrin domain containing 1	-	83114	17.7708	1.69515	0.450888	3.75957	0.000170205	0.000607447	up
LOC112267988	chr7	143836763	143860209	lncRNA	uncharacterized LOC112267988	+	23447	14.6724	1.87397	0.498632	3.75822	0.000171126	0.000610392	up
WNT8A	chr5	138077367	138092365	protein_coding	Wnt family member 8A	+	14999	7.97801	3.02474	0.804897	3.75792	0.000171329	0.000611004	up
CAMK1G	chr1	209583714	209613939	protein_coding	calcium/calmodulin dependent protein kinase IG	+	30226	5.85556	4.91924	1.312	3.74941	0.000177248	0.000630357	up
BLACAT1	chr1	205434886	205456045	protein_coding	BLACAT1 overlapping LEMD1 locus	-	21160	7.31562	3.69724	0.987926	3.74243	0.000182249	0.000646466	up
SLC26A4-AS1	chr7	107656516	107661798	lncRNA	SLC26A4 antisense RNA 1	-	5283	19.0913	1.67611	0.448018	3.74117	0.000183163	0.000649351	up
GBP1P1	chr1	89407679	89424934	transcribed_pseudogene	guanylate binding protein 1 pseudogene 1	+	17256	35.8064	1.13884	0.30586	3.72341	0.00019655	0.000692465	up
GBP2	chr1	89106132	89126114	protein_coding	guanylate binding protein 2	-	19983	7.30251	3.69721	0.992979	3.72335	0.000196601	0.000692517	up
MGAT4C	chr12	85955667	86839000	protein_coding	MGAT4 family member C	-	883334	5.69387	4.87851	1.31113	3.72085	0.00019855	0.000698998	up
NAT16	chr7	101170496	101180293	protein_coding	N-acetyltransferase 16 (putative)	-	9798	3.47393	5.17147	1.39005	3.72034	0.000198957	0.000700303	up
KCNK13	chr14	90061994	90185853	protein_coding	potassium two pore domain channel subfamily K member 13	+	123860	22.867	1.39808	0.375895	3.71935	0.000199739	0.000702799	up
CALCRL	chr2	187341964	187448252	protein_coding	calcitonin receptor like receptor	-	106289	42.4106	1.02409	0.275434	3.71811	0.000200721	0.000705608	up
PRODH	chr22	18912781	18936553	protein_coding	proline dehydrogenase 1	-	23773	28.7323	1.27895	0.344208	3.71563	0.000202696	0.000711638	up
GRM8	chr7	126438598	127252941	protein_coding	glutamate metabotropic receptor 8	-	814344	13.5307	1.94247	0.523243	3.71237	0.000205325	0.000720081	up
CLPSL2	chr6	35776598	35779552	protein_coding	colipase like 2	+	2955	10.4225	2.3137	0.623834	3.70884	0.000208211	0.000729271	up
LRRIQ1	chr12	85036351	85272805	protein_coding	leucine rich repeats and IQ motif containing 1	+	236455	39.9248	1.08857	0.29381	3.70502	0.000211374	0.000739944	up
JAKMIP1-DT	chr4	6200733	6233936	lncRNA	JAKMIP1 divergent transcript	+	33204	23.3423	1.38615	0.374181	3.7045	0.000211809	0.000741332	up
FXYD1	chr19	35137188	35143109	protein_coding	FXYD domain containing ion transport regulator 1	+	5922	7.48568	3.27774	0.885359	3.70215	0.000213777	0.000747676	up
KCNH5	chr14	62699464	63045458	protein_coding	potassium voltage-gated channel subfamily H member 5	-	345995	9.27335	2.72347	0.735691	3.70192	0.000213974	0.000748091	up
RUNDC3A-AS1	chr17	44299574	44308431	lncRNA	RUNDC3A antisense RNA 1	-	8858	36.1452	1.09466	0.295812	3.70055	0.000215137	0.000751673	up
LINC01405	chr12	110936602	110937448	lncRNA	long intergenic non-protein coding RNA 1405	+	847	5.71129	4.8811	1.31945	3.69934	0.000216164	0.000754922	up
SOWAHB	chr4	76894152	76898144	protein_coding	sosondowah ankyrin repeat domain family member B	-	3993	22.6611	1.49705	0.404696	3.6992	0.00021628	0.000755192	up
LOC105370867	chr15	66019389	66020698	lncRNA	uncharacterized LOC105370867	-	1310	11.0744	2.4138	0.653302	3.69477	0.000220084	0.000767499	up
LINC02982	chr5	987177	997340	lncRNA	long intergenic non-protein coding RNA 2982	-	10164	21.229	1.48481	0.402126	3.69241	0.000222141	0.000774106	up
SPATA3-AS1	chr2	230984368	230996032	lncRNA	SPATA3 antisense RNA 1 (head to head)	-	11665	36.9617	1.08013	0.292589	3.69163	0.000222826	0.000775932	up
HOXA-AS2	chr7	27121919	27128760	lncRNA	HOXA cluster antisense RNA 2	+	6842	34.3262	-1.13569	0.307694	-3.69097	0.000223401	0.000777795	down
LOC105370213	chr13	54792969	54842090	lncRNA	uncharacterized LOC105370213	+	49122	16.8565	-1.71195	0.464012	-3.68945	0.000224738	0.000781882	down
CFAP43	chr10	104129888	104232364	protein_coding	cilia and flagella associated protein 43	-	102477	38.9654	1.03926	0.28176	3.68845	0.000225624	0.000784683	up
SGCG	chr13	23160508	23325162	protein_coding	sarcoglycan gamma	+	164655	3.47881	5.17294	1.40252	3.68832	0.000225739	0.000784939	up
ARHGAP27P2	chr17	68198660	68200302	transcribed_pseudogene	Rho GTPase activating protein 27 pseudogene 2	+	1643	12.0656	2.10883	0.572888	3.68105	0.000232277	0.000805632	up
DNAJC5B	chr8	66014978	66101245	protein_coding	DnaJ heat shock protein family (Hsp40) member C5 beta	+	86268	5.53703	4.8364	1.31575	3.67579	0.000237116	0.000821674	up
IGFBP7	chr4	57030773	57110385	protein_coding	insulin like growth factor binding protein 7	-	79613	26.2867	1.32321	0.360043	3.67514	0.000237718	0.000823465	up
CDH15	chr16	89171748	89195492	protein_coding	cadherin 15	+	23745	16.3032	1.69934	0.462607	3.67339	0.000239352	0.000828675	up
CLDN6	chr16	3014712	3018183	protein_coding	claudin 6	-	3472	19.27	1.55545	0.423474	3.67308	0.000239646	0.000829505	up
EPCAM	chr2	47369311	47387020	protein_coding	epithelial cell adhesion molecule	+	17710	39.2927	1.08503	0.295476	3.67213	0.000240533	0.000832016	up
RNLS	chr10	88171523	88583318	protein_coding	renalase, FAD dependent amine oxidase	-	411796	11.9005	2.08587	0.568246	3.67071	0.000241879	0.000835919	up
LOC124904701	chr19	35090948	35113669	protein_coding	hepatitis A virus cellular receptor 1-like	+	22722	31.7186	1.16654	0.317838	3.67025	0.000242314	0.000837269	up
CFAP206	chr6	87407972	87464465	protein_coding	cilia and flagella associated protein 206	+	56494	20.5728	1.48357	0.404759	3.6653	0.000247045	0.00085224	up
PSD	chr10	102402619	102419946	protein_coding	pleckstrin and Sec7 domain containing	-	17328	29.9103	1.19729	0.327342	3.65763	0.00025456	0.000876304	up
LOC112268114	chr13	94712720	94713443	lncRNA	uncharacterized LOC112268114	-	724	13.0296	1.99184	0.545119	3.65396	0.000258226	0.00088826	up
LGI1	chr10	93757936	93798159	protein_coding	leucine rich glioma inactivated 1	+	40224	11.7361	2.19954	0.602173	3.65267	0.000259531	0.000891883	up
CNN1	chr19	11538851	11550323	protein_coding	calponin 1	+	11473	6.83828	3.59284	0.985225	3.64672	0.00026561	0.000910725	up
ENPP3	chr6	131637302	131747410	protein_coding	ectonucleotide pyrophosphatase/phosphodiesterase 3	+	110109	15.8159	1.72782	0.473851	3.64635	0.000265993	0.000911874	up
DNAAF1	chr16	84145308	84177920	protein_coding	dynein axonemal assembly factor 1	+	32613	16.1347	1.76451	0.484284	3.64354	0.000268916	0.000921403	up
ARTN	chr1	43933801	43937240	protein_coding	artemin	+	3440	24.6828	1.33829	0.367323	3.64337	0.000269091	0.000921767	up
OR1F1	chr16	3188204	3206556	protein_coding	olfactory receptor family 1 subfamily F member 1	+	18353	35.8535	1.10679	0.304039	3.64028	0.000272342	0.000931976	up
ANO2	chr12	5562655	5946232	protein_coding	anoctamin 2	-	383578	9.30119	2.49757	0.686393	3.63869	0.000274026	0.000937072	up
KANK4	chr1	62236165	62319434	protein_coding	KN motif and ankyrin repeat domains 4	-	83270	9.79091	2.38489	0.655509	3.63822	0.000274526	0.000938615	up
IGLON5	chr19	51311644	51330891	protein_coding	IgLON family member 5	+	19248	6.66288	4.17666	1.14831	3.63723	0.000275586	0.000941571	up
UGT3A1	chr5	35951006	36001022	protein_coding	UDP glycosyltransferase family 3 member A1	-	50017	3.3125	5.10327	1.40343	3.63629	0.000276596	0.000944683	up
PAX5	chr9	36833269	37034268	protein_coding	paired box 5	-	201000	12.5511	2.04597	0.562831	3.63515	0.000277819	0.000948524	up
CEND1	chr11	787115	790090	protein_coding	cell cycle exit and neuronal differentiation 1	-	2976	8.64487	2.60009	0.717762	3.6225	0.000291772	0.000992283	up
CHRNA9	chr4	40335333	40355217	protein_coding	cholinergic receptor nicotinic alpha 9 subunit	+	19885	6.99031	3.62569	1.00169	3.61957	0.000295089	0.00100285	up
SMIM43	chr4	121758930	121765400	protein_coding	small integral membrane protein 43	-	6471	41.2437	1.09977	0.304017	3.61746	0.000297507	0.00101036	up
NKX2-8	chr14	36580004	36582614	protein_coding	NK2 homeobox 8	-	2611	38.3042	1.06044	0.293459	3.61359	0.000301987	0.00102394	up
IL11	chr19	55364382	55370463	protein_coding	interleukin 11	-	6082	7.66797	2.95958	0.819417	3.61182	0.000304059	0.00103042	up
MIR25	chr7	100093560	100093643	miRNA	microRNA 25	-	84	32.8086	-1.13574	0.314514	-3.6111	0.000304896	0.00103308	down
USH2A	chr1	215622891	216423448	protein_coding	usherin	-	800558	7.16533	3.21302	0.890939	3.60633	0.000310564	0.00105098	up
LINC01623	chr6	28859625	28863677	lncRNA	long intergenic non-protein coding RNA 1623	-	4053	6.50183	4.13909	1.15208	3.59271	0.000327261	0.00110321	up
TAFA3	chr1	112718905	112727235	protein_coding	TAFA chemokine like family member 3	+	8331	6.68379	3.55365	0.990124	3.5891	0.000331826	0.00111743	up
CLCNKB	chr1	16043782	16057326	protein_coding	chloride voltage-gated channel Kb	+	13545	26.6361	1.25765	0.350732	3.58578	0.000336077	0.00113094	up
FEV	chr2	218981087	218985184	protein_coding	FEV transcription factor, ETS family member	-	4098	6.50656	4.13898	1.15468	3.58454	0.000337676	0.00113568	up
DNAJC5G	chr2	27275433	27281499	protein_coding	DnaJ heat shock protein family (Hsp40) member C5 gamma	+	6067	10.6027	2.17739	0.608134	3.58045	0.000343003	0.00115244	up
CD68	chr17	7579638	7582111	protein_coding	CD68 molecule	+	2474	26.0665	-1.24606	0.348076	-3.57986	0.00034378	0.00115485	down
LOC105373414	chr2	9102704	9109859	lncRNA	uncharacterized LOC105373414	+	7156	5.23032	4.75068	1.32793	3.57752	0.000346864	0.00116399	up
LOC124906200	chr3	85039033	85048927	lncRNA	uncharacterized LOC124906200	+	9895	24.6718	1.38957	0.388549	3.57629	0.000348502	0.00116887	up
VWA5A	chr11	124115450	124147721	protein_coding	von Willebrand factor A domain containing 5A	+	32272	25.0057	1.31858	0.368858	3.57476	0.000350545	0.0011747	up
LOC107984871	chr16	88936778	88940103	lncRNA	uncharacterized LOC107984871	-	3326	10.1075	2.2615	0.633518	3.56974	0.000357335	0.00119516	up
GACAT2	chr18	8695856	8707621	lncRNA	gastric cancer associated transcript 2	-	11766	23.8404	1.32333	0.371293	3.5641	0.000365103	0.0012186	up
GDA	chr9	72114608	72259869	protein_coding	guanine deaminase	+	145262	8.45153	2.82022	0.791337	3.56387	0.000365431	0.00121948	up
LMNTD1	chr12	25476082	25648578	protein_coding	lamin tail domain containing 1	-	172497	8.9786	2.43913	0.685581	3.55776	0.000374034	0.00124667	up
CRB2	chr9	123354065	123380326	protein_coding	crumbs cell polarity complex component 2	+	26262	9.76231	2.38324	0.669894	3.55764	0.000374202	0.00124702	up
UNC80	chr2	209771832	209999296	protein_coding	unc-80 homolog, NALCN channel complex subunit	+	227465	8.97162	2.43825	0.685847	3.5551	0.000377838	0.00125782	up
CHODL	chr21	17917340	18267370	protein_coding	chondrolectin	+	350031	14.5258	1.75676	0.494651	3.55152	0.000383019	0.00127331	up
CD80	chr3	119524293	119559614	protein_coding	CD80 molecule	-	35322	5.07032	4.70426	1.32476	3.55103	0.000383729	0.00127545	up
LOC124903996	chr17	39200155	39201214	lncRNA	uncharacterized LOC124903996	-	1060	26.0871	-1.41918	0.400279	-3.54549	0.000391891	0.00130078	down
CBR3-AS1	chr21	36131767	36156308	lncRNA	CBR3 antisense RNA 1	-	24542	17.8162	1.54595	0.436682	3.54022	0.00039979	0.00132448	up
METTL24	chr6	110243940	110358349	protein_coding	methyltransferase like 24	-	114410	25.1251	1.33064	0.37668	3.53254	0.000411584	0.00136003	up
RAG1	chr11	36510353	36579762	protein_coding	recombination activating 1	+	69410	27.3155	1.21961	0.345471	3.53029	0.000415105	0.00137143	up
LOC124901306	chr6	33844004	33846832	lncRNA	uncharacterized LOC124901306	+	2829	6.51202	3.51666	0.997355	3.52599	0.0004219	0.00139268	up
P2RX7	chr12	121132876	121188032	protein_coding	purinergic receptor P2X 7	+	55157	6.4969	4.13726	1.17351	3.52554	0.000422627	0.00139484	up
CNR1	chr6	88139864	88167349	protein_coding	cannabinoid receptor 1	-	27486	8.00209	2.72813	0.774057	3.52446	0.000424347	0.00139932	up
KCNQ3	chr8	132120861	132481095	protein_coding	potassium voltage-gated channel subfamily Q member 3	-	360235	3.15862	5.03414	1.42882	3.52329	0.000426219	0.00140477	up
CCDC39	chr3	180614008	180679489	protein_coding	coiled-coil domain containing 39	-	65482	16.3295	1.61504	0.458533	3.52219	0.000427992	0.0014094	up
IL15	chr4	141636583	141733987	protein_coding	interleukin 15	+	97405	8.98555	2.43794	0.692374	3.52114	0.000429703	0.00141334	up
ASGR1	chr17	7173431	7179370	protein_coding	asialoglycoprotein receptor 1	-	5940	20.5673	1.42319	0.404895	3.51497	0.000439809	0.00144244	up
LOC107985576	chr22	37259472	37265824	lncRNA	uncharacterized LOC107985576	-	6353	8.49702	2.56888	0.730936	3.51451	0.000440562	0.00144412	up
BRPF3-AS1	chr6	36146692	36196965	lncRNA	BRPF3 antisense RNA 1	-	50274	25.5254	1.26153	0.359299	3.51109	0.000446278	0.00146136	up
GMNC	chr3	190843271	190862694	protein_coding	geminin coiled-coil domain containing	-	19424	11.8873	2.08682	0.59455	3.50991	0.000448251	0.00146682	up
HOXC12	chr12	53954903	53958956	protein_coding	homeobox C12	+	4054	28.7767	1.19952	0.34199	3.50745	0.000452417	0.00147919	up
LOC100507351	chr17	77546941	77565024	lncRNA	uncharacterized LOC100507351	+	18084	7.0146	3.17511	0.905283	3.50732	0.000452648	0.00147969	up
LOC124902908	chr12	29134651	29141574	lncRNA	uncharacterized LOC124902908	-	6924	19.6078	1.45406	0.414896	3.50463	0.000457244	0.0014937	up
PRKG1-AS1	chr10	52296848	52314128	lncRNA	PRKG1 antisense RNA 1	-	17281	6.36748	3.47844	0.9968	3.4896	0.000483736	0.00157196	up
GAL3ST4	chr7	100159244	100168617	protein_coding	galactose-3-O-sulfotransferase 4	-	9374	15.666	1.71014	0.490185	3.48876	0.000485261	0.00157611	up
LOC105377253	chr4	63462446	63513456	lncRNA	uncharacterized LOC105377253	-	51011	3.15689	5.03356	1.44328	3.48759	0.000487395	0.00158224	up
LOC112268093	chr12	22303944	22315946	lncRNA	uncharacterized LOC112268093	-	12003	3.00086	4.96019	1.42428	3.48259	0.00049658	0.00160942	up
PRTN3	chr19	840999	848175	protein_coding	proteinase 3	+	7177	6.36202	3.4775	0.999183	3.48035	0.000500767	0.00162236	up
SLC6A20	chr3	45755449	45796536	protein_coding	solute carrier family 6 member 20	-	41088	9.47371	2.32757	0.668901	3.47969	0.000501993	0.00162469	up
NYAP1	chr7	100483927	100494802	protein_coding	neuronal tyrosine phosphorylated phosphoinositide-3-kinase adaptor 1	+	10876	34.3956	1.05276	0.302809	3.47664	0.000507738	0.0016408	up
KCNA1	chr12	4909905	4918256	protein_coding	potassium voltage-gated channel subfamily A member 1	+	8352	6.86168	3.1397	0.903333	3.47568	0.000509551	0.00164521	up
HTR7	chr10	90740823	90858039	protein_coding	5-hydroxytryptamine receptor 7	-	117217	21.5789	1.39673	0.402782	3.46771	0.00052491	0.00169231	up
NPIPB11	chr16	29381167	29406711	protein_coding	nuclear pore complex interacting protein family member B11	-	25545	31.9635	-1.11264	0.32087	-3.46757	0.000525191	0.00169293	down
DRAXIN	chr1	11686635	11725857	protein_coding	dorsal inhibitory axon guidance protein	+	39223	9.4701	2.32602	0.670843	3.46731	0.000525689	0.00169425	up
CATSPERG	chr19	38335830	38370943	protein_coding	cation channel sperm associated auxiliary subunit gamma	+	35114	16.1615	1.59836	0.461087	3.46649	0.000527296	0.00169914	up
AVPR1B	chr1	206106936	206117388	protein_coding	arginine vasopressin receptor 1B	-	10453	6.69398	3.10116	0.897212	3.45644	0.000547355	0.00175994	up
FAM178B	chr2	96875885	96986580	protein_coding	family with sequence similarity 178 member B	-	110696	4.75601	4.60835	1.3346	3.45298	0.000554424	0.00178148	up
LINC03027	chr10	22435425	22437929	lncRNA	long intergenic non-protein coding RNA 3027	-	2505	29.2531	-1.16927	0.338714	-3.45208	0.000556283	0.00178716	down
DOCK10	chr2	224765090	225042468	protein_coding	dedicator of cytokinesis 10	-	277379	6.36197	3.47654	1.00718	3.45176	0.000556941	0.00178897	up
LETR1	chr15	95279288	95327100	lncRNA	lymphatic endothelial transcriptional regulator lncRNA 1	-	47813	14.704	1.68152	0.487504	3.44924	0.000562171	0.00180426	up
GRP	chr18	59219189	59230771	protein_coding	gastrin releasing peptide	+	11583	4.75562	4.60848	1.33658	3.44798	0.000564795	0.00181178	up
TIGD4	chr4	152769354	152779730	protein_coding	tigger transposable element derived 4	-	10377	22.0607	1.32796	0.385278	3.44675	0.000567373	0.00181883	up
HOPX	chr4	56647998	56681706	protein_coding	HOP homeobox	-	33709	30.2746	1.10598	0.32101	3.44531	0.000570414	0.00182736	up
DIRAS2	chr9	90609832	90642824	protein_coding	DIRAS family GTPase 2	-	32993	12.2567	1.87858	0.545823	3.44174	0.000577988	0.00184947	up
HHIP-AS1	chr4	144642916	144646019	lncRNA	HHIP antisense RNA 1	-	3104	36.6768	1.03185	0.30015	3.43776	0.000586538	0.00187464	up
ZNF280A	chr22	22513736	22520270	protein_coding	zinc finger protein 280A	-	6535	18.6391	1.49131	0.43383	3.43754	0.000587015	0.0018755	up
LOC124901296	chr6	28837241	28839023	lncRNA	uncharacterized LOC124901296	-	1783	24.6977	1.24204	0.361952	3.4315	0.00060025	0.00191559	up
NTRK1	chr1	156815750	156881850	protein_coding	neurotrophic receptor tyrosine kinase 1	+	66101	21.5791	1.33982	0.390719	3.42912	0.000605539	0.00193119	up
LOC112268076	chr11	67812009	67966160	protein_coding	translation initiation factor IF-2-like	-	154152	17.4913	1.51009	0.440952	3.4246	0.000615695	0.00195935	up
RIMS1	chr6	71886550	72403145	protein_coding	regulating synaptic membrane exocytosis 1	+	516596	30.1118	1.16897	0.341682	3.42122	0.000623406	0.00198144	up
BEND5	chr1	48727519	48776891	protein_coding	BEN domain containing 5	-	49373	11.7698	1.93012	0.564194	3.42103	0.000623842	0.00198204	up
LOC105375102	chr6	57811096	57822641	lncRNA	uncharacterized LOC105375102	-	11546	6.53436	3.0637	0.896524	3.41731	0.000632438	0.00200732	up
MEOX1	chr17	43640389	43661922	protein_coding	mesenchyme homeobox 1	-	21534	25.0478	1.22262	0.358138	3.41381	0.000640609	0.00203124	up
MATN1-AS1	chr1	30718772	30726746	lncRNA	MATN1 antisense RNA 1	+	7975	29.7526	1.14932	0.336735	3.41312	0.000642231	0.00203571	up
TLR1	chr4	38787569	38805644	protein_coding	toll like receptor 1	-	18076	11.5688	2.03422	0.597292	3.40574	0.000659857	0.00208745	up
FSIP2	chr2	185737134	185833290	protein_coding	fibrous sheath interacting protein 2	+	96157	25.0272	1.22144	0.358909	3.4032	0.000666015	0.00210623	up
SYT9-AS1	chr11	7437627	7465835	lncRNA	SYT9 antisense RNA 1	-	28209	9.14338	2.26905	0.667192	3.40089	0.000671665	0.00212375	up
LINC01569	chr16	4245825	4253789	lncRNA	long intergenic non-protein coding RNA 1569	-	7965	33.2108	1.08511	0.319443	3.39689	0.000681568	0.00215223	up
KLK10	chr19	51012739	51020097	protein_coding	kallikrein related peptidase 10	-	7359	2.84588	4.88326	1.44044	3.39013	0.000698606	0.00220025	up
WDR72	chr15	53513741	53762878	protein_coding	WD repeat domain 72	-	249138	16.1617	1.59568	0.470817	3.38918	0.000701022	0.00220677	up
OAZ3	chr1	151762969	151771330	protein_coding	ornithine decarboxylase antizyme 3	+	8362	25.5378	-1.20396	0.355589	-3.38583	0.000709626	0.00223166	down
GPR88	chr1	100538139	100542021	protein_coding	G protein-coupled receptor 88	+	3883	4.58873	4.55581	1.3457	3.38547	0.000710574	0.00223428	up
CFHR1	chr1	196819731	196832189	protein_coding	complement factor H related 1	+	12459	8.00648	2.47464	0.731359	3.38362	0.000715368	0.00224782	up
CLXN	chr8	48710789	48735311	protein_coding	calaxin	-	24523	2.98795	4.95557	1.4654	3.38172	0.000720344	0.00226204	up
CYP24A1	chr20	54143538	54173986	protein_coding	cytochrome P450 family 24 subfamily A member 1	-	30449	5.88703	3.98432	1.17833	3.38133	0.000721357	0.00226411	up
LOC124902717	chr11	75234420	75239870	lncRNA	uncharacterized LOC124902717	-	5451	11.5912	1.90378	0.563703	3.37727	0.000732093	0.00229558	up
SLC6A12	chr12	183848	214157	protein_coding	solute carrier family 6 member 12	-	30310	20.4437	1.34879	0.399473	3.37642	0.000734367	0.00230156	up
SDR16C5	chr8	56300005	56320175	protein_coding	short chain dehydrogenase/reductase family 16C member 5	-	20171	5.71243	3.9417	1.16903	3.37178	0.000746837	0.00233835	up
BCO1	chr16	81238689	81291142	protein_coding	beta-carotene oxygenase 1	+	52454	7.50973	2.62665	0.779091	3.37142	0.000747809	0.00234101	up
ABCA4	chr1	93992834	94121148	protein_coding	ATP binding cassette subfamily A member 4	-	128315	4.5938	4.55753	1.35194	3.3711	0.0007487	0.00234304	up
ZNF648	chr1	182054570	182069646	protein_coding	zinc finger protein 648	-	15077	16.831	1.51347	0.449529	3.36678	0.000760507	0.00237651	up
BMERB1	chr16	15434588	15588259	protein_coding	bMERB domain containing 1	+	153672	6.87087	2.78011	0.827174	3.36098	0.000776677	0.00242428	up
ARMC12	chr6	35731524	35749079	protein_coding	armadillo repeat containing 12	+	17556	22.9032	1.29239	0.384977	3.35707	0.000787722	0.00245795	up
GPR4	chr19	45589764	45602212	protein_coding	G protein-coupled receptor 4	-	12449	6.21774	3.44329	1.02664	3.35393	0.000796726	0.00248403	up
DGUOK-AS1	chr2	73957967	73981439	lncRNA	DGUOK antisense RNA 1	-	23473	27.6476	1.15799	0.345314	3.35345	0.000798119	0.00248797	up
LOC124904712	chr19	38822840	38839851	lncRNA	uncharacterized LOC124904712	+	17012	30.2365	-1.13394	0.338402	-3.35087	0.000805592	0.00250964	down
KRT27	chr17	40776808	40782550	protein_coding	keratin 27	-	5743	5.723	3.94204	1.17884	3.34401	0.000825767	0.00256791	up
GOLGA6FP	chr15	77914217	77926846	transcribed_pseudogene	golgin A6 family member F, pseudogene	-	12630	9.96258	2.06671	0.619939	3.33373	0.000856894	0.00265825	up
ZDHHC8BP	chr22	23390605	23402612	transcribed_pseudogene	ZDHHC8B, pseudogene	-	12008	28.1715	1.11152	0.333494	3.33296	0.000859258	0.00266473	up
INSRR	chr1	156840063	156859117	protein_coding	insulin receptor related receptor	-	19055	6.38264	3.02278	0.907318	3.33156	0.00086362	0.00267653	up
KCNK6	chr19	38319845	38332076	protein_coding	potassium two pore domain channel subfamily K member 6	+	12232	22.7385	1.2782	0.383701	3.33125	0.00086457	0.00267904	up
POU6F2	chr7	38977909	39468601	protein_coding	POU class 6 homeobox 2	+	490693	21.1089	1.29388	0.388961	3.32651	0.000879415	0.00272284	up
MAP4K1-AS1	chr19	38596347	38601694	lncRNA	MAP4K1 antisense RNA 1	+	5348	14.2257	1.61916	0.488068	3.3175	0.000908272	0.00280451	up
SLC9A7P1	chr12	98453840	98457145	transcribed_pseudogene	solute carrier family 9 member 7 pseudogene 1	-	3306	17.6604	1.45739	0.440553	3.3081	0.000939309	0.00289105	up
ADRB1	chr10	114043866	114046904	protein_coding	adrenoceptor beta 1	+	3039	13.9109	1.67147	0.505528	3.30639	0.000945051	0.00290686	up
SPARCL1	chr4	87473335	87529376	protein_coding	SPARC like 1	-	56042	2.68387	4.7993	1.45181	3.30573	0.000947306	0.00291286	up
DPP4-DT	chr2	162074857	162077932	lncRNA	DPP4 divergent transcript	+	3076	2.68172	4.79848	1.45185	3.30507	0.000949521	0.00291812	up
IGFL4	chr19	46039182	46077629	protein_coding	IGF like family member 4	-	38448	14.7256	1.59066	0.481282	3.30504	0.000949624	0.00291812	up
SARDH	chr9	133659418	133739955	protein_coding	sarcosine dehydrogenase	-	80538	25.223	1.18892	0.359746	3.30489	0.000950136	0.00291923	up
ATP6V1G2-DDX39B	chr6	31530219	31546848	lncRNA	ATP6V1G2-DDX39B readthrough (NMD candidate)	-	16630	9.26176	-2.1147	0.639992	-3.30426	0.000952285	0.00292443	down
PLIN4	chr19	4502192	4518486	protein_coding	perilipin 4	-	16295	21.763	1.30056	0.393774	3.30281	0.000957201	0.00293812	up
NEXN-AS1	chr1	77881348	77889539	lncRNA	NEXN antisense RNA 1	-	8192	10.2976	1.96948	0.597415	3.29667	0.000978385	0.00299787	up
CPAMD8	chr19	16892951	17026810	protein_coding	C3 and PZP like alpha-2-macroglobulin domain containing 8	-	133860	19.6305	1.32984	0.403624	3.29475	0.000985076	0.0030179	up
PAX1	chr20	21705664	21718481	protein_coding	paired box 1	+	12818	8.84366	2.20806	0.670597	3.29268	0.000992369	0.0030383	up
LOC107985211	chr1	157173491	157191179	lncRNA	uncharacterized LOC107985211	+	17689	5.73463	3.31372	1.00827	3.28653	0.0010143	0.00309901	up
VWA5B1	chr1	20290875	20359518	protein_coding	von Willebrand factor A domain containing 5B1	+	68644	10.1388	2.09435	0.637727	3.28409	0.00102313	0.003124	up
C2CD4A	chr15	62066977	62070917	protein_coding	C2 calcium dependent domain containing 4A	+	3941	9.95939	2.06481	0.628861	3.28341	0.00102559	0.00313004	up
TBXT	chr6	166157656	166168655	protein_coding	T-box transcription factor T	-	11000	8.34932	2.31312	0.705266	3.27978	0.00103888	0.00316807	up
LOC124902384	chr10	16715997	16738204	lncRNA	uncharacterized LOC124902384	-	22208	17.8355	1.40389	0.428343	3.2775	0.00104729	0.00319171	up
PCOLCE-AS1	chr7	100589401	100604038	lncRNA	PCOLCE antisense RNA 1	-	14638	12.7518	1.7224	0.525645	3.27674	0.00105012	0.00319896	up
KCNIP1	chr5	170353487	170736632	protein_coding	potassium voltage-gated channel interacting protein 1	+	383146	6.72087	2.74117	0.836856	3.27555	0.00105455	0.00321076	up
PTN	chr7	137227341	137343733	protein_coding	pleiotrophin	-	116393	22.2763	1.28706	0.39305	3.27453	0.00105836	0.00322136	up
LOC100129434	chr2	56173534	56185770	lncRNA	uncharacterized LOC100129434	-	12237	5.55201	3.89749	1.19056	3.27366	0.00106163	0.00322977	up
LOC124904009	chr17	44325453	44327548	lncRNA	uncharacterized LOC124904009	+	2096	29.666	1.06127	0.324404	3.27143	0.00107005	0.00325177	up
MMP25	chr16	3046561	3060726	protein_coding	matrix metallopeptidase 25	+	14166	16.4737	-1.44693	0.442362	-3.27092	0.001072	0.00325719	down
TUBB8B	chr18	47212	73539	protein_coding	tubulin beta 8B	-	26328	17.1808	1.47565	0.451731	3.26667	0.00108821	0.0033033	up
ZACN	chr17	76079182	76082806	protein_coding	zinc activated ion channel	+	3625	14.4931	-1.66369	0.509495	-3.26538	0.00109319	0.00331759	down
RASA4B	chr7	102479976	102517777	protein_coding	RAS p21 protein activator 4B	-	37802	17.8242	1.40406	0.430044	3.26492	0.00109494	0.00332112	up
TMIE	chr3	46693778	46710886	protein_coding	transmembrane inner ear	+	17109	23.0987	1.25526	0.384586	3.26393	0.0010988	0.00333071	up
B3GNT3	chr19	17794791	17813576	protein_coding	UDP-GlcNAc:betaGal beta-1,3-N-acetylglucosaminyltransferase 3	+	18786	16.6928	1.49656	0.461345	3.24391	0.00117902	0.00355203	up
LMO1	chr11	8224309	8268787	protein_coding	LIM domain only 1	-	44479	23.2383	1.2201	0.376573	3.24	0.00119529	0.00359372	up
LOC124905133	chr22	44864279	44868242	lncRNA	uncharacterized LOC124905133	-	3964	13.2344	1.68292	0.519794	3.23766	0.00120512	0.00362159	up
CSMD3	chr8	112222928	113436939	protein_coding	CUB and Sushi multiple domains 3	-	1214012	4.12188	4.39448	1.35734	3.23757	0.00120553	0.00362225	up
MIXL1	chr1	226223664	226227060	protein_coding	Mix paired-like homeobox	+	3397	25.1812	1.19088	0.367973	3.23631	0.00121085	0.0036371	up
SENP3-EIF4A1	chr17	7561992	7579006	lncRNA	SENP3-EIF4A1 readthrough (NMD candidate)	+	17015	18.1511	-1.50609	0.465617	-3.23461	0.00121808	0.0036571	down
PITX3	chr10	102230189	102241512	protein_coding	paired like homeodomain 3	-	11324	30.4945	1.07966	0.333898	3.2335	0.00122282	0.00366847	up
ARHGAP40	chr20	38601809	38650653	protein_coding	Rho GTPase activating protein 40	+	48845	10.8074	1.90815	0.591108	3.2281	0.00124617	0.00373036	up
DOK7	chr4	3463306	3501482	protein_coding	docking protein 7	+	38177	21.6203	1.22916	0.380924	3.22678	0.00125193	0.00374642	up
NR5A1	chr9	124481236	124507399	protein_coding	nuclear receptor subfamily 5 group A member 1	-	26164	10.1558	1.94254	0.602924	3.22186	0.00127362	0.00380482	up
LOC124902814	chr11	113278437	113314456	lncRNA	uncharacterized LOC124902814	-	36020	10.1568	1.94076	0.602697	3.22013	0.00128131	0.00382661	up
FAM131B-AS1	chr7	143361706	143364265	lncRNA	FAM131B antisense RNA 1	+	2560	2.52837	4.7128	1.46536	3.21614	0.00129928	0.00387787	up
ANKRD20A4-ANKRD20A20P	chr9	64369394	64469242	lncRNA	ANKRD20A4-ANKRD20A20P readthrough	+	99849	29.8267	1.03623	0.32226	3.2155	0.00130216	0.00388525	up
PDGFD	chr11	103907189	104164147	protein_coding	platelet derived growth factor D	-	256959	2.52406	4.71106	1.46546	3.21472	0.00130571	0.00389341	up
NOX5	chr15	68930525	69062762	protein_coding	NADPH oxidase 5	+	132238	6.55321	2.70099	0.840302	3.21431	0.00130758	0.0038978	up
CR1L	chr1	207645133	207723703	protein_coding	complement C3b/C4b receptor 1 like	+	78571	26.3919	1.1437	0.35583	3.21418	0.00130816	0.00389892	up
HTR1F	chr3	87792706	87993839	protein_coding	5-hydroxytryptamine receptor 1F	+	201134	5.2387	3.80773	1.18626	3.20985	0.00132802	0.00395259	up
THBS1	chr15	39581079	39599466	protein_coding	thrombospondin 1	+	18388	5.57555	3.26686	1.01851	3.20748	0.00133902	0.00398411	up
LINC02615	chr4	128428016	128519398	lncRNA	long intergenic non-protein coding RNA 2615	+	91383	15.2208	1.56399	0.487904	3.20553	0.00134815	0.00400716	up
LOC105376267	chr9	123996108	123999387	lncRNA	uncharacterized LOC105376267	-	3280	17.6906	1.38693	0.432712	3.2052	0.00134969	0.0040091	up
MMRN2	chr10	86935540	86957615	protein_coding	multimerin 2	-	22076	6.39489	3.02321	0.943348	3.20477	0.00135172	0.00401442	up
LRRTM3	chr10	66926036	67101551	protein_coding	leucine rich repeat transmembrane neuronal 3	+	175516	4.11805	4.3935	1.37147	3.20349	0.00135774	0.00403043	up
LOC105378281	chr10	44967099	44971675	lncRNA	uncharacterized LOC105378281	-	4577	6.07096	2.9401	0.918267	3.20179	0.00136577	0.00405174	up
LOC107986676	chr6	170436232	170441020	lncRNA	uncharacterized LOC107986676	+	4789	2.53052	4.71369	1.47332	3.19936	0.00137732	0.00408288	up
C10orf71	chr10	49297050	49327492	protein_coding	chromosome 10 open reading frame 71	+	30443	2.52999	4.71347	1.47333	3.19919	0.00137815	0.00408346	up
RXFP2	chr13	31739526	31803389	protein_coding	relaxin family peptide receptor 2	+	63864	4.11112	4.39169	1.37272	3.19927	0.00137775	0.00408346	up
GADL1	chr3	30726197	30894661	protein_coding	glutamate decarboxylase like 1	-	168465	5.24558	3.81168	1.19184	3.19816	0.00138307	0.00409423	up
CFTR	chr7	117480025	117668665	protein_coding	CF transmembrane conductance regulator	+	188641	2.52354	4.71084	1.4735	3.19704	0.00138846	0.00410829	up
NLRP2	chr19	54965284	55001138	protein_coding	NLR family pyrin domain containing 2	+	35855	2.52354	4.71084	1.4735	3.19704	0.00138846	0.00410829	up
CLDN7	chr17	7259903	7263213	protein_coding	claudin 7	-	3311	18.1681	1.37136	0.429555	3.19253	0.00141034	0.00416727	up
DMRTA1	chr9	22446824	22455740	protein_coding	DMRT like family A1	+	8917	7.21881	2.55426	0.800489	3.19088	0.00141841	0.00418659	up
LOC100288175	chr1	1059734	1066453	lncRNA	uncharacterized LOC100288175	+	6720	20.3132	1.27485	0.399989	3.18722	0.00143647	0.00423666	up
LOC105373591	chr2	122234225	122247047	lncRNA	uncharacterized LOC105373591	+	12823	12.2741	1.75841	0.552598	3.18208	0.00146219	0.00430524	up
NTMT2	chr1	170145959	170168866	protein_coding	N-terminal Xaa-Pro-Lys N-methyltransferase 2	+	22908	19.5009	1.31299	0.412832	3.18045	0.00147045	0.00432889	up
GRIN1	chr9	137139154	137168756	protein_coding	glutamate ionotropic receptor NMDA type subunit 1	+	29603	23.0892	2.25417	0.709049	3.17915	0.00147708	0.00434642	up
KY	chr3	134599923	134651022	protein_coding	kyphoscoliosis peptidase	-	51100	3.96231	4.33452	1.36357	3.17881	0.00147881	0.00435083	up
CARMAL	chr15	89040998	89084229	lncRNA	coronary artery disease region linked MFGE8 regulatory lncRNA	+	43232	31.9781	1.03483	0.325743	3.17684	0.00148888	0.00437631	up
GPR158	chr10	25175001	25602229	protein_coding	G protein-coupled receptor 158	+	427229	21.7766	1.29892	0.409109	3.17499	0.0014984	0.0044004	up
HCAR1	chr12	122726076	122730844	protein_coding	hydroxycarboxylic acid receptor 1	-	4769	11.4657	1.75385	0.552721	3.17312	0.0015081	0.0044282	up
PPIAP46	chr15	74361552	74362041	transcribed_pseudogene	peptidylprolyl isomerase A pseudogene 46	+	490	3.9572	4.33381	1.36659	3.17125	0.00151782	0.0044547	up
FNDC7	chr1	108712908	108742749	protein_coding	fibronectin type III domain containing 7	+	29842	10.975	1.80199	0.568601	3.16916	0.0015288	0.00448242	up
FCER2	chr19	7688776	7702131	protein_coding	Fc epsilon receptor II	-	13356	2.52139	4.70993	1.487	3.1674	0.00153811	0.00450599	up
ALDH1L1	chr3	126103570	126197945	protein_coding	aldehyde dehydrogenase 1 family member L1	-	94376	18.0271	1.35308	0.427814	3.16278	0.00156269	0.00457028	up
SOCS3	chr17	78356778	78360925	protein_coding	suppressor of cytokine signaling 3	-	4148	23.7561	1.16235	0.367522	3.16268	0.00156325	0.00457059	up
EWSAT1	chr15	69080850	69095824	lncRNA	Ewing sarcoma associated transcript 1	+	14975	3.95748	4.33322	1.37163	3.15918	0.00158216	0.00462025	up
LOC100130673	chr7	32456897	32458494	transcribed_pseudogene	phosphoribosyl pyrophosphate synthetase 2 pseudogene	-	1598	6.39335	2.66262	0.843895	3.15515	0.00160413	0.00468013	up
PLD4	chr14	104924879	104937785	protein_coding	phospholipase D family member 4	+	12907	11.4719	1.75379	0.555979	3.15443	0.00160814	0.00468969	up
GASK1B-AS1	chr4	158170752	158202877	lncRNA	GASK1B antisense RNA 1	+	32126	5.4186	3.22576	1.02359	3.15142	0.00162481	0.00473304	up
ANG	chr14	20684177	20694186	protein_coding	angiogenin	+	10010	22.9332	1.18901	0.377508	3.14964	0.00163472	0.0047571	up
SNAI1	chr20	49982980	49988886	protein_coding	snail family transcriptional repressor 1	+	5907	25.7261	1.09455	0.347966	3.14556	0.00165771	0.00482034	up
AXL	chr19	41219223	41261766	protein_coding	AXL receptor tyrosine kinase	+	42544	5.42578	3.22492	1.02615	3.14273	0.00167381	0.00486363	up
S100A4	chr1	153543621	153545806	protein_coding	S100 calcium binding protein A4	-	2186	19.3231	1.29842	0.413281	3.14174	0.00167949	0.00487704	up
CCDC110	chr4	185445182	185471733	protein_coding	coiled-coil domain containing 110	-	26552	22.1183	1.21921	0.38835	3.13946	0.00169257	0.00491132	up
ICAM4	chr19	10286955	10288520	protein_coding	intercellular adhesion molecule 4 (Landsteiner-Wiener blood group)	+	1566	24.3505	1.21811	0.388174	3.13804	0.00170082	0.00493377	up
SLC16A12	chr10	89430299	89556704	protein_coding	solute carrier family 16 member 12	-	126406	7.5424	2.3685	0.755032	3.13695	0.00170716	0.00494992	up
LOC100128253	chr12	3298514	3366122	lncRNA	uncharacterized LOC100128253	-	67609	17.4841	1.44072	0.460429	3.12908	0.00175356	0.00507143	up
BEAN1	chr16	66427295	66495288	protein_coding	brain expressed associated with NEDD4 1	+	67994	19.8086	1.2877	0.413007	3.11787	0.00182165	0.00525728	up
GSTA3	chr6	52896646	52909698	protein_coding	glutathione S-transferase alpha 3	-	13053	2.36961	4.61937	1.48194	3.11711	0.00182633	0.00526922	up
RAB7B	chr1	205976740	206003395	protein_coding	RAB7B, member RAS oncogene family	-	26656	3.80437	4.27375	1.37117	3.11687	0.00182781	0.0052719	up
DBH-AS1	chr9	133654587	133657408	lncRNA	DBH antisense RNA 1	-	2822	5.91823	2.89887	0.930129	3.11663	0.00182932	0.00527476	up
JPH2	chr20	44106590	44187188	protein_coding	junctophilin 2	-	80599	2.36635	4.61797	1.48204	3.11595	0.00183356	0.00528531	up
LOC105376161	chr9	95764932	95776282	lncRNA	uncharacterized LOC105376161	+	11351	5.75473	2.85404	0.917988	3.10901	0.00187712	0.00539793	up
PCAT6	chr1	202810946	202811913	lncRNA	prostate cancer associated transcript 6	+	968	8.85653	2.02459	0.651451	3.10781	0.00188478	0.0054145	up
RGS22	chr8	99960936	100106049	protein_coding	regulator of G protein signaling 22	-	145114	2.37066	4.61983	1.4865	3.10786	0.00188447	0.0054145	up
PLK5	chr19	1524077	1536046	protein_coding	polo like kinase 5 (inactive)	+	11970	16.8686	1.36728	0.440177	3.10619	0.00189512	0.00544234	up
MFNG	chr22	37469063	37486384	protein_coding	MFNG O-fucosylpeptide 3-beta-N-acetylglucosaminyltransferase	-	17322	10.9614	1.80182	0.580162	3.10572	0.00189814	0.00545019	up
ESPN	chr1	6424776	6461370	protein_coding	espin	+	36595	5.90302	2.89498	0.932714	3.10382	0.0019104	0.00548213	up
LOC105378589	chr1	2013198	2018088	lncRNA	uncharacterized LOC105378589	-	4891	2.37123	4.62009	1.49015	3.10041	0.00193252	0.00554146	up
MMEL1	chr1	2590639	2633016	protein_coding	membrane metalloendopeptidase like 1	-	42378	10.8132	1.77371	0.572176	3.09994	0.00193559	0.0055486	up
LOC105379028	chr5	72095857	72113487	lncRNA	uncharacterized LOC105379028	-	17631	21.7828	1.19235	0.384855	3.09816	0.00194724	0.00558034	up
AREG	chr4	74445136	74455005	protein_coding	amphiregulin	+	9870	10.8163	1.77393	0.572646	3.09777	0.00194983	0.00558408	up
RASSF10	chr11	13009316	13012119	protein_coding	Ras association domain family member 10	+	2804	15.692	1.45819	0.471066	3.0955	0.00196479	0.00562227	up
OR1J2	chr9	122447433	122580427	protein_coding	olfactory receptor family 1 subfamily J member 2	+	132995	3.8137	4.27542	1.38243	3.09269	0.00198353	0.0056687	up
SLC24A2	chr9	19507455	20307892	protein_coding	solute carrier family 24 member 2	-	800438	15.7077	1.45865	0.472142	3.08944	0.00200536	0.00572556	up
STOML3	chr13	38965925	38990831	protein_coding	stomatin like 3	-	24907	3.80494	4.27392	1.38379	3.08857	0.00201124	0.00574149	up
CMKLR2	chr2	206175316	206217912	protein_coding	chemerin chemokine-like receptor 2	-	42597	12.1281	1.62585	0.530112	3.067	0.00216221	0.00613436	up
CD109-AS1	chr6	73693903	73696131	lncRNA	CD109 antisense RNA 1	-	2229	8.36131	2.10894	0.688198	3.06443	0.00218083	0.00618245	up
KCNJ5	chr11	128891356	128921163	protein_coding	potassium inwardly rectifying channel subfamily J member 5	+	29808	7.21838	2.29551	0.751842	3.05318	0.00226431	0.00640211	up
TGFB2	chr1	218345336	218444619	protein_coding	transforming growth factor beta 2	+	99284	21.6256	1.17729	0.385733	3.05208	0.00227263	0.00642373	up
AMDHD1	chr12	95943331	95968720	protein_coding	amidohydrolase domain containing 1	+	25390	17.6806	1.31822	0.431969	3.05165	0.00227588	0.00643198	up
RYR3	chr15	33310967	33866102	protein_coding	ryanodine receptor 3	+	555136	4.76495	3.66348	1.20221	3.04729	0.00230918	0.00652011	up
LINC01522	chr20	47980093	47990117	lncRNA	long intergenic non-protein coding RNA 1522	-	10025	3.64523	4.20828	1.38274	3.04344	0.00233888	0.00659838	up
LINC00574	chr6	169790073	169802873	lncRNA	long intergenic non-protein coding RNA 574	+	12801	11.1494	1.70312	0.561473	3.03331	0.00241888	0.00679116	up
LINC00941	chr12	30795681	30802711	lncRNA	long intergenic non-protein coding RNA 941	+	7031	14.0874	1.50434	0.496398	3.03051	0.00244145	0.00684854	up
ABCC6P1	chr16	18571248	18598289	transcribed_pseudogene	ATP binding cassette subfamily C member 6 pseudogene 1	+	27042	19.1411	1.27913	0.422244	3.02936	0.00245074	0.00687358	up
LOC105378180	chr14	52069236	52074147	lncRNA	uncharacterized LOC105378180	+	4912	2.36578	4.61767	1.52659	3.02483	0.00248776	0.00696422	up
AP1M2	chr19	10572671	10587312	protein_coding	adaptor related protein complex 1 subunit mu 2	-	14642	7.06269	2.25691	0.747545	3.0191	0.00253527	0.00708481	up
LOC124903656	chr16	19091936	19098326	lncRNA	uncharacterized LOC124903656	+	6391	18.8268	1.30896	0.434199	3.01466	0.00257271	0.00717795	up
FIGNL2-DT	chr12	51848223	51852729	lncRNA	FIGNL2 divergent transcript	+	4507	2.20975	4.51896	1.49989	3.01287	0.00258792	0.0072162	up
LOC124905132	chr22	44662000	44668583	lncRNA	uncharacterized LOC124905132	-	6584	2.20975	4.51896	1.49989	3.01287	0.00258792	0.0072162	up
LINC03051	chr3	117877368	117997579	lncRNA	long intergenic non-protein coding RNA 3051	-	120212	5.58429	2.81006	0.932939	3.01205	0.00259488	0.00723455	up
OLFML3	chr1	113979474	113982253	protein_coding	olfactomedin like 3	+	2780	6.89219	2.47689	0.823129	3.00912	0.00262009	0.00729956	up
SOCS3-DT	chr17	78360448	78373909	lncRNA	SOCS3 divergent transcript	+	13462	2.21353	4.52072	1.50623	3.00134	0.00268791	0.00747659	up
LOC100422781	chr6	3231403	3239983	lncRNA	uncharacterized LOC100422781	+	8581	8.2064	2.07378	0.692056	2.99655	0.00273053	0.00758745	up
SFN	chr1	26863149	26864456	protein_coding	stratifin	+	1308	9.19426	1.91732	0.640368	2.99409	0.00275262	0.00763777	up
LOC124904535	chr1	228266341	228276028	lncRNA	uncharacterized LOC124904535	-	9688	15.0871	1.37781	0.460629	2.99114	0.00277939	0.00770872	up
NEUROG2-AS1	chr4	112515379	112546885	lncRNA	NEUROG2 and ZGRF1 antisense RNA 1	+	31507	25.7638	1.09325	0.365725	2.98925	0.00279659	0.00775195	up
FEZF2	chr3	62369681	62373550	protein_coding	FEZ family zinc finger 2	-	3870	3.48575	4.14166	1.38712	2.98579	0.00282849	0.00783358	up
DAW1	chr2	227871631	227924344	protein_coding	dynein assembly factor with WD repeats 1	+	52714	4.61021	3.60983	1.21223	2.97784	0.00290289	0.00802575	up
ABCG5	chr2	43806211	43839231	protein_coding	ATP binding cassette subfamily G member 5	-	33021	9.51525	1.82313	0.612454	2.97676	0.00291308	0.00805046	up
LOC105370913	chr15	78692576	78728914	lncRNA	uncharacterized LOC105370913	-	36339	6.24317	2.62191	0.880834	2.97663	0.00291437	0.00805287	up
LOC124904958	chr20	38430793	38436716	protein_coding	uncharacterized LOC124904958	+	5924	8.38297	-1.93601	0.65056	-2.97592	0.00292112	0.00806804	down
LINC00391	chr13	94698725	94708501	lncRNA	long intergenic non-protein coding RNA 391	-	9777	5.59765	2.80836	0.943878	2.97534	0.00292667	0.00808219	up
FOXA2	chr20	22580998	22585490	protein_coding	forkhead box A2	-	4493	2.21463	4.52127	1.52052	2.9735	0.00294429	0.00812969	up
SERPINA5	chr14	94581426	94593118	protein_coding	serpin family A member 5	+	11693	8.53707	1.95909	0.659307	2.97144	0.0029641	0.00818204	up
LOC124903727	chr16	77289276	77301962	lncRNA	uncharacterized LOC124903727	+	12687	3.48441	4.1405	1.39402	2.97019	0.00297619	0.00821069	up
TMEM51-AS1	chr1	15111815	15152464	lncRNA	TMEM51 antisense RNA 1	-	40650	15.2219	1.39842	0.470896	2.96969	0.002981	0.00822161	up
LRRC46	chr17	47831670	47837719	protein_coding	leucine rich repeat containing 46	+	6050	21.6462	-1.12942	0.380398	-2.96904	0.00298735	0.00823792	down
LOC124903716	chr16	73232781	73239150	lncRNA	uncharacterized LOC124903716	+	6370	2.2162	4.52203	1.52691	2.96156	0.00306082	0.00842121	up
DHDH	chr19	48932795	48944969	protein_coding	dihydrodiol dehydrogenase	+	12175	28.3955	1.00739	0.340272	2.96054	0.00307103	0.00844688	up
DCDC1	chr11	30863603	31369739	protein_coding	doublecortin domain containing 1	-	506137	18.3599	1.25751	0.425588	2.95475	0.00312926	0.00859388	up
RHBG	chr1	156369211	156385219	protein_coding	Rh family B glycoprotein	+	16009	7.06105	2.25887	0.765572	2.95057	0.00317189	0.00869984	up
TPTE2P3	chr13	52488993	52587095	transcribed_pseudogene	TPTE2 pseudogene 3	+	98103	5.09572	3.12449	1.05895	2.95055	0.00317206	0.00869984	up
HAPLN2	chr1	156601504	156625725	protein_coding	hyaluronan and proteoglycan link protein 2	+	24222	11.4466	1.75373	0.594839	2.94825	0.0031958	0.00875622	up
PRR35	chr16	559814	565529	protein_coding	proline rich 35	+	5716	13.756	1.46217	0.497108	2.94135	0.0032679	0.00893592	up
PCK1	chr20	57561110	57568121	protein_coding	phosphoenolpyruvate carboxykinase 1	+	7012	5.43381	2.75886	0.93847	2.93974	0.00328485	0.00897717	up
TSPAN8	chr12	71125096	71157999	protein_coding	tetraspanin 8	-	32904	2.21358	4.5208	1.5382	2.93903	0.00329243	0.00899403	up
OR51B5	chr11	5340318	5505652	protein_coding	olfactory receptor family 51 subfamily B member 5	-	165335	4.44869	3.5537	1.20956	2.93801	0.00330322	0.00901967	up
ADRA2B	chr2	96112876	96116571	protein_coding	adrenoceptor alpha 2B	-	3696	7.39437	2.10193	0.71556	2.93746	0.00330913	0.00903195	up
RHEBL1	chr12	49064676	49069979	protein_coding	RHEB like 1	-	5304	18.2026	1.24053	0.422475	2.93633	0.00332122	0.00906367	up
LOC105377621	chr4	102418602	102502486	lncRNA	uncharacterized LOC105377621	-	83885	9.99995	1.76742	0.602786	2.93208	0.003367	0.00917558	up
CD36	chr7	80602207	80679274	protein_coding	CD36 molecule	+	77068	7.39905	2.102	0.717386	2.93008	0.00338878	0.0092258	up
KCNH1	chr1	210678314	211134148	protein_coding	potassium voltage-gated channel subfamily H member 1	-	455835	4.45945	3.5563	1.214	2.92942	0.00339599	0.00924278	up
KCNK2	chr1	215005542	215237090	protein_coding	potassium two pore domain channel subfamily K member 2	+	231549	4.44759	3.55343	1.21387	2.92735	0.00341859	0.00930034	up
TRIM54	chr2	27282429	27307435	protein_coding	tripartite motif containing 54	+	25007	7.22356	2.29785	0.786161	2.92287	0.0034682	0.00942462	up
CDC20B	chr5	55112971	55173177	protein_coding	cell division cycle 20B	-	60207	8.86181	1.8535	0.63441	2.92161	0.00348222	0.0094587	up
TOX-DT	chr8	59119210	59123478	lncRNA	TOX divergent transcript	+	4269	14.5995	1.47944	0.506386	2.92156	0.00348281	0.00945897	up
L3MBTL2-AS1	chr22	41209122	41217627	lncRNA	L3MBTL2 antisense RNA 1	-	8506	7.01364	-2.18889	0.749282	-2.92132	0.00348555	0.00946508	down
CTNNA3	chr10	65912523	67763594	protein_coding	catenin alpha 3	-	1851072	12.7869	1.51242	0.517926	2.92014	0.0034987	0.00949274	up
LCP2	chr5	170246233	170297777	protein_coding	lymphocyte cytosolic protein 2	-	51545	4.45586	3.55626	1.21783	2.92015	0.00349858	0.00949274	up
OTOGL	chr12	80099537	80380880	protein_coding	otogelin like	+	281344	3.3313	4.07231	1.39543	2.91831	0.00351936	0.00954339	up
LOC124903630	chr16	3674494	3681636	transcribed_pseudogene	uncharacterized LOC124903630	+	7143	22.9488	-1.11227	0.381445	-2.91595	0.00354611	0.0096105	down
FMOD	chr1	203340628	203351122	protein_coding	fibromodulin	-	10495	5.44425	2.762	0.947601	2.91473	0.00356	0.00964597	up
INHBE	chr12	57455307	57458025	protein_coding	inhibin subunit beta E	+	2719	5.4253	2.75802	0.946978	2.91244	0.00358615	0.00971142	up
SLC16A4	chr1	110362857	110391026	protein_coding	solute carrier family 16 member 4	-	28170	20.8526	1.15212	0.395815	2.91074	0.00360571	0.00976102	up
NPY5R	chr4	163343892	163352403	protein_coding	neuropeptide Y receptor Y5	+	8512	11.9568	1.60195	0.551483	2.90481	0.00367475	0.00992833	up
PTH	chr11	13492054	13496181	protein_coding	parathyroid hormone	-	4128	3.32891	4.07078	1.40318	2.90111	0.00371849	0.010024	up
VEPH1	chr3	157259742	157503605	protein_coding	ventricular zone expressed PH domain containing 1	-	243864	4.78448	3.02539	1.04346	2.89939	0.00373889	0.0100733	up
IPCEF1	chr6	154154496	154356803	protein_coding	interaction protein for cytohesin exchange factors 1	-	202308	13.6009	1.43946	0.496532	2.89903	0.00374319	0.0100782	up
LOC124902746	chr11	107859230	107860989	lncRNA	uncharacterized LOC124902746	+	1760	2.05314	4.41266	1.52208	2.8991	0.00374236	0.0100782	up
P4HA3	chr11	74250146	74311640	protein_coding	prolyl 4-hydroxylase subunit alpha 3	-	61495	17.696	1.25016	0.431236	2.89902	0.00374332	0.0100782	up
SPAG6	chr10	22345496	22417610	protein_coding	sperm associated antigen 6	+	72115	4.78993	3.02299	1.04465	2.89379	0.0038062	0.0102338	up
LOC105370672	chr14	101464143	101475790	lncRNA	uncharacterized LOC105370672	-	11648	5.76382	2.48599	0.859203	2.89336	0.00381142	0.0102454	up
OVOL2	chr20	18024152	18059188	protein_coding	ovo like zinc finger 2	-	35037	24.1141	1.04799	0.362214	2.89328	0.00381238	0.0102454	up
LOC124903870	chr1	20339509	20340787	lncRNA	uncharacterized LOC124903870	+	1279	2.05477	4.41348	1.52593	2.89231	0.00382416	0.0102757	up
SP5	chr2	170715337	170718078	protein_coding	Sp5 transcription factor	+	2742	6.42487	2.35747	0.816661	2.88671	0.00389287	0.0104398	up
MS4A15	chr11	60756867	60776733	protein_coding	membrane spanning 4-domains A15	+	19867	4.78572	3.02644	1.04886	2.88544	0.00390868	0.0104793	up
CD274	chr9	5450542	5470554	protein_coding	CD274 molecule	+	20013	12.1461	1.51562	0.526145	2.88061	0.00396911	0.0106265	up
S100B	chr21	46598604	46605082	protein_coding	S100 calcium binding protein B	-	6479	4.29261	3.49753	1.21433	2.88021	0.00397408	0.0106383	up
PRELP	chr1	203475806	203491352	protein_coding	proline and arginine rich end leucine rich repeat protein	+	15547	3.33097	4.07112	1.41399	2.87917	0.00398723	0.010666	up
HAS2	chr8	121612116	121641440	protein_coding	hyaluronan synthase 2	-	29325	15.2581	1.31782	0.457795	2.87864	0.00399399	0.0106812	up
FANK1	chr10	125896564	126009592	protein_coding	fibronectin type III and ankyrin repeat domains 1	+	113029	14.1105	1.41623	0.492754	2.87411	0.00405169	0.0108228	up
NANOS3	chr19	13862036	13880757	protein_coding	nanos C2HC-type zinc finger 3	+	18722	6.74546	2.17534	0.756975	2.87372	0.00405663	0.0108322	up
CD53	chr1	110871210	110899922	protein_coding	CD53 molecule	+	28713	2.05582	4.41402	1.53745	2.87101	0.00409168	0.0109212	up
CXCL14	chr5	135570679	135578991	protein_coding	C-X-C motif chemokine ligand 14	-	8313	2.05372	4.41296	1.53757	2.8701	0.00410347	0.0109496	up
MIR1-1HG	chr20	62550453	62570764	lncRNA	MIR1-1 host gene	+	20312	2.04989	4.41102	1.53898	2.8662	0.0041543	0.0110714	up
CHKA-DT	chr11	68121888	68130515	lncRNA	CHKA divergent transcript	+	8628	4.29351	3.50072	1.22212	2.86446	0.00417721	0.0111248	up
GCNT4	chr5	75016969	75054060	protein_coding	glucosaminyl (N-acetyl) transferase 4	-	37092	7.88451	2.00872	0.701309	2.86425	0.00417999	0.0111306	up
VWA2	chr10	114239254	114294500	protein_coding	von Willebrand factor A domain containing 2	+	55247	4.30031	3.4965	1.22087	2.86394	0.00418412	0.0111371	up
TROAP-AS1	chr12	49292631	49324576	lncRNA	TROAP and PRPH antisense RNA 1	-	31946	22.7888	1.07579	0.375888	2.862	0.00420971	0.0111989	up
IL1R2	chr2	101991960	102028544	protein_coding	interleukin 1 receptor type 2	+	36585	6.25391	2.31335	0.808477	2.86137	0.00421809	0.0112165	up
SLC28A3	chr9	84275457	84368727	protein_coding	solute carrier family 28 member 3	-	93271	2.05587	4.41406	1.54349	2.85979	0.00423928	0.0112651	up
CDH7	chr18	65750252	65890337	protein_coding	cadherin 7	+	140086	9.84389	1.73606	0.607098	2.8596	0.0042417	0.0112684	up
TRIML2	chr4	188091272	188109603	protein_coding	tripartite motif family like 2	-	18332	4.29653	3.49552	1.22317	2.85774	0.00426666	0.0113284	up
C4orf19	chr4	37453255	37593510	protein_coding	chromosome 4 open reading frame 19	+	140256	4.30036	3.49648	1.22359	2.85755	0.00426922	0.0113313	up
TRPM3	chr9	70529060	71446971	protein_coding	transient receptor potential cation channel subfamily M member 3	-	917912	4.29806	3.49892	1.2263	2.85323	0.0043277	0.0114746	up
ELSPBP1	chr19	47994632	48025154	protein_coding	epididymal sperm binding protein 1	+	30523	4.30298	3.50104	1.22858	2.84967	0.00437646	0.0115943	up
GRIN3B	chr19	1000419	1009732	protein_coding	glutamate ionotropic receptor NMDA type subunit 3B	+	9314	10.6629	1.61923	0.568545	2.84802	0.0043992	0.0116449	up
LINC02197	chr5	71321031	71446756	lncRNA	long intergenic non-protein coding RNA 2197	-	125726	3.32656	4.06963	1.42892	2.84805	0.0043988	0.0116449	up
NPR1	chr1	153678688	153693992	protein_coding	natriuretic peptide receptor 1	+	15305	4.62873	2.96961	1.04618	2.83853	0.00453217	0.0119705	up
CDCP1	chr3	45082277	45146482	protein_coding	CUB domain containing protein 1	-	64206	5.11788	2.6625	0.938045	2.83835	0.0045348	0.0119742	up
TMEM229A	chr7	124030921	124033067	protein_coding	transmembrane protein 229A	-	2147	21.8295	1.08728	0.383329	2.83641	0.00456236	0.0120387	up
EDAR	chr2	108894471	108989220	protein_coding	ectodysplasin A receptor	-	94750	2.04559	4.40879	1.55465	2.83587	0.0045701	0.0120574	up
LINC02724	chr11	64449057	64451657	lncRNA	long intergenic non-protein coding RNA 2724	+	2601	10.1767	1.66359	0.587309	2.83256	0.0046177	0.012168	up
LINC01556	chr6	28943784	28944538	lncRNA	long intergenic non-protein coding RNA 1556	+	755	3.17684	3.99947	1.41211	2.83227	0.00462184	0.0121773	up
DPEP1	chr16	89613308	89641540	protein_coding	dipeptidase 1	+	28233	11.3724	-1.58799	0.56076	-2.83185	0.00462792	0.0121883	down
REG4	chr1	119794017	119811460	protein_coding	regenerating family member 4	-	17444	4.62719	2.96998	1.04916	2.83082	0.00464291	0.0122244	up
THPO	chr3	184371935	184379688	protein_coding	thrombopoietin	-	7754	13.1312	1.46239	0.516685	2.83034	0.00464992	0.0122395	up
DLGAP1	chr18	3496032	4455307	protein_coding	DLG associated protein 1	-	959276	4.29198	3.49598	1.23606	2.82833	0.00467911	0.0123079	up
TDRD12	chr19	32719767	32829580	protein_coding	tudor domain containing 12	+	109814	20.5192	1.11924	0.395841	2.82749	0.00469148	0.0123343	up
LINC02268	chr4	174094660	174220398	lncRNA	long intergenic non-protein coding RNA 2268	-	125739	9.68671	1.70892	0.604496	2.82701	0.00469849	0.0123504	up
KIAA1755	chr20	38210503	38260735	protein_coding	KIAA1755	-	50233	3.3303	4.07201	1.44061	2.82658	0.00470475	0.0123635	up
LOC124904069	chr17	79183269	79186282	lncRNA	uncharacterized LOC124904069	+	3014	7.23623	2.06615	0.731651	2.82395	0.00474352	0.0124568	up
TAF1L	chr9	32629454	32635669	protein_coding	TATA-box binding protein associated factor 1 like	-	6216	1.9292	-4.46728	1.58263	-2.8227	0.0047621	0.0124988	down
ZFR2	chr19	3804024	3869038	protein_coding	zinc finger RNA binding protein 2	-	65015	21.9933	1.05132	0.372837	2.81978	0.00480565	0.0125908	up
NEUROD1	chr2	181668295	181680517	protein_coding	neuronal differentiation 1	-	12223	4.13504	3.43952	1.22008	2.8191	0.00481584	0.0126123	up
CTBP1-AS	chr4	1210120	1218591	lncRNA	CTBP1 antisense RNA	+	8472	19.0866	-1.24012	0.440938	-2.81247	0.00491632	0.0128527	down
DOCK2	chr5	169637275	170083382	protein_coding	dedicator of cytokinesis 2	+	446108	3.17804	3.99875	1.42436	2.8074	0.00499431	0.0130406	up
TRAV8-6	chr14	21978679	21979120	V_segment	T cell receptor alpha variable 8-6	+	442	4.14327	3.43865	1.22518	2.80665	0.00500603	0.0130694	up
CCR10	chr17	42678889	42681843	protein_coding	C-C motif chemokine receptor 10	-	2955	12.4581	1.46495	0.522807	2.80209	0.00507721	0.0132391	up
CX3CL1	chr16	57372490	57385044	protein_coding	C-X3-C motif chemokine ligand 1	+	12555	6.73777	2.176	0.776865	2.80099	0.00509453	0.013277	up
PLB1	chr2	28496060	28644142	protein_coding	phospholipase B1	+	148083	4.63255	2.9713	1.0622	2.7973	0.00515314	0.0134188	up
INTS4P2	chr7	65647854	65718688	transcribed_pseudogene	integrator complex subunit 4 pseudogene 2	+	70835	6.59517	2.13434	0.763439	2.79569	0.00517896	0.0134788	up
LOC101929814	chr1	143299518	143308956	lncRNA	uncharacterized LOC101929814	-	9439	6.59211	2.13428	0.763413	2.79571	0.00517858	0.0134788	up
NPY2R	chr4	155173723	155217076	protein_coding	neuropeptide Y receptor Y2	+	43354	4.6172	2.96955	1.06232	2.79534	0.00518455	0.0134878	up
ADRA2A	chr10	111077029	111080907	protein_coding	adrenoceptor alpha 2A	+	3879	5.11615	2.66114	0.952744	2.79314	0.00521998	0.0135727	up
LINC01801	chr19	34816154	34832869	lncRNA	long intergenic non-protein coding RNA 1801	-	16716	22.0003	1.05038	0.376056	2.79315	0.00521967	0.0135727	up
IGF2	chr11	2129117	2149566	protein_coding	insulin like growth factor 2	-	20450	3.1835	4.00065	1.43348	2.79087	0.00525659	0.0136567	up
EPHA1	chr7	143391129	143408856	protein_coding	EPH receptor A1	-	17728	4.13446	3.43942	1.23354	2.78825	0.00529936	0.0137574	up
CFI	chr4	109730982	109801999	protein_coding	complement factor I	-	71018	11.9984	1.49175	0.53572	2.78458	0.00535975	0.0139003	up
LRRC37A11P	chr17	39029906	39053205	transcribed_pseudogene	leucine rich repeat containing 37 member A11, pseudogene	+	23300	15.732	1.30424	0.468774	2.78224	0.00539847	0.0139875	up
PPP1R3C	chr10	91628442	91633071	protein_coding	protein phosphatase 1 regulatory subunit 3C	-	4630	7.22475	2.066	0.742559	2.78227	0.00539797	0.0139875	up
LOC124902912	chr12	31117260	31124627	lncRNA	uncharacterized LOC124902912	+	7368	11.3134	1.60951	0.579647	2.77671	0.00549121	0.0142125	up
LOC105376526	chr11	3473571	3477073	lncRNA	uncharacterized LOC105376526	-	3503	20.2049	1.08745	0.391855	2.77513	0.005518	0.0142761	up
MYH11	chr16	15703135	15857028	protein_coding	myosin heavy chain 11	-	153894	7.57317	1.93178	0.696717	2.77269	0.00555952	0.0143719	up
A2ML1	chr12	8822621	8887459	protein_coding	alpha-2-macroglobulin like 1	+	64839	1.89601	4.29762	1.5505	2.77177	0.00557524	0.0144048	up
ATCAY	chr19	3880685	3928082	protein_coding	ATCAY kinesin light chain interacting caytaxin	+	47398	1.89601	4.29762	1.5505	2.77177	0.00557524	0.0144048	up
FOSL1	chr11	65892049	65900545	protein_coding	FOS like 1, AP-1 transcription factor subunit	-	8497	19.374	1.11583	0.402622	2.77142	0.00558126	0.0144184	up
LOC105370088	chr12	131817258	131819602	lncRNA	uncharacterized LOC105370088	-	2345	1.89491	4.29702	1.55057	2.77125	0.00558417	0.014424	up
PTPRC	chr1	198638713	198757476	protein_coding	protein tyrosine phosphatase receptor type C	+	118764	1.89276	4.29586	1.55072	2.77023	0.00560162	0.0144608	up
B3GALT5	chr21	39612940	39673137	protein_coding	beta-1,3-galactosyltransferase 5	+	60198	3.01674	3.91991	1.41566	2.76896	0.00562353	0.0145139	up
EXOC1L	chr4	55819790	55837489	protein_coding	exocyst complex component 1 like	+	17700	15.9306	1.24814	0.451303	2.76564	0.00568114	0.0146331	up
ADAMTS12	chr5	33523535	33891990	protein_coding	ADAM metallopeptidase with thrombospondin type 1 motif 12	-	368456	4.6406	2.96887	1.07544	2.76062	0.00576917	0.014836	up
LOC124903938	chr17	17039343	17042325	lncRNA	uncharacterized LOC124903938	-	2983	1.89549	4.29734	1.55748	2.75916	0.00579502	0.0148865	up
TRDN	chr6	123216339	123636950	protein_coding	triadin	-	420612	1.89549	4.29734	1.55748	2.75916	0.00579502	0.0148865	up
NCAM2	chr21	20998409	21543329	protein_coding	neural cell adhesion molecule 2	+	544921	16.1062	1.26984	0.460501	2.75751	0.00582426	0.0149517	up
GPNMB	chr7	23246775	23275108	protein_coding	glycoprotein nmb	+	28334	14.9494	1.27636	0.463658	2.7528	0.00590871	0.0151592	up
ST8SIA2	chr15	92393881	92468728	protein_coding	ST8 alpha-N-acetyl-neuraminide alpha-2,8-sialyltransferase 2	+	74848	1.89171	4.29528	1.56128	2.75113	0.00593904	0.015228	up
ME3	chr11	86434930	86672616	protein_coding	malic enzyme 3	-	237687	1.89869	4.2991	1.56364	2.74941	0.0059702	0.0152977	up
GSX2	chr4	54100163	54102498	protein_coding	GS homeobox 2	+	2336	1.89764	4.29852	1.56372	2.74891	0.00597931	0.0153169	up
GFI1B	chr9	132945531	132993434	protein_coding	growth factor independent 1B transcriptional repressor	+	47904	4.95711	2.60707	0.949763	2.74497	0.00605162	0.0154857	up
RASA4	chr7	102579646	102616758	protein_coding	RAS p21 protein activator 4	-	37113	18.0762	1.15681	0.422059	2.74088	0.00612753	0.0156653	up
LINC02387	chr12	31363481	31369301	lncRNA	long intergenic non-protein coding RNA 2387	-	5821	5.44721	2.39165	0.872729	2.74043	0.00613592	0.0156826	up
C1QTNF4	chr11	47589667	47595304	protein_coding	C1q and TNF related 4	-	5638	7.07163	2.02366	0.738702	2.73948	0.00615361	0.0157194	up
PCDHB2	chr5	141094615	141098703	protein_coding	protocadherin beta 2	+	4089	12.497	1.46255	0.534366	2.73699	0.0062005	0.015835	up
GRHL3	chr1	24319357	24364482	protein_coding	grainyhead like transcription factor 3	+	45126	13.308	1.39211	0.508778	2.73619	0.00621553	0.015865	up
ANGPTL4	chr19	8364155	8374370	protein_coding	angiopoietin like 4	+	10216	3.01651	3.9207	1.43407	2.73398	0.00625744	0.0159571	up
LINC02981	chr7	26398569	26540950	lncRNA	long intergenic non-protein coding RNA 2981	+	142382	19.2112	1.09955	0.40231	2.7331	0.00627413	0.0159954	up
SMKR1	chr7	129502531	129512918	protein_coding	small lysine rich protein 1	+	10388	24.5973	1.00166	0.366998	2.72933	0.00634629	0.0161665	up
CFAP92	chr3	128909873	129026748	protein_coding	cilia and flagella associated protein 92 (putative)	-	116876	18.8856	1.12394	0.41212	2.72721	0.0063872	0.0162513	up
ABCB5	chr7	20615667	20757008	protein_coding	ATP binding cassette subfamily B member 5	+	141342	3.97035	3.3763	1.24078	2.72112	0.00650606	0.0165166	up
LINC00449	chr13	99499723	99501063	lncRNA	long intergenic non-protein coding RNA 449	-	1341	20.8645	1.04431	0.383787	2.72107	0.00650703	0.0165168	up
LOC112268460	chr4	1738592	1740826	lncRNA	uncharacterized LOC112268460	-	2235	14.7541	-1.29767	0.47725	-2.71906	0.00654668	0.0165999	down
LINC01404	chr12	110951683	110957818	lncRNA	long intergenic non-protein coding RNA 1404	-	6136	5.10151	2.6615	0.979542	2.71709	0.00658595	0.0166885	up
PADI3	chr1	17249098	17284233	protein_coding	peptidyl arginine deiminase 3	+	35136	4.47214	2.90971	1.07094	2.71697	0.00658826	0.0166922	up
LOC124904752	chr19	51371940	51373913	lncRNA	uncharacterized LOC124904752	+	1974	6.91738	1.9843	0.730475	2.71645	0.00659866	0.0167154	up
TMEM151B	chr6	44270450	44279444	protein_coding	transmembrane protein 151B	+	8995	4.47949	2.91441	1.07332	2.71533	0.00662097	0.016764	up
LOC124905037	chr21	44483001	44484699	lncRNA	uncharacterized LOC124905037	+	1699	6.42804	2.09086	0.770818	2.71252	0.00667729	0.0168967	up
NPAS4	chr11	66409158	66426707	protein_coding	neuronal PAS domain protein 4	+	17550	1.89979	4.29976	1.58597	2.71112	0.00670555	0.0169603	up
TLE6	chr19	2977401	2995179	protein_coding	TLE family member 6, subcortical maternal complex member	+	17779	8.39557	1.75205	0.64635	2.71069	0.00671442	0.0169782	up
ASPG	chr14	104085700	104115582	protein_coding	asparaginase	+	29883	7.06513	2.02501	0.750748	2.69732	0.00698992	0.0176008	up
TNFAIP2	chr14	103121469	103137439	protein_coding	TNF alpha induced protein 2	+	15971	20.5234	1.06403	0.394591	2.69655	0.00700616	0.0176393	up
HHLA3-AS1	chr1	70359559	70360437	lncRNA	HHLA3 antisense RNA 1	-	879	20.8585	1.09569	0.406505	2.69539	0.0070307	0.0176872	up
GSC-DT	chr14	94770642	94773607	lncRNA	GSC divergent transcript	+	2966	5.93779	2.22165	0.825202	2.69225	0.00709725	0.0178406	up
CAPN12	chr19	38730192	38744693	protein_coding	calpain 12	-	14502	11.1711	1.46858	0.546298	2.68824	0.00718302	0.0180303	up
LINC02944	chr10	118241505	118247874	lncRNA	long intergenic non-protein coding RNA 2944	+	6370	2.86014	3.83791	1.42828	2.68709	0.00720783	0.0180878	up
LINC02458	chr12	89011126	89019692	lncRNA	long intergenic non-protein coding RNA 2458	-	8567	2.85392	3.83652	1.43019	2.68252	0.00730706	0.0183177	up
LINC02520	chr6	37507348	37536280	lncRNA	long intergenic non-protein coding RNA 2520	+	28933	2.86176	3.83852	1.43224	2.68007	0.00736059	0.0184447	up
NPY6R	chr5	137801193	137810751	transcribed_pseudogene	neuropeptide Y receptor Y6 (pseudogene)	+	9559	3.82174	3.3138	1.23651	2.67997	0.00736294	0.0184457	up
SSTR5	chr16	1072747	1081454	protein_coding	somatostatin receptor 5	+	8708	2.85583	3.83632	1.43231	2.67842	0.00739702	0.0185215	up
INKA1	chr3	49803261	49805030	protein_coding	inka box actin regulator 1	+	1770	11.9696	1.4881	0.555635	2.67821	0.00740177	0.0185285	up
ADGRD2	chr9	124450451	124478580	protein_coding	adhesion G protein-coupled receptor D2	+	28130	5.29252	2.34018	0.874404	2.67631	0.0074437	0.0186198	up
APELA	chr4	164877178	164899007	protein_coding	apelin receptor early endogenous ligand	+	21830	2.86378	3.83891	1.43517	2.67489	0.00747542	0.0186788	up
BIN2	chr12	51281038	51324668	protein_coding	bridging integrator 2	-	43631	2.86124	3.83833	1.43524	2.67434	0.0074877	0.0187029	up
SFRP5	chr10	97766751	97771999	protein_coding	secreted frizzled related protein 5	-	5249	8.87295	1.69416	0.633518	2.67421	0.00749045	0.0187066	up
ALOX15	chr17	4630919	4641678	protein_coding	arachidonate 15-lipoxygenase	-	10760	2.86005	3.83753	1.43521	2.67384	0.00749871	0.0187224	up
H2BC4	chr6	26113170	26123926	protein_coding	H2B clustered histone 4	-	10757	17.9257	-1.106	0.413634	-2.67385	0.00749852	0.0187224	down
PRSS8	chr16	31131433	31135727	protein_coding	serine protease 8	-	4295	4.80652	2.55494	0.959299	2.66334	0.00773682	0.0192593	up
LOC653513	chr1	149197559	149201146	transcribed_pseudogene	phosphodiesterase 4D interacting protein-like	-	3588	6.42539	2.09326	0.786365	2.66194	0.00776914	0.0193323	up
LOC107985541	chr22	29453784	29478126	lncRNA	uncharacterized LOC107985541	-	24343	4.80688	2.55363	0.962014	2.65447	0.0079434	0.0197404	up
ARL11	chr13	49628507	49633872	protein_coding	ADP ribosylation factor like GTPase 11	+	5366	7.74997	1.78014	0.670852	2.65355	0.00796495	0.0197785	up
STMN2	chr8	79611117	79666158	protein_coding	stathmin 2	+	55042	3.81479	3.31277	1.24908	2.65217	0.00799771	0.0198496	up
CCDC148	chr2	158171073	158456753	protein_coding	coiled-coil domain containing 148	-	285681	6.76804	1.94279	0.73394	2.64706	0.00811947	0.0201181	up
ZFHX4-AS1	chr8	76610879	76683275	lncRNA	ZFHX4 antisense RNA 1	-	72397	17.7761	-1.1484	0.433948	-2.6464	0.00813538	0.0201523	down
IQUB	chr7	123452193	123534595	protein_coding	IQ motif and ubiquitin domain containing	-	82403	16.7691	1.13657	0.429857	2.64406	0.00819192	0.0202845	up
MMP28	chr17	35756249	35795641	protein_coding	matrix metallopeptidase 28	-	39393	2.86363	3.8402	1.45265	2.64358	0.00820338	0.0203103	up
TMEM271	chr4	573880	576295	protein_coding	transmembrane protein 271	-	2416	15.4463	1.18712	0.449419	2.64145	0.00825511	0.0204252	up
LOC124907735	chr2	11739936	11745459	lncRNA	uncharacterized LOC124907735	-	5524	1.734	4.16972	1.58229	2.63525	0.00840749	0.0207674	up
ASIC4	chr2	219507093	219538772	protein_coding	acid sensing ion channel subunit family member 4	+	31680	10.333	1.56331	0.593928	2.63216	0.00848441	0.0209359	up
LMO3	chr12	16548372	16610174	protein_coding	LIM domain only 3	-	61803	4.80774	2.55195	0.97145	2.62695	0.00861538	0.0212291	up
HBA1	chr16	176680	177522	protein_coding	hemoglobin subunit alpha 1	+	843	1.73668	4.1713	1.58872	2.62557	0.00865046	0.0213074	up
LOC105377864	chr6	77403604	77486139	protein_coding	uncharacterized LOC105377864	+	82536	1.73668	4.1713	1.58872	2.62557	0.00865046	0.0213074	up
DYNC1LI2-DT	chr16	66751752	66754743	lncRNA	DYNC1LI2 divergent transcript	+	2992	7.50643	-1.90615	0.726011	-2.62551	0.00865194	0.0213083	down
IL6-AS1	chr7	22725395	22727620	lncRNA	IL6 antisense RNA 1	-	2226	1.73453	4.17002	1.58892	2.62444	0.00867924	0.0213728	up
LGALS9	chr17	27631188	27649560	protein_coding	galectin 9	+	18373	19.5356	1.07562	0.410157	2.62247	0.00872957	0.0214802	up
TPTE2P6	chr13	24580208	24597676	transcribed_pseudogene	TPTE2 pseudogene 6	+	17469	9.21715	1.61535	0.61635	2.62084	0.00877133	0.0215691	up
LOC105373583	chr2	120235196	120246109	lncRNA	uncharacterized LOC105373583	-	10914	6.43042	2.08964	0.79767	2.61968	0.00880124	0.0216316	up
DNAI1	chr9	34458805	34520984	protein_coding	dynein axonemal intermediate chain 1	+	62180	11.9928	1.38698	0.530463	2.61465	0.00893182	0.0219133	up
OR2I1P	chr6	29550407	29557773	protein_coding	olfactory receptor family 2 subfamily I member 1 pseudogene	+	7367	1.73673	4.17134	1.5959	2.61379	0.00895451	0.0219573	up
STEAP1B-AS1	chr7	22563337	22573998	lncRNA	STEAP1B antisense RNA 1	+	10662	1.73673	4.17134	1.5959	2.61379	0.00895451	0.0219573	up
DNAAF11	chr8	132570416	132702913	protein_coding	dynein axonemal assembly factor 11	-	132498	11.8344	1.36148	0.521384	2.61127	0.00902061	0.0220888	up
TLR10	chr4	38772238	38782990	protein_coding	toll like receptor 10	-	10753	3.66594	3.24493	1.24295	2.61068	0.00903627	0.0221201	up
PPP1R3G	chr6	5085341	5089487	protein_coding	protein phosphatase 1 regulatory subunit 3G	+	4147	14.6162	1.23312	0.472582	2.60932	0.00907231	0.0221985	up
FLJ30679	chr16	86555320	86557299	lncRNA	uncharacterized protein FLJ30679	+	1980	9.06028	1.57957	0.606538	2.60424	0.00920781	0.0225014	up
LOC107985219	chr1	160284365	160292826	lncRNA	uncharacterized LOC107985219	+	8462	4.4739	-2.60357	1.00026	-2.60289	0.00924421	0.0225874	down
MYL1	chr2	210290150	210315174	protein_coding	myosin light chain 1	-	25025	3.66078	3.24579	1.2474	2.60205	0.00926695	0.0226401	up
CYP4F35P	chr18	14337423	14342524	transcribed_pseudogene	cytochrome P450 family 4 subfamily F member 35, pseudogene	+	5102	15.1067	1.21912	0.46857	2.60179	0.00927391	0.0226542	up
HAPLN1	chr5	83637805	83720855	protein_coding	hyaluronan and proteoglycan link protein 1	-	83051	3.66216	3.24379	1.2469	2.60149	0.00928208	0.0226684	up
ALDH1L1-AS2	chr3	126180065	126210169	lncRNA	ALDH1L1 antisense RNA 2	+	30105	2.70109	3.75097	1.44395	2.59771	0.00938468	0.0228841	up
SLC5A12	chr11	26667020	26723389	protein_coding	solute carrier family 5 member 12	-	56370	14.1326	1.24659	0.480073	2.59667	0.00941332	0.0229452	up
TCHH	chr1	152106317	152115444	protein_coding	trichohyalin	-	9128	9.71708	1.57107	0.605153	2.59615	0.0094276	0.0229742	up
PTH2	chr19	49422419	49423441	protein_coding	parathyroid hormone 2	-	1023	2.70397	3.75077	1.4455	2.59479	0.00946483	0.023059	up
TAPT1-AS1	chr4	16226663	16258187	lncRNA	TAPT1 antisense RNA 1 (head to head)	+	31525	21.967	1.0539	0.406571	2.59216	0.0095376	0.0232216	up
WNT4	chr1	22117313	22143097	protein_coding	Wnt family member 4	-	25785	8.22998	1.71388	0.661356	2.59146	0.00955692	0.0232598	up
LOC124904569	chr1	243360792	243364164	lncRNA	uncharacterized LOC124904569	+	3373	1.74098	4.17391	1.61159	2.58994	0.00959925	0.0233421	up
PLD5	chr1	242082986	242530546	protein_coding	phospholipase D family member 5	-	447561	3.66441	3.25033	1.25637	2.58709	0.00967903	0.0235123	up
LOC105372639	chr20	48025219	48066291	lncRNA	uncharacterized LOC105372639	+	41073	1.73295	4.16904	1.61258	2.58533	0.0097287	0.0236002	up
SLC5A8	chr12	101155493	101210238	protein_coding	solute carrier family 5 member 8	-	54746	1.73295	4.16904	1.61258	2.58533	0.0097287	0.0236002	up
SCRT1	chr8	144330565	144336482	protein_coding	scratch family transcriptional repressor 1	-	5918	2.69967	3.74907	1.4511	2.58361	0.00977721	0.0236999	up
ACKR3	chr2	236537122	236582354	protein_coding	atypical chemokine receptor 3	+	45233	4.6394	2.49794	0.968003	2.58051	0.0098655	0.0238898	up
LINC00987	chr12	9240073	9262901	lncRNA	long intergenic non-protein coding RNA 987	+	22829	8.89762	1.6971	0.658219	2.57833	0.00992805	0.0240231	up
LOC124901808	chr7	186258	190118	lncRNA	uncharacterized LOC124901808	-	3861	9.05854	1.58086	0.613375	2.57732	0.00995694	0.0240869	up
CFAP65	chr2	219002846	219041551	protein_coding	cilia and flagella associated protein 65	-	38706	8.86967	1.69583	0.65832	2.57599	0.00999522	0.0241643	up
LOC107986538	chr6	41437626	41444410	lncRNA	uncharacterized LOC107986538	-	6785	10.5388	1.46707	0.570289	2.57251	0.0100965	0.0243908	up
CNGA4	chr11	6234793	6244976	protein_coding	cyclic nucleotide gated channel subunit alpha 4	+	10184	5.62912	2.12827	0.827939	2.57056	0.0101534	0.024519	up
IFI44	chr1	78649789	78664078	protein_coding	interferon induced protein 44	+	14290	1.7362	4.17102	1.62452	2.56755	0.0102421	0.0247084	up
LOC105369306	chr21	36104881	36109690	lncRNA	uncharacterized LOC105369306	+	4810	1.7362	4.17102	1.62452	2.56755	0.0102421	0.0247084	up
SLC7A7	chr14	22773222	22819791	protein_coding	solute carrier family 7 member 7	-	46570	15.1323	1.21856	0.47501	2.56533	0.0103076	0.0248508	up
B3GNT7	chr2	231395710	231401164	protein_coding	UDP-GlcNAc:betaGal beta-1,3-N-acetylglucosaminyltransferase 7	+	5455	14.8038	1.17568	0.459806	2.55689	0.0105612	0.0253951	up
TEKT4	chr2	94871430	94876823	protein_coding	tektin 4	+	5394	5.12429	2.28707	0.895755	2.55324	0.0106727	0.0256473	up
LOC124904006	chr17	42992785	42999933	lncRNA	uncharacterized LOC124904006	-	7149	103.917	-1.10797	0.435627	-2.54339	0.0109783	0.0263421	down
GPR149	chr3	154334943	154430190	protein_coding	G protein-coupled receptor 149	-	95248	5.14266	2.28494	0.900876	2.53636	0.0112013	0.0268202	up
LOC105370295	chr13	24539138	24541720	lncRNA	uncharacterized LOC105370295	-	2583	5.6329	2.12643	0.838729	2.5353	0.011235	0.0268943	up
LOC124901185	chr5	148083931	148093924	lncRNA	uncharacterized LOC124901185	-	9994	18.7268	1.04813	0.414063	2.53134	0.0113629	0.0271802	up
AVIL	chr12	57797380	57818734	protein_coding	advillin	-	21355	6.10846	2.00285	0.792312	2.52786	0.0114761	0.0274372	up
INSYN1-AS1	chr15	73768086	73769802	lncRNA	INSYN1 antisense RNA 1	+	1717	5.63784	2.12746	0.84201	2.52665	0.0115157	0.0275149	up
LOC107986904	chr8	122699833	122734018	lncRNA	uncharacterized LOC107986904	-	34186	3.48789	5.17697	2.04952	2.52594	0.011539	0.0275672	up
LOC124901971	chr8	85885893	85908616	lncRNA	uncharacterized LOC124901971	+	22724	8.9085	1.54644	0.612503	2.52479	0.0115767	0.0276502	up
LOC105371710	chr17	28204774	28227840	lncRNA	uncharacterized LOC105371710	-	23067	2.70598	3.75307	1.48828	2.52175	0.0116773	0.0278698	up
ATP2C2	chr16	84368538	84464187	protein_coding	ATPase secretory pathway Ca2+ transporting 2	+	95650	3.49987	3.17441	1.262	2.51537	0.0118906	0.0283541	up
NGF	chr1	115285917	115338249	protein_coding	nerve growth factor	-	52333	5.12952	2.28355	0.908837	2.51261	0.0119843	0.0285492	up
LOC124901288	chr6	26331818	26340285	lncRNA	uncharacterized LOC124901288	+	8468	2.54411	3.65688	1.45555	2.51236	0.0119925	0.0285653	up
RIMBP2	chr12	130396133	130716299	protein_coding	RIMS binding protein 2	-	320167	3.51245	3.17477	1.26377	2.51214	0.0120001	0.0285799	up
LOC124902114	chr9	5457431	5629727	lncRNA	uncharacterized LOC124902114	-	172297	10.0162	-1.45265	0.578573	-2.51075	0.0120476	0.0286859	down
LOC105375800	chr8	143758492	143760508	transcribed_pseudogene	SREBF pathway regulator in golgi 1 pseudogene	-	2017	4.9784	2.23143	0.88901	2.51001	0.0120727	0.0287384	up
NPR3	chr5	32690872	32791720	protein_coding	natriuretic peptide receptor 3	+	100849	4.00165	2.72899	1.08767	2.50902	0.0121065	0.0288155	up
PCDHA11	chr5	140867513	141012347	protein_coding	protocadherin alpha 11	+	144835	2.54477	3.65755	1.45797	2.50866	0.0121189	0.0288413	up
PCED1B	chr12	47079621	47236660	protein_coding	PC-esterase domain containing 1B	+	157040	3.5067	3.18017	1.26783	2.50835	0.0121295	0.0288593	up
SHH	chr7	155799980	155812463	protein_coding	sonic hedgehog signaling molecule	-	12484	2.54123	3.65709	1.45817	2.50799	0.0121418	0.0288816	up
GRIA2	chr4	157220120	157366075	protein_coding	glutamate ionotropic receptor AMPA type subunit 2	+	145956	3.99351	2.7267	1.0876	2.50709	0.012173	0.0289486	up
CFAP74	chr1	1921957	2003786	protein_coding	cilia and flagella associated protein 74	-	81830	7.2421	1.85322	0.739295	2.50674	0.0121851	0.0289701	up
ARHGAP25	chr2	68710544	68826833	protein_coding	Rho GTPase activating protein 25	+	116290	10.3665	1.43726	0.573486	2.50618	0.0122044	0.0290018	up
IRF6	chr1	209785617	209806142	protein_coding	interferon regulatory factor 6	-	20526	15.8028	1.15352	0.460774	2.50343	0.0122995	0.0292024	up
CCL2	chr17	34255285	34257203	protein_coding	C-C motif chemokine ligand 2	+	1919	1.57955	4.03428	1.61274	2.50151	0.0123664	0.0293431	up
TRIM43	chr2	95592001	95599778	protein_coding	tripartite motif containing 43	+	7778	1.57902	4.03394	1.6128	2.50121	0.012377	0.0293638	up
HPSE2	chr10	98457077	99315951	protein_coding	heparanase 2 (inactive)	-	858875	1.57739	4.03289	1.61298	2.50027	0.01241	0.0294138	up
IFI35	chr17	43006784	43014456	protein_coding	interferon induced protein 35	+	7673	15.2162	-1.14735	0.458924	-2.50009	0.0124163	0.0294251	down
PF4	chr4	73980811	73982124	protein_coding	platelet factor 4	-	1314	4.48868	2.43636	0.975101	2.49857	0.0124695	0.0295431	up
LINC01948	chr5	56457795	56481769	lncRNA	long intergenic non-protein coding RNA 1948	-	23975	2.54301	3.65641	1.46365	2.49815	0.0124844	0.029571	up
MIR1244-2	chr5	118974586	118974670	miRNA	microRNA 1244-2	+	85	15.0371	-1.12201	0.449141	-2.49812	0.0124855	0.029571	down
LOC105378008	chr6	132876600	132958185	lncRNA	uncharacterized LOC105378008	+	81586	4.48218	2.43846	0.97652	2.4971	0.0125214	0.0296341	up
CPA3	chr3	148865296	148897203	protein_coding	carboxypeptidase A3	+	31908	2.54841	3.65869	1.46535	2.4968	0.0125318	0.0296477	up
PLPP2	chr19	281043	291403	protein_coding	phospholipid phosphatase 2	-	10361	2.54841	3.65869	1.46535	2.4968	0.0125318	0.0296477	up
USP32P2	chr17	18511262	18521252	transcribed_pseudogene	ubiquitin specific peptidase 32 pseudogene 2	-	9991	3.99356	2.7267	1.09212	2.49669	0.0125358	0.0296536	up
ADGRE1	chr19	6887579	6940450	protein_coding	adhesion G protein-coupled receptor E1	+	52872	12.104	3.3898	1.35818	2.49583	0.0125662	0.029718	up
MYPN	chr10	68087897	68212017	protein_coding	myopalladin	+	124121	4.47796	2.43813	0.977048	2.4954	0.0125814	0.0297503	up
LOC124903301	chr14	35445302	35447868	lncRNA	uncharacterized LOC124903301	-	2567	2.53641	3.65506	1.4658	2.49356	0.0126468	0.029883	up
LOC107986749	chr7	138161773	138165485	lncRNA	uncharacterized LOC107986749	+	3713	4.49231	2.4399	0.978729	2.49292	0.0126697	0.0299257	up
RBPJL	chr20	45306840	45317824	protein_coding	recombination signal binding protein for immunoglobulin kappa J region like	+	10985	1.57687	4.03254	1.62004	2.48917	0.0128042	0.0301992	up
LOC107986909	chr8	6805006	6807902	lncRNA	uncharacterized LOC107986909	-	2897	5.46219	2.07518	0.835073	2.48503	0.0129542	0.0305267	up
HES5	chr1	2528745	2530263	protein_coding	hes family bHLH transcription factor 5	-	1519	18.9304	1.00576	0.40503	2.48318	0.0130214	0.0306664	up
PIK3R5-DT	chr17	8965847	8976986	lncRNA	PIK3R5 divergent transcript	+	11140	6.45469	1.85535	0.747204	2.48306	0.013026	0.0306734	up
LOC124904509	chr1	214259038	214281036	lncRNA	uncharacterized LOC124904509	-	21999	8.58821	1.62584	0.655183	2.4815	0.0130829	0.0307961	up
WFDC21P	chr17	60083566	60088467	transcribed_pseudogene	WAP four-disulfide core domain 21, pseudogene	-	4902	9.23812	1.47292	0.593912	2.48002	0.0131374	0.0309092	up
LOC124904261	chr18	22452695	22458288	lncRNA	uncharacterized LOC124904261	+	5594	9.40139	1.50578	0.607243	2.4797	0.0131494	0.0309298	up
[truncated: 124 more rows]

## Sheet: Table S2
id	rank	motif	consensus	pval	logpval	qval	no. target sequence with motif	% target sequence with motif	no. bg. sequence with motif	% bg. sequence with motif
H3K27acLoss	1	Hoxa11(Homeobox)/ChickenMSG-Hoxa11.Flag-ChIP-Seq(GSE86088)/Homer	TTTTATGGCM	0.001	-7.945	0.1673	60	0.1227	7543.7	0.0779
H3K27acLoss	2	Hoxc9(Homeobox)/Ainv15-Hoxc9-ChIP-Seq(GSE21812)/Homer	GGCCATAAATCA	0.001	-7.371	0.1673	15	0.0307	1105.4	0.0114
H3K27acLoss	3	Zac1(Zf)/Neuro2A-Plagl1-ChIP-Seq(GSE75942)/Homer	HAWGRGGCCM	0.001	-7.202	0.1673	230	0.4703	38612.9	0.3985
H3K27acLoss	4	FOXA1(Forkhead)/LNCAP-FOXA1-ChIP-Seq(GSE27824)/Homer	WAAGTAAACA	0.001	-7.073	0.1673	31	0.0634	3299.1	0.034
H3K27acLoss	5	Hoxa13(Homeobox)/ChickenMSG-Hoxa13.Flag-ChIP-Seq(GSE86088)/Homer	CYHATAAAAN	0.001	-6.908	0.1673	61	0.1247	8034.6	0.0829
H3K27acLoss	6	Hoxc13(Homeobox)/EB-Hoxc13.HA-ChIP-Seq(GSE142377)/Homer	TTTTATKRGN	0.01	-4.999	0.2153	35	0.0716	4432	0.0457
H3K27acLoss	7	MRE(NR)/Neuro2A-NR3C2-ChIPnexus(GSE115417)/Homer	GGAACAGAVTGTCCT	0.01	-5.116	0.2153	67	0.137	9736.5	0.1005
H3K27acLoss	8	NFkB-p50,p52(RHD)/Monocyte-p50-ChIP-Chip(Schreiber_et_al.)/Homer	GGGGGAATCCCC	0.01	-5.137	0.2153	21	0.0429	2247.9	0.0232
H3K27acLoss	9	p73(p53)/Trachea-p73-ChIP-Seq(PRJNA310161)/Homer	NRRRCAWGTCCDGRCATGYY	0.01	-5.208	0.2153	5	0.0102	219.6	0.0023
H3K27acLoss	10	RAR:RXR(NR),DR5/ES-RAR-ChIP-Seq(GSE56893)/Homer	RGGTCADNNAGAGGTCAV	0.01	-5.303	0.2136	5	0.0102	214.2	0.0022
H3K27acLoss	11	Oct4:Sox17(POU,Homeobox,HMG)/F9-Sox17-ChIP-Seq(GSE44553)/Homer	CCATTGTATGCAAAT	0.01	-5.615	0.191	6	0.0123	287	0.003
H3K27acLoss	12	Hoxd13(Homeobox)/ChickenMSG-Hoxd13.Flag-ChIP-Seq(GSE86088)/Homer	NCYAATAAAA	0.01	-4.891	0.2218	36	0.0736	4626.7	0.0477
H3K27acLoss	13	FOXA1(Forkhead)/MCF7-FOXA1-ChIP-Seq(GSE26831)/Homer	WAAGTAAACA	0.01	-5.979	0.1673	25	0.0511	2654.4	0.0274
H3K27acLoss	14	Foxa3(Forkhead)/Liver-Foxa3-ChIP-Seq(GSE77670)/Homer	BSNTGTTTACWYWGN	0.01	-6.239	0.1673	11	0.0225	759.2	0.0078
H3K27acLoss	15	Hoxd11(Homeobox)/ChickenMSG-Hoxd11.Flag-ChIP-Seq(GSE86088)/Homer	VGCCATAAAA	0.01	-6.631	0.1673	64	0.1309	8626.6	0.089
H3K27acLoss	16	CDX4(Homeobox)/ZebrafishEmbryos-Cdx4.Myc-ChIP-Seq(GSE48254)/Homer	NGYCATAAAWCH	0.01	-5.522	0.191	22	0.045	2313.5	0.0239
H3K27acLoss	17	Hoxc10(Homeobox)/EB-Hoxc10.iFlag-ChIP-Seq(GSE142377)/Homer	CMATAAATCA	0.01	-4.704	0.2516	25	0.0511	2946.7	0.0304
H3K27acGain	1	CTCF(Zf)/CD4+-CTCF-ChIP-Seq(Barski_et_al.)/Homer	AYAGTGCCMYCTRGTGGCCA	1e-27	-64.24	0	108	0.0301	803.6	0.0084
H3K27acGain	2	Jun-AP1(bZIP)/K562-cJun-ChIP-Seq(GSE31477)/Homer	GATGASTCATCN	1e-21	-49.32	0	147	0.041	1598	0.0166
H3K27acGain	3	Fosl2(bZIP)/3T3L1-Fosl2-ChIP-Seq(GSE56872)/Homer	NATGASTCABNN	1e-19	-44.26	0	175	0.0488	2187.8	0.0228
H3K27acGain	4	BORIS(Zf)/K562-CTCFL-ChIP-Seq(GSE32465)/Homer	CNNBRGCGCCCCCTGSTGGC	1e-18	-43.19	0	138	0.0385	1558.2	0.0162
H3K27acGain	5	Six1(Homeobox)/Myoblast-Six1-ChIP-Chip(GSE20150)/Homer	GKVTCADRTTWC	1e-17	-40.19	0	142	0.0396	1687.1	0.0176
H3K27acGain	6	JunB(bZIP)/DendriticCells-Junb-ChIP-Seq(GSE36099)/Homer	RATGASTCAT	1e-16	-36.95	0	245	0.0683	3739.8	0.0389
H3K27acGain	7	Fos(bZIP)/TSC-Fos-ChIP-Seq(GSE110950)/Homer	NDATGASTCAYN	1e-15	-34.9	0	250	0.0697	3912.3	0.0407
H3K27acGain	8	Sp5(Zf)/mES-Sp5.Flag-ChIP-Seq(GSE72989)/Homer	RGKGGGCGGAGC	1e-15	-34.65	0	626	0.1746	12303.1	0.128
H3K27acGain	9	Fra2(bZIP)/Striatum-Fra2-ChIP-Seq(GSE43429)/Homer	GGATGACTCATC	1e-14	-34.16	0	216	0.0603	3247.5	0.0338
H3K27acGain	10	KLF14(Zf)/HEK293-KLF14.GFP-ChIP-Seq(GSE58341)/Homer	RGKGGGCGKGGC	1e-14	-33.41	0	1053	0.2937	22757	0.2368
H3K27acGain	11	Six4(Homeobox)/MCF7-SIX4-ChIP-Seq(Encode)/Homer	TGWAAYCTGABACCB	1e-13	-30.56	0	48	0.0134	347.4	0.0036
H3K27acGain	12	Atf3(bZIP)/GBM-ATF3-ChIP-Seq(GSE33912)/Homer	DATGASTCATHN	1e-13	-30.66	0	276	0.077	4620.1	0.0481
H3K27acGain	13	Sp2(Zf)/HEK293-Sp2.eGFP-ChIP-Seq(Encode)/Homer	YGGCCCCGCCCC	1e-13	-30.26	0	863	0.2407	18317.5	0.1906
H3K27acGain	14	BATF(bZIP)/Th17-BATF-ChIP-Seq(GSE39756)/Homer	DATGASTCAT	1e-13	-31.51	0	271	0.0756	4479.2	0.0466
H3K27acGain	15	AP-1(bZIP)/ThioMac-PU.1-ChIP-Seq(GSE21512)/Homer	VTGACTCATC	1e-13	-31.91	0	312	0.087	5338	0.0556
H3K27acGain	16	Fra1(bZIP)/BT549-Fra1-ChIP-Seq(GSE46166)/Homer	NNATGASTCATH	1e-13	-30.85	0	230	0.0642	3647.6	0.038
H3K27acGain	17	KLF1(Zf)/HUDEP2-KLF1-CutnRun(GSE136251)/Homer	VDGGGYGGGGCY	1e-12	-29.72	0	598	0.1668	11967	0.1245
H3K27acGain	18	NFE2L2(bZIP)/HepG2-NFE2L2-ChIP-Seq(Encode)/Homer	AWWWTGCTGAGTCAT	1e-10	-23.52	0	36	0.01	259.2	0.0027
H3K27acGain	19	Bach2(bZIP)/OCILy7-Bach2-ChIP-Seq(GSE44420)/Homer	TGCTGAGTCA	1e-10	-24.09	0	102	0.0285	1330.2	0.0138
H3K27acGain	20	Maz(Zf)/HepG2-Maz-ChIP-Seq(GSE31477)/Homer	GGGGGGGG	1e-10	-23.59	0	683	0.1905	14471.7	0.1506
H3K27acGain	21	KLF6(Zf)/PDAC-KLF6-ChIP-Seq(GSE64557)/Homer	MKGGGYGTGGCC	1e-10	-25	0	618	0.1724	12786.7	0.1331
H3K27acGain	22	KLF5(Zf)/LoVo-KLF5-ChIP-Seq(GSE49402)/Homer	DGGGYGKGGC	1e-10	-25.12	0	789	0.2201	16932	0.1762
H3K27acGain	23	Klf15(Zf)/Liver-Klf15-ChIP-Seq(GSE166083)/Homer	RGGGGGCGGGGC	1e-10	-24.88	0	649	0.181	13541.9	0.1409
H3K27acGain	24	c-Jun-CRE(bZIP)/K562-cJun-ChIP-Seq(GSE31477)/Homer	ATGACGTCATCY	1e-09	-22.87	0	190	0.053	3121.4	0.0325
H3K27acGain	25	NF-E2(bZIP)/K562-NFE2-ChIP-Seq(GSE31477)/Homer	GATGACTCAGCA	1e-09	-22.81	0	44	0.0123	377.3	0.0039
H3K27acGain	26	Six2(Homeobox)/NephronProgenitor-Six2-ChIP-Seq(GSE39837)/Homer	GWAAYHTGAKMC	1e-09	-22.73	0	387	0.1079	7501	0.0781
H3K27acGain	27	Zic3(Zf)/mES-Zic3-ChIP-Seq(GSE37889)/Homer	GGCCYCCTGCTGDGH	1e-09	-21.95	0	328	0.0915	6197.2	0.0645
H3K27acGain	28	Usf2(bHLH)/C2C12-Usf2-ChIP-Seq(GSE36030)/Homer	GTCACGTGGT	1e-09	-21.42	0	201	0.0561	3415.2	0.0355
H3K27acGain	29	Klf9(Zf)/GBM-Klf9-ChIP-Seq(GSE62211)/Homer	GCCACRCCCACY	1e-08	-19.77	0	244	0.0681	4432.3	0.0461
H3K27acGain	30	Klf4(Zf)/mES-Klf4-ChIP-Seq(GSE11431)/Homer	GCCACACCCA	1e-08	-18.91	0	298	0.0831	5696.6	0.0593
H3K27acGain	31	MITF(bHLH)/MastCells-MITF-ChIP-Seq(GSE48085)/Homer	RTCATGTGAC	1e-08	-20	0	385	0.1074	7633.3	0.0794
H3K27acGain	32	EBF(EBF)/proBcell-EBF-ChIP-Seq(GSE21978)/Homer	DGTCCCYRGGGA	1e-08	-20.21	0	134	0.0374	2065.2	0.0215
H3K27acGain	33	Bach1(bZIP)/K562-Bach1-ChIP-Seq(GSE31477)/Homer	AWWNTGCTGAGTCAT	1e-08	-20.41	0	38	0.0106	321	0.0033
H3K27acGain	34	Nrf2(bZIP)/Lymphoblast-Nrf2-ChIP-Seq(GSE37589)/Homer	HTGCTGAGTCAT	1e-08	-20.16	0	38	0.0106	324	0.0034
H3K27acGain	35	KLF3(Zf)/MEF-Klf3-ChIP-Seq(GSE44748)/Homer	NRGCCCCRCCCHBNN	1e-07	-17.69	0	340	0.0948	6744.2	0.0702
H3K27acGain	36	COUP-TFII(NR)/K562-NR2F1-ChIP-Seq(Encode)/Homer	GKBCARAGGTCA	1e-07	-16.58	0	848	0.2365	19251.1	0.2004
H3K27acGain	37	Atf2(bZIP)/3T3L1-Atf2-ChIP-Seq(GSE56872)/Homer	NRRTGACGTCAT	1e-07	-16.42	0	181	0.0505	3215.9	0.0335
H3K27acGain	38	EBF2(EBF)/BrownAdipose-EBF2-ChIP-Seq(GSE97114)/Homer	NABTCCCWDGGGAVH	1e-06	-14.09	0	439	0.1225	9385.4	0.0977
H3K27acGain	39	NF1(CTF)/LNCAP-NF1-ChIP-Seq(Unpublished)/Homer	CYTGGCABNSTGCCAR	1e-06	-13.92	0	207	0.0577	3931.4	0.0409
H3K27acGain	40	COUP-TFII(NR)/Artia-Nr2f2-ChIP-Seq(GSE46497)/Homer	AGRGGTCA	1e-06	-14.21	0	927	0.2586	21545.4	0.2242
H3K27acGain	41	Unknown-ESC-element(?)/mES-Nanog-ChIP-Seq(GSE11724)/Homer	CACAGCAGGGGG	1e-06	-14.66	0	300	0.0837	6025.1	0.0627
H3K27acGain	42	JunD(bZIP)/K562-JunD-ChIP-Seq/Homer	ATGACGTCATCN	1e-06	-14.21	0	42	0.0117	477.1	0.005
H3K27acGain	43	Hoxa13(Homeobox)/ChickenMSG-Hoxa13.Flag-ChIP-Seq(GSE86088)/Homer	CYHATAAAAN	1e-06	-15.11	0	876	0.2444	20134.6	0.2095
H3K27acGain	44	Hoxc13(Homeobox)/EB-Hoxc13.HA-ChIP-Seq(GSE142377)/Homer	TTTTATKRGN	1e-06	-15.48	0	493	0.1375	10566.5	0.11
H3K27acGain	45	EAR2(NR)/K562-NR2F6-ChIP-Seq(Encode)/Homer	NRBCARRGGTCA	1e-06	-15.94	0	800	0.2232	18118	0.1886
H3K27acGain	46	EBF1(EBF)/Near-E2A-ChIP-Seq(GSE21512)/Homer	GTCCCCWGGGGA	1e-06	-15.98	0	541	0.1509	11689.2	0.1217
H3K27acGain	47	Atf1(bZIP)/K562-ATF1-ChIP-Seq(GSE31477)/Homer	GATGACGTCA	1e-06	-14.75	0	409	0.1141	8603.3	0.0895
H3K27acGain	48	Atf7(bZIP)/3T3L1-Atf7-ChIP-Seq(GSE56872)/Homer	NGRTGACGTCAY	1e-05	-11.58	0.0001	308	0.0859	6457.5	0.0672
H3K27acGain	49	WT1(Zf)/Kidney-WT1-ChIP-Seq(GSE90016)/Homer	MCTCCCMCRCAB	1e-05	-13.7	0	287	0.0801	5791.1	0.0603
H3K27acGain	50	Zic2(Zf)/ESC-Zic2-ChIP-Seq(SRP197560)/Homer	CHCAGCRGGRGG	1e-05	-13.48	0	238	0.0664	4668.8	0.0486
H3K27acGain	51	Zic(Zf)/Cerebellum-ZIC1.2-ChIP-Seq(GSE60731)/Homer	CCTGCTGAGH	1e-05	-13.32	0	365	0.1018	7672	0.0798
H3K27acGain	52	ZNF148(Zf)/MDAMB231-ZNF148-ChIP-Seq(GSE147020)/Homer	CCCCTCCCCCAC	1e-05	-12.79	0	327	0.0912	6808.1	0.0709
H3K27acGain	53	KLF17(Zf)/2cell-Klf17-CutnTag(GSE211845)/Homer	GCYCCGCCCCYH	1e-05	-12.65	0	282	0.0787	5753.5	0.0599
H3K27acGain	54	Pitx1(Homeobox)/Chicken-Pitx1-ChIP-Seq(GSE38910)/Homer	TAATCCCN	1e-05	-12.32	0	1907	0.5319	47534.2	0.4947
H3K27acGain	55	AP-2alpha(AP2)/Hela-AP2alpha-ChIP-Seq(GSE31477)/Homer	ATGCCCTGAGGC	1e-05	-12.07	0	438	0.1222	9555.1	0.0994
H3K27acGain	56	Sp1(Zf)/Promoter/Homer	GGCCCCGCCCCC	1e-05	-11.77	0.0001	152	0.0424	2819.4	0.0293
H3K27acGain	57	GSC(Homeobox)/FrogEmbryos-GSC-ChIP-Seq(DRA000576)/Homer	RGGATTAR	0.0001	-9.701	0.0005	913	0.2547	21841.8	0.2273
H3K27acGain	58	CREB5(bZIP)/LNCaP-CREB5.V5-ChIP-Seq(GSE137775)/Homer	VVATGACGTCAT	0.0001	-9.737	0.0004	156	0.0435	3032.3	0.0316
H3K27acGain	59	TFE3(bHLH)/MEF-TFE3-ChIP-Seq(GSE75757)/Homer	GTCACGTGACYV	0.0001	-9.335	0.0006	38	0.0106	513.5	0.0053
H3K27acGain	60	AP-2gamma(AP2)/MCF7-TFAP2C-ChIP-Seq(GSE21234)/Homer	SCCTSAGGSCAW	0.0001	-9.779	0.0004	538	0.1501	12292.7	0.1279
H3K27acGain	61	USF1(bHLH)/GM12878-Usf1-ChIP-Seq(GSE32465)/Homer	SGTCACGTGR	0.0001	-9.635	0.0005	179	0.0499	3569.3	0.0371
H3K27acGain	62	Cdx2(Homeobox)/mES-Cdx2-ChIP-Seq(GSE14586)/Homer	GYMATAAAAH	0.0001	-10.84	0.0002	238	0.0664	4858.3	0.0506
H3K27acGain	63	HOXB13(Homeobox)/ProstateTumor-HOXB13-ChIP-Seq(GSE56288)/Homer	TTTTATKRGG	0.0001	-11.44	0.0001	364	0.1015	7817.3	0.0814
H3K27acGain	64	Zfp281(Zf)/ES-Zfp281-ChIP-Seq(GSE81042)/Homer	CCCCTCCCCCAC	0.0001	-11.47	0.0001	111	0.031	1933.1	0.0201
H3K27acGain	65	Hoxd12(Homeobox)/ChickenMSG-Hoxd12.Flag-ChIP-Seq(GSE86088)/Homer	HDGYAATGAAAN	0.0001	-10.11	0.0003	841	0.2346	19926.3	0.2074
H3K27acGain	66	Tlx?(NR)/NPC-H3K4me1-ChIP-Seq(GSE16256)/Homer	CTGGCAGSCTGCCA	0.0001	-11.51	0.0001	212	0.0591	4202.5	0.0437
H3K27acGain	67	E-box(bHLH)/Promoter/Homer	SSGGTCACGTGA	0.001	-7.862	0.0022	38	0.0106	554.3	0.0058
H3K27acGain	68	Hoxd11(Homeobox)/ChickenMSG-Hoxd11.Flag-ChIP-Seq(GSE86088)/Homer	VGCCATAAAA	0.001	-7.732	0.0025	805	0.2245	19393.1	0.2018
H3K27acGain	69	TEAD1(TEAD)/HepG2-TEAD1-ChIP-Seq(Encode)/Homer	CYRCATTCCA	0.001	-7.731	0.0025	371	0.1035	8387.6	0.0873
H3K27acGain	70	Rfx2(HTH)/LoVo-RFX2-ChIP-Seq(GSE49402)/Homer	GTTGCCATGGCAACM	0.001	-7.6	0.0028	38	0.0106	562.7	0.0059
H3K27acGain	71	Hoxc9(Homeobox)/Ainv15-Hoxc9-ChIP-Seq(GSE21812)/Homer	GGCCATAAATCA	0.001	-7.468	0.0031	161	0.0449	3311.1	0.0345
H3K27acGain	72	CRX(Homeobox)/Retina-Crx-ChIP-Seq(GSE20012)/Homer	GCTAATCC	0.001	-7.357	0.0034	1228	0.3425	30479.5	0.3172
H3K27acGain	73	Smad3(MAD)/NPC-Smad3-ChIP-Seq(GSE36673)/Homer	TWGTCTGV	0.001	-7.982	0.002	1100	0.3068	26999.2	0.281
H3K27acGain	74	ZNF711(Zf)/SHSY5Y-ZNF711-ChIP-Seq(GSE20673)/Homer	AGGCCTAG	0.001	-7.331	0.0035	937	0.2614	22882.5	0.2381
H3K27acGain	75	Tcf3(HMG)/mES-Tcf3-ChIP-Seq(GSE11724)/Homer	ASWTCAAAGG	0.001	-7.162	0.0041	84	0.0234	1559.6	0.0162
H3K27acGain	76	TRPS1(Zf)/MCF7-TRPS1-ChIP-Seq(GSE107013)/Homer	AGATAAGANN	0.001	-7.16	0.0041	672	0.1874	16076.8	0.1673
H3K27acGain	77	ZNF467(Zf)/HEK293-ZNF467.GFP-ChIP-Seq(GSE58341)/Homer	TGGGGAAGGGCM	0.001	-7.406	0.0033	401	0.1119	9175.1	0.0955
H3K27acGain	78	THRb(NR)/Liver-NR1A2-ChIP-Seq(GSE52613)/Homer	TRAGGTCA	0.001	-8.021	0.002	1666	0.4647	41922.2	0.4363
H3K27acGain	79	Mef2a(MADS)/HL1-Mef2a.biotin-ChIP-Seq(GSE21529)/Homer	CYAAAAATAG	0.001	-7.543	0.0029	403	0.1124	9207.1	0.0958
H3K27acGain	80	MafK(bZIP)/C2C12-MafK-ChIP-Seq(GSE36030)/Homer	GCTGASTCAGCA	0.001	-8.157	0.0018	106	0.0296	1995.5	0.0208
H3K27acGain	81	EKLF(Zf)/Erythrocyte-Klf1-ChIP-Seq(GSE20478)/Homer	NWGGGTGTGGCY	0.001	-8.051	0.0019	144	0.0402	2870.6	0.0299
H3K27acGain	82	Hoxd13(Homeobox)/ChickenMSG-Hoxd13.Flag-ChIP-Seq(GSE86088)/Homer	NCYAATAAAA	0.001	-9.007	0.0009	543	0.1515	12519.6	0.1303
H3K27acGain	83	RXR(NR),DR1/3T3L1-RXR-ChIP-Seq(GSE13511)/Homer	TAGGGCAAAGGTCA	0.001	-8.784	0.0011	484	0.135	11069.4	0.1152
H3K27acGain	84	Hoxd10(Homeobox)/ChickenMSG-Hoxd10.Flag-ChIP-Seq(GSE86088)/Homer	GGCMATGAAA	0.001	-8.514	0.0014	370	0.1032	8269.4	0.0861
H3K27acGain	85	Hoxa11(Homeobox)/ChickenMSG-Hoxa11.Flag-ChIP-Seq(GSE86088)/Homer	TTTTATGGCM	0.001	-8.494	0.0014	766	0.2137	18261.9	0.1901
H3K27acGain	86	RFX(HTH)/K562-RFX3-ChIP-Seq(SRA012198)/Homer	CGGTTGCCATGGCAAC	0.001	-8.546	0.0013	36	0.01	496.5	0.0052
H3K27acGain	87	Mef2b(MADS)/HEK293-Mef2b.V5-ChIP-Seq(GSE67450)/Homer	GCTATTTTTGGM	0.001	-8.402	0.0015	545	0.152	12653.4	0.1317
H3K27acGain	88	CDX4(Homeobox)/ZebrafishEmbryos-Cdx4.Myc-ChIP-Seq(GSE48254)/Homer	NGYCATAAAWCH	0.001	-8.351	0.0015	285	0.0795	6204.8	0.0646
H3K27acGain	89	Mef2d(MADS)/Retina-Mef2d-ChIP-Seq(GSE61391)/Homer	GCTATTTTTAGC	0.001	-8.265	0.0016	98	0.0273	1810.4	0.0188
H3K27acGain	90	Unknown(Homeobox)/Limb-p300-ChIP-Seq/Homer	SSCMATWAAA	0.001	-8.188	0.0017	225	0.0628	4771.8	0.0497
H3K27acGain	91	GLIS3(Zf)/Thyroid-Glis3.GFP-ChIP-Seq(GSE103297)/Homer	CTCCCTGGGAGGCCN	0.001	-8.49	0.0014	1118	0.3119	27371.6	0.2849
H3K27acGain	92	CEBP(bZIP)/ThioMac-CEBPb-ChIP-Seq(GSE21512)/Homer	ATTGCGCAAC	0.01	-5.585	0.0158	296	0.0826	6797.3	0.0707
H3K27acGain	93	TCFL2(HMG)/K562-TCF7L2-ChIP-Seq(GSE29196)/Homer	ACWTCAAAGG	0.01	-5.212	0.022	28	0.0078	439.1	0.0046
H3K27acGain	94	ZNF143|STAF(Zf)/CUTLL-ZNF143-ChIP-Seq(GSE29600)/Homer	ATTTCCCAGVAKSCY	0.01	-5.56	0.0161	174	0.0485	3793.6	0.0395
H3K27acGain	95	Fox:Ebox(Forkhead,bHLH)/Panc1-Foxa2-ChIP-Seq(GSE47459)/Homer	NNNVCTGWGYAAACASN	0.01	-5.397	0.0188	283	0.0789	6498.4	0.0676
H3K27acGain	96	Chop(bZIP)/MEF-Chop-ChIP-Seq(GSE35681)/Homer	ATTGCATCAT	0.01	-5.363	0.0192	88	0.0245	1762.7	0.0183
H3K27acGain	97	Reverb(NR),DR2/RAW-Reverba.biotin-ChIP-Seq(GSE45914)/Homer	GTRGGTCASTGGGTCA	0.01	-5.296	0.0204	89	0.0248	1790.6	0.0186
H3K27acGain	98	STAT5(Stat)/mCD4+-Stat5-ChIP-Seq(GSE12346)/Homer	RTTTCTNAGAAA	0.01	-5.214	0.022	105	0.0293	2171.8	0.0226
H3K27acGain	99	STAT4(Stat)/CD4-Stat4-ChIP-Seq(GSE22104)/Homer	NYTTCCWGGAAR	0.01	-5.208	0.022	298	0.0831	6899.5	0.0718
H3K27acGain	100	PBX2(Homeobox)/K562-PBX2-ChIP-Seq(Encode)/Homer	RTGATTKATRGN	0.01	-4.888	0.0287	229	0.0639	5221.4	0.0543
H3K27acGain	101	NFIL3(bZIP)/HepG2-NFIL3-ChIP-Seq(Encode)/Homer	VTTACGTAAYNNNNN	0.01	-5.077	0.0243	195	0.0544	4358.6	0.0454
H3K27acGain	102	Egr2(Zf)/Thymocytes-Egr2-ChIP-Seq(GSE34254)/Homer	NGCGTGGGCGGR	0.01	-5.023	0.0255	68	0.019	1324.8	0.0138
H3K27acGain	103	CLOCK(bHLH)/Liver-Clock-ChIP-Seq(GSE39860)/Homer	GHCACGTG	0.01	-4.912	0.0282	179	0.0499	3984.1	0.0415
H3K27acGain	104	Nur77(NR)/K562-NR4A1-ChIP-Seq(GSE31363)/Homer	TGACCTTTNCNT	0.01	-4.756	0.032	57	0.0159	1090.5	0.0113
H3K27acGain	105	MafB(bZIP)/BMM-Mafb-ChIP-Seq(GSE75722)/Homer	WNTGCTGASTCAGCANWTTY	0.01	-4.862	0.0292	165	0.046	3647.9	0.038
H3K27acGain	106	Atf4(bZIP)/MEF-Atf4-ChIP-Seq(GSE35681)/Homer	MTGATGCAAT	0.01	-4.775	0.0316	101	0.0282	2112.7	0.022
H3K27acGain	107	ZFX(Zf)/mES-Zfx-ChIP-Seq(GSE11431)/Homer	AGGCCTRG	0.01	-5.658	0.0148	627	0.1749	15193.8	0.1581
H3K27acGain	108	Foxf1(Forkhead)/Lung-Foxf1-ChIP-Seq(GSE77951)/Homer	WWATRTAAACAN	0.01	-5.163	0.0225	280	0.0781	6455	0.0672
H3K27acGain	109	THRa(NR)/C17.2-THRa-ChIP-Seq(GSE38347)/Homer	GGTCANYTGAGGWCA	0.01	-5.699	0.0145	357	0.0996	8309.3	0.0865
H3K27acGain	110	TEAD(TEA)/Fibroblast-PU.1-ChIP-Seq(Unpublished)/Homer	YCWGGAATGY	0.01	-6.563	0.007	262	0.0731	5834.7	0.0607
H3K27acGain	111	Tcf7(HMG)/GM12878-TCF7-ChIP-Seq(Encode)/Homer	CTTTGATGTGSB	0.01	-5.837	0.0128	104	0.029	2100.6	0.0219
H3K27acGain	112	HLF(bZIP)/HSC-HLF.Flag-ChIP-Seq(GSE69817)/Homer	RTTATGYAAB	0.01	-4.695	0.0337	246	0.0686	5670.8	0.059
H3K27acGain	113	CRE(bZIP)/Promoter/Homer	CSGTGACGTCAC	0.01	-6.882	0.0053	79	0.022	1463.7	0.0152
H3K27acGain	114	BMAL1(bHLH)/Liver-Bmal1-ChIP-Seq(GSE39860)/Homer	GNCACGTG	0.01	-6.871	0.0053	617	0.1721	14718.1	0.1532
H3K27acGain	115	CEBP:AP1(bZIP)/ThioMac-CEBPb-ChIP-Seq(GSE21512)/Homer	DRTGTTGCAA	0.01	-6.641	0.0066	252	0.0703	5580.1	0.0581
H3K27acGain	116	Smad4(MAD)/ESC-SMAD4-ChIP-Seq(GSE29422)/Homer	VBSYGTCTGG	0.01	-6.546	0.0071	600	0.1674	14339.6	0.1492
H3K27acGain	117	ERRg(NR)/Kidney-ESRRG-ChIP-Seq(GSE104905)/Homer	GTGACCTTGRVN	0.01	-6.538	0.0071	320	0.0893	7270.3	0.0757
H3K27acGain	118	Egr1(Zf)/K562-Egr1-ChIP-Seq(GSE32465)/Homer	TGCGTGGGYG	0.01	-6.475	0.0074	267	0.0745	5967.9	0.0621
H3K27acGain	119	VDR(NR),DR3/GM10855-VDR+vitD-ChIP-Seq(GSE22484)/Homer	ARAGGTCANWGAGTTCANNN	0.01	-5.7	0.0145	91	0.0254	1808	0.0188
H3K27acGain	120	Bcl11a(Zf)/HSPC-BCL11A-ChIP-Seq(GSE104676)/Homer	TYTGACCASWRG	0.01	-6.402	0.0079	433	0.1208	10119.6	0.1053
H3K27acGain	121	Mef2c(MADS)/GM12878-Mef2c-ChIP-Seq(GSE32465)/Homer	DCYAAAAATAGM	0.01	-6.297	0.0086	434	0.1211	10160.5	0.1057
H3K27acGain	122	LEF1(HMG)/H1-LEF1-ChIP-Seq(GSE64758)/Homer	CCTTTGATST	0.01	-6.263	0.0088	206	0.0575	4498.4	0.0468
H3K27acGain	123	GATA3(Zf)/iTreg-Gata3-ChIP-Seq(GSE20898)/Homer	AGATAASR	0.01	-6.01	0.0112	500	0.1395	11879.6	0.1236
H3K27acGain	124	FOXA1(Forkhead)/MCF7-FOXA1-ChIP-Seq(GSE26831)/Homer	WAAGTAAACA	0.01	-5.978	0.0115	321	0.0895	7368.8	0.0767
H3K27acGain	125	Esrrb(NR)/mES-Esrrb-ChIP-Seq(GSE11431)/Homer	KTGACCTTGA	0.01	-5.948	0.0117	256	0.0714	5758.7	0.0599
H3K27acGain	126	Hoxd9(Homeobox)/EB-Hoxd9.HA-ChIP-Seq(GSE142377)/Homer	RTGATTTATGGY	0.01	-5.9	0.0122	109	0.0304	2212.6	0.023
H3K27acGain	127	KLF10(Zf)/HEK293-KLF10.GFP-ChIP-Seq(GSE58341)/Homer	GGGGGTGTGTCC	0.01	-5.893	0.0122	238	0.0664	5321.6	0.0554
H3K27acGain	128	Hoxc6(Homeobox)/EB-Hoxc6.iFlag-ChIP-Seq(GSE142377)/Homer	CMATYAATCW	0.01	-6.311	0.0086	905	0.2524	22257	0.2316
H3K27acGain	129	FoxD3(forkhead)/ZebrafishEmbryo-Foxd3.biotin-ChIP-seq(GSE106676)/Homer	TGTTTAYTTAGC	0.01	-4.685	0.0338	281	0.0784	6548.6	0.0682
CTCFLoss	1	CTCF(Zf)/CD4+-CTCF-ChIP-Seq(Barski_et_al.)/Homer	AYAGTGCCMYCTRGTGGCCA	1e-39	-91.85	0	39	0.1931	807.8	0.0083
CTCFLoss	2	BORIS(Zf)/K562-CTCFL-ChIP-Seq(GSE32465)/Homer	CNNBRGCGCCCCCTGSTGGC	1e-28	-65.74	0	37	0.1832	1402	0.0144
CTCFLoss	3	SCL(bHLH)/HPC7-Scl-ChIP-Seq(GSE13511)/Homer	AVCAGCTG	0.001	-9.164	0.0165	122	0.604	45981.3	0.4714
CTCFLoss	4	Nanog(Homeobox)/mES-Nanog-ChIP-Seq(GSE11724)/Homer	RGCCATTAAC	0.01	-6.313	0.2139	102	0.505	39142.2	0.4013
CTCFLoss	5	Mesp1(bHLH)/ESC-Mesp1-ChIP-Seq(GSE165102)/Homer	RCCATTTGBY	0.01	-5	0.636	17	0.0842	4192.6	0.043
CTCFLoss	6	HIC1(Zf)/Treg-ZBTB29-ChIP-Seq(GSE99889)/Homer	TGCCAGCB	0.01	-4.909	0.636	66	0.3267	24220.1	0.2483
CTCFGain	1	BORIS(Zf)/K562-CTCFL-ChIP-Seq(GSE32465)/Homer	CNNBRGCGCCCCCTGSTGGC	1e-10	-24.15	0	15	0.2586	2623.8	0.0272
CTCFGain	2	CTCF(Zf)/CD4+-CTCF-ChIP-Seq(Barski_et_al.)/Homer	AYAGTGCCMYCTRGTGGCCA	0.001	-8.894	0.0324	6	0.1034	1307.1	0.0136
CTCFGain	3	p73(p53)/Trachea-p73-ChIP-Seq(PRJNA310161)/Homer	NRRRCAWGTCCDGRCATGYY	0.01	-6.014	0.3847	3	0.0517	441.8	0.0046
CTCFGain	4	p63(p53)/Keratinocyte-p63-ChIP-Seq(GSE17611)/Homer	NNDRCATGYCYNRRCATGYH	0.01	-5.947	0.3847	8	0.1379	3996.1	0.0414

## Sheet: Table S3
id	rank	motif	consensus	pval	logpval	qval	no. target sequence with motif	% target sequence with motif	no. bg. sequence with motif	% bg. sequence with motif
H3K27acLoss	1	FOXP1(Forkhead)/H9-FOXP1-ChIP-Seq(GSE31006)/Homer	NYYTGTTTACHN	1e-08	-18.97	0	77	0.0575	2756.4	0.028
H3K27acLoss	2	FOXK2(Forkhead)/U2OS-FOXK2-ChIP-Seq(E-MTAB-2204)/Homer	SCHTGTTTACAT	1e-07	-16.89	0	109	0.0813	4646.7	0.0472
H3K27acLoss	3	Maz(Zf)/HepG2-Maz-ChIP-Seq(GSE31477)/Homer	GGGGGGGG	1e-05	-12.41	0.0006	233	0.1739	12886.9	0.1308
H3K27acLoss	4	Foxo3(Forkhead)/U2OS-Foxo3-ChIP-Seq(E-MTAB-2701)/Homer	DGTAAACA	1e-05	-12.32	0.0006	105	0.0784	4892.1	0.0496
H3K27acLoss	5	KLF1(Zf)/HUDEP2-KLF1-CutnRun(GSE136251)/Homer	VDGGGYGGGGCY	0.0001	-10.42	0.0017	188	0.1403	10338.2	0.1049
H3K27acLoss	6	Foxf1(Forkhead)/Lung-Foxf1-ChIP-Seq(GSE77951)/Homer	WWATRTAAACAN	0.0001	-10.48	0.0017	130	0.097	6650.1	0.0675
H3K27acLoss	7	Zfp281(Zf)/ES-Zfp281-ChIP-Seq(GSE81042)/Homer	CCCCTCCCCCAC	0.0001	-10.07	0.002	46	0.0343	1779.4	0.0181
H3K27acLoss	8	Sox21(HMG)/ESC-SOX21-ChIP-Seq(GSE110505)/Homer	BCCWTTGTBYKV	0.0001	-10.97	0.0014	263	0.1963	15152.4	0.1538
H3K27acLoss	9	GATA3(Zf)/iTreg-Gata3-ChIP-Seq(GSE20898)/Homer	AGATAASR	0.0001	-11.34	0.0011	227	0.1694	12698.5	0.1289
H3K27acLoss	10	FOXK1(Forkhead)/HEK293-FOXK1-ChIP-Seq(GSE51673)/Homer	NVWTGTTTAC	0.0001	-10.83	0.0014	142	0.106	7343.8	0.0745
H3K27acLoss	11	FoxL2(Forkhead)/Ovary-FoxL2-ChIP-Seq(GSE60858)/Homer	WWTRTAAACAVG	0.001	-7.47	0.012	113	0.0843	6069.3	0.0616
H3K27acLoss	12	Gata2(Zf)/K562-GATA2-ChIP-Seq(GSE18829)/Homer	BBCTTATCTS	0.001	-6.924	0.0152	92	0.0687	4839	0.0491
H3K27acLoss	13	Gata4(Zf)/Heart-Gata4-ChIP-Seq(GSE35151)/Homer	NBWGATAAGR	0.001	-6.972	0.0152	138	0.103	7770.8	0.0789
H3K27acLoss	14	Zic2(Zf)/ESC-Zic2-ChIP-Seq(SRP197560)/Homer	CHCAGCRGGRGG	0.001	-6.979	0.0152	80	0.0597	4084.7	0.0415
H3K27acLoss	15	PU.1:IRF8(ETS:IRF)/pDC-Irf8-ChIP-Seq(GSE66899)/Homer	GGAAGTGAAAST	0.001	-7.044	0.0147	39	0.0291	1652.4	0.0168
H3K27acLoss	16	Gata1(Zf)/K562-GATA1-ChIP-Seq(GSE18829)/Homer	SAGATAAGRV	0.001	-7.117	0.0144	84	0.0627	4310.1	0.0437
H3K27acLoss	17	Nrf2(bZIP)/Lymphoblast-Nrf2-ChIP-Seq(GSE37589)/Homer	HTGCTGAGTCAT	0.001	-7.175	0.0144	13	0.0097	330.7	0.0034
H3K27acLoss	18	NFATC2(RHD)/Islets-NFATC2-ChIP-Seq(GSE158496)/Homer	WTTTTCCATTGS	0.001	-7.179	0.0144	305	0.2276	18963	0.1924
H3K27acLoss	19	KLF17(Zf)/2cell-Klf17-CutnTag(GSE211845)/Homer	GCYCCGCCCCYH	0.001	-7.277	0.0136	78	0.0582	3918.4	0.0398
H3K27acLoss	20	HIF2a(bHLH)/785_O-HIF2a-ChIP-Seq(GSE34871)/Homer	GCACGTACCC	0.001	-7.485	0.012	49	0.0366	2173.2	0.0221
H3K27acLoss	21	MITF(bHLH)/MastCells-MITF-ChIP-Seq(GSE48085)/Homer	RTCATGTGAC	0.001	-6.967	0.0152	136	0.1015	7641.4	0.0775
H3K27acLoss	22	CTCF(Zf)/CD4+-CTCF-ChIP-Seq(Barski_et_al.)/Homer	AYAGTGCCMYCTRGTGGCCA	0.001	-7.809	0.0098	22	0.0164	708.8	0.0072
H3K27acLoss	23	RUNX2(Runt)/PCa-RUNX2-ChIP-Seq(GSE33889)/Homer	NWAACCACADNN	0.001	-7.843	0.0098	129	0.0963	7021.8	0.0713
H3K27acLoss	24	EBF2(EBF)/BrownAdipose-EBF2-ChIP-Seq(GSE97114)/Homer	NABTCCCWDGGGAVH	0.001	-8.004	0.0088	169	0.1261	9578.8	0.0972
H3K27acLoss	25	Bach2(bZIP)/OCILy7-Bach2-ChIP-Seq(GSE44420)/Homer	TGCTGAGTCA	0.001	-8.178	0.0078	37	0.0276	1448	0.0147
H3K27acLoss	26	Oct4(POU,Homeobox)/mES-Oct4-ChIP-Seq(GSE11431)/Homer	ATTTGCATAW	0.001	-8.286	0.0078	70	0.0522	3306	0.0335
H3K27acLoss	27	AP-1(bZIP)/ThioMac-PU.1-ChIP-Seq(GSE21512)/Homer	VTGACTCATC	0.001	-8.32	0.0078	111	0.0828	5801.6	0.0589
H3K27acLoss	28	MafF(bZIP)/HepG2-MafF-ChIP-Seq(GSE31477)/Homer	HWWGTCAGCAWWTTT	0.001	-8.396	0.0078	57	0.0425	2536.1	0.0257
H3K27acLoss	29	Sp5(Zf)/mES-Sp5.Flag-ChIP-Seq(GSE72989)/Homer	RGKGGGCGGAGC	0.001	-8.473	0.0078	185	0.1381	10528.9	0.1068
H3K27acLoss	30	TRPS1(Zf)/MCF7-TRPS1-ChIP-Seq(GSE107013)/Homer	AGATAAGANN	0.001	-8.525	0.0078	284	0.2119	17145.6	0.174
H3K27acLoss	31	TEAD1(TEAD)/HepG2-TEAD1-ChIP-Seq(Encode)/Homer	CYRCATTCCA	0.001	-9.003	0.0053	169	0.1261	9377.6	0.0952
H3K27acLoss	32	Klf15(Zf)/Liver-Klf15-ChIP-Seq(GSE166083)/Homer	RGGGGGCGGGGC	0.001	-7.666	0.0105	201	0.15	11767.5	0.1194
H3K27acLoss	33	Stat3(Stat)/mES-Stat3-ChIP-Seq(GSE11431)/Homer	CTTCCGGGAA	0.01	-5.439	0.0419	78	0.0582	4208.2	0.0427
H3K27acLoss	34	Atf3(bZIP)/GBM-ATF3-ChIP-Seq(GSE33912)/Homer	DATGASTCATHN	0.01	-5.378	0.0436	90	0.0672	4985.4	0.0506
H3K27acLoss	35	TEAD2(TEA)/Py2T-Tead2-ChIP-Seq(GSE55709)/Homer	CCWGGAATGY	0.01	-5.276	0.0473	96	0.0716	5392.7	0.0547
H3K27acLoss	36	MYB(HTH)/ERMYB-Myb-ChIPSeq(GSE22095)/Homer	GGCVGTTR	0.01	-5.214	0.0494	212	0.1582	13173.3	0.1337
H3K27acLoss	37	TEAD3(TEA)/HepG2-TEAD3-ChIP-Seq(Encode)/Homer	TRCATTCCAG	0.01	-5.209	0.0494	173	0.1291	10519.3	0.1068
H3K27acLoss	38	Fra1(bZIP)/BT549-Fra1-ChIP-Seq(GSE46166)/Homer	NNATGASTCATH	0.01	-4.75	0.0704	71	0.053	3887.2	0.0394
H3K27acLoss	39	VDR(NR),DR3/GM10855-VDR+vitD-ChIP-Seq(GSE22484)/Homer	ARAGGTCANWGAGTTCANNN	0.01	-5.099	0.0524	40	0.0299	1915.9	0.0194
H3K27acLoss	40	Bach1(bZIP)/K562-Bach1-ChIP-Seq(GSE31477)/Homer	AWWNTGCTGAGTCAT	0.01	-5.002	0.0567	11	0.0082	332.6	0.0034
H3K27acLoss	41	KLF6(Zf)/PDAC-KLF6-ChIP-Seq(GSE64557)/Homer	MKGGGYGTGGCC	0.01	-4.85	0.0649	180	0.1343	11099.9	0.1126
H3K27acLoss	42	Oct2(POU,Homeobox)/Bcell-Oct2-ChIP-Seq(GSE21512)/Homer	ATATGCAAAT	0.01	-5.533	0.0389	45	0.0336	2159.2	0.0219
H3K27acLoss	43	BMYB(HTH)/Hela-BMYB-ChIP-Seq(GSE27030)/Homer	NHAACBGYYV	0.01	-4.706	0.0724	184	0.1373	11416.4	0.1159
H3K27acLoss	44	SOX1(HMG)/NPC-SOX1-ChIP-Seq(GSE138215)/Homer	CCATTGTTCB	0.01	-5.179	0.0494	309	0.2306	19909.4	0.202
H3K27acLoss	45	WT1(Zf)/Kidney-WT1-ChIP-Seq(GSE90016)/Homer	MCTCCCMCRCAB	0.01	-5.617	0.0365	98	0.0731	5453.3	0.0553
H3K27acLoss	46	EBF(EBF)/proBcell-EBF-ChIP-Seq(GSE21978)/Homer	DGTCCCYRGGGA	0.01	-6.085	0.0262	44	0.0328	2035.8	0.0207
H3K27acLoss	47	Foxo1(Forkhead)/RAW-Foxo1-ChIP-Seq(Fan_et_al.)/Homer	CTGTTTAC	0.01	-5.753	0.0333	281	0.2097	17755.2	0.1802
H3K27acLoss	48	KLF3(Zf)/MEF-Klf3-ChIP-Seq(GSE44748)/Homer	NRGCCCCRCCCHBNN	0.01	-5.777	0.0332	105	0.0784	5873.5	0.0596
H3K27acLoss	49	NF-E2(bZIP)/K562-NFE2-ChIP-Seq(GSE31477)/Homer	GATGACTCAGCA	0.01	-5.818	0.0326	13	0.0097	386.5	0.0039
H3K27acLoss	50	KLF14(Zf)/HEK293-KLF14.GFP-ChIP-Seq(GSE58341)/Homer	RGKGGGCGKGGC	0.01	-5.957	0.0291	327	0.244	20888.5	0.212
H3K27acLoss	51	BATF(bZIP)/Th17-BATF-ChIP-Seq(GSE39756)/Homer	DATGASTCAT	0.01	-6.318	0.0213	91	0.0679	4877.8	0.0495
H3K27acLoss	52	Sox9(HMG)/Limb-SOX9-ChIP-Seq(GSE73225)/Homer	AGGVNCCTTTGT	0.01	-6.49	0.0184	128	0.0955	7219.5	0.0733
H3K27acLoss	53	ZNF148(Zf)/MDAMB231-ZNF148-ChIP-Seq(GSE147020)/Homer	CCCCTCCCCCAC	0.01	-6.662	0.0165	114	0.0851	6280.2	0.0637
H3K27acLoss	54	Gata6(Zf)/HUG1N-GATA6-ChIP-Seq(GSE51936)/Homer	YCTTATCTBN	0.01	-6.669	0.0165	122	0.091	6794.4	0.0689
H3K27acLoss	55	Sp2(Zf)/HEK293-Sp2.eGFP-ChIP-Seq(Encode)/Homer	YGGCCCCGCCCC	0.01	-6.675	0.0165	261	0.1948	16087.9	0.1633
H3K27acLoss	56	OCT4-SOX2-TCF-NANOG(POU,Homeobox,HMG)/mES-Oct4-ChIP-Seq(GSE11431)/Homer	ATTTGCATAACAATG	0.01	-6.746	0.0162	29	0.0216	1132.7	0.0115
H3K27acLoss	57	Sox10(HMG)/SciaticNerve-Sox3-ChIP-Seq(GSE35132)/Homer	CCWTTGTYYB	0.01	-6.756	0.0162	224	0.1672	13543.5	0.1374
H3K27acLoss	58	TEAD(TEA)/Fibroblast-PU.1-ChIP-Seq(Unpublished)/Homer	YCWGGAATGY	0.01	-6.836	0.0154	119	0.0888	6568.2	0.0667
H3K27acLoss	59	BORIS(Zf)/K562-CTCFL-ChIP-Seq(GSE32465)/Homer	CNNBRGCGCCCCCTGSTGGC	0.01	-4.666	0.074	27	0.0201	1204.3	0.0122
H3K27acLoss	60	JunB(bZIP)/DendriticCells-Junb-ChIP-Seq(GSE36099)/Homer	RATGASTCAT	0.01	-5.736	0.0333	76	0.0567	4031.6	0.0409
H3K27acLoss	61	MafK(bZIP)/C2C12-MafK-ChIP-Seq(GSE36030)/Homer	GCTGASTCAGCA	0.01	-4.654	0.074	43	0.0321	2153.8	0.0219
H3K27acGain	1	Atf3(bZIP)/GBM-ATF3-ChIP-Seq(GSE33912)/Homer	DATGASTCATHN	0.0001	-11.39	0.0054	94	0.0914	5716.7	0.0578
H3K27acGain	2	AP-1(bZIP)/ThioMac-PU.1-ChIP-Seq(GSE21512)/Homer	VTGACTCATC	0.0001	-10.84	0.0054	101	0.0982	6347.4	0.0642
H3K27acGain	3	Oct4(POU,Homeobox)/mES-Oct4-ChIP-Seq(GSE11431)/Homer	ATTTGCATAW	0.0001	-10.24	0.0056	96	0.0934	6052.2	0.0612
H3K27acGain	4	Fra1(bZIP)/BT549-Fra1-ChIP-Seq(GSE46166)/Homer	NNATGASTCATH	0.0001	-9.895	0.0059	77	0.0749	4630.1	0.0468
H3K27acGain	5	Fra2(bZIP)/Striatum-Fra2-ChIP-Seq(GSE43429)/Homer	GGATGACTCATC	0.0001	-9.884	0.0059	65	0.0632	3725.4	0.0377
H3K27acGain	6	BATF(bZIP)/Th17-BATF-ChIP-Seq(GSE39756)/Homer	DATGASTCAT	0.001	-7.506	0.0324	85	0.0827	5658.3	0.0572
H3K27acGain	7	Lhx6/Neurons-Lhx6-ChIP-seq(GSE85704)/Homer	YCCTRATTAG	0.001	-7.143	0.0414	186	0.1809	14312.9	0.1448
H3K27acGain	8	JunB(bZIP)/DendriticCells-Junb-ChIP-Seq(GSE36099)/Homer	RATGASTCAT	0.001	-9.061	0.0091	75	0.073	4601.2	0.0465
H3K27acGain	9	Fos(bZIP)/TSC-Fos-ChIP-Seq(GSE110950)/Homer	NDATGASTCAYN	0.001	-9.014	0.0091	81	0.0788	5075.4	0.0513
H3K27acGain	10	Lhx3(Homeobox)/Neuron-Lhx3-ChIP-Seq(GSE31456)/Homer	ADBTAATTAR	0.01	-5.564	0.0904	264	0.2568	21873.5	0.2213
H3K27acGain	11	MyoD(bHLH)/Myotube-MyoD-ChIP-Seq(GSE21614)/Homer	RRCAGCTGYTSY	0.01	-4.732	0.1539	72	0.07	5181.1	0.0524
H3K27acGain	12	NFE2L2(bZIP)/HepG2-NFE2L2-ChIP-Seq(Encode)/Homer	AWWWTGCTGAGTCAT	0.01	-4.788	0.1512	10	0.0097	387.7	0.0039
H3K27acGain	13	Fosl2(bZIP)/3T3L1-Fosl2-ChIP-Seq(GSE56872)/Homer	NATGASTCABNN	0.01	-5.036	0.1227	37	0.036	2285.7	0.0231
H3K27acGain	14	EWS:ERG-fusion(ETS)/CADO_ES1-EWS:ERG-ChIP-Seq(SRA014231)/Homer	ATTTCCTGTN	0.01	-5.376	0.093	104	0.1012	7724.1	0.0781
H3K27acGain	15	Brn1(POU,Homeobox)/NPC-Brn1-ChIP-Seq(GSE35496)/Homer	TATGCWAATBAV	0.01	-5.412	0.093	57	0.0554	3801	0.0385
H3K27acGain	16	Ets1-distal(ETS)/CD4+-PolII-ChIP-Seq(Barski_et_al.)/Homer	MACAGGAAGT	0.01	-5.441	0.093	39	0.0379	2378.4	0.0241
H3K27acGain	17	Sox2(HMG)/mES-Sox2-ChIP-Seq(GSE11431)/Homer	BCCATTGTTC	0.01	-5.501	0.0918	122	0.1187	9235.3	0.0934
H3K27acGain	18	Oct2(POU,Homeobox)/Bcell-Oct2-ChIP-Seq(GSE21512)/Homer	ATATGCAAAT	0.01	-5.688	0.0841	60	0.0584	3990.4	0.0404
H3K27acGain	19	EWS:FLI1-fusion(ETS)/SK_N_MC-EWS:FLI1-ChIP-Seq(SRA014231)/Homer	VACAGGAAAT	0.01	-6.065	0.0731	67	0.0652	4482.2	0.0453
H3K27acGain	20	OCT4-SOX2-TCF-NANOG(POU,Homeobox,HMG)/mES-Oct4-ChIP-Seq(GSE11431)/Homer	ATTTGCATAACAATG	0.01	-5.926	0.0741	41	0.0399	2460.8	0.0249
H3K27acGain	21	Etv2(ETS)/ES-ER71-ChIP-Seq(GSE59402)/Homer	NNAYTTCCTGHN	0.01	-5.989	0.0739	109	0.106	7987.6	0.0808
H3K27acGain	22	Nrf2(bZIP)/Lymphoblast-Nrf2-ChIP-Seq(GSE37589)/Homer	HTGCTGAGTCAT	0.01	-4.641	0.1626	9	0.0088	336.9	0.0034
H3K27acGain	23	Oct11(POU,Homeobox)/NCIH1048-POU2F3-ChIP-seq(GSE115123)/Homer	GATTTGCATA	0.01	-6.204	0.0708	61	0.0593	3975.7	0.0402
H3K27acGain	24	TEAD1(TEAD)/HepG2-TEAD1-ChIP-Seq(Encode)/Homer	CYRCATTCCA	0.01	-6.24	0.0708	143	0.1391	10835.5	0.1096
H3K27acGain	25	HOXA2(Homeobox)/mES-Hoxa2-ChIP-Seq(Donaldson_et_al.)/Homer	GYCATCMATCAT	0.01	-6.443	0.0685	20	0.0195	901	0.0091
H3K27acGain	26	ERG(ETS)/VCaP-ERG-ChIP-Seq(GSE14097)/Homer	ACAGGAAGTG	0.01	-6.499	0.0685	184	0.179	14339.1	0.1451
H3K27acGain	27	MafA(bZIP)/Islet-MafA-ChIP-Seq(GSE30298)/Homer	TGCTGACTCA	0.01	-6.535	0.0685	86	0.0837	5935.3	0.06
H3K27acGain	28	Bach2(bZIP)/OCILy7-Bach2-ChIP-Seq(GSE44420)/Homer	TGCTGAGTCA	0.01	-5.802	0.0793	26	0.0253	1369.4	0.0139
H3K27acGain	29	Zic3(Zf)/mES-Zic3-ChIP-Seq(GSE37889)/Homer	GGCCYCCTGCTGDGH	0.01	-4.62	0.1626	49	0.0477	3308.6	0.0335
CTCFLoss	1	BORIS(Zf)/K562-CTCFL-ChIP-Seq(GSE32465)/Homer	CNNBRGCGCCCCCTGSTGGC	1e-123	-285.3	0	192	0.3024	3176.2	0.0328
CTCFLoss	2	CTCF(Zf)/CD4+-CTCF-ChIP-Seq(Barski_et_al.)/Homer	AYAGTGCCMYCTRGTGGCCA	1e-95	-218.8	0	121	0.1906	1344.3	0.0139
CTCFLoss	3	NeuroD1(bHLH)/Islet-NeuroD1-ChIP-Seq(GSE30298)/Homer	GCCATCTGTT	1e-06	-14.44	0.0001	108	0.1701	10226.6	0.1055
CTCFLoss	4	Zic3(Zf)/mES-Zic3-ChIP-Seq(GSE37889)/Homer	GGCCYCCTGCTGDGH	1e-05	-12.86	0.0003	114	0.1795	11339.5	0.117
CTCFLoss	5	Olig2(bHLH)/Neuron-Olig2-ChIP-Seq(GSE30882)/Homer	RCCATMTGTT	1e-05	-12.67	0.0003	171	0.2693	18876.5	0.1947
CTCFLoss	6	SCL(bHLH)/HPC7-Scl-ChIP-Seq(GSE13511)/Homer	AVCAGCTG	0.001	-6.939	0.039	381	0.6	52174.2	0.5381
CTCFLoss	7	Bcl11a(Zf)/HSPC-BCL11A-ChIP-Seq(GSE104676)/Homer	TYTGACCASWRG	0.001	-6.986	0.039	89	0.1402	9744.5	0.1005
CTCFLoss	8	TCF4(bHLH)/SHSY5Y-TCF4-ChIP-Seq(GSE96915)/Homer	SMCATCTGKH	0.001	-7.108	0.039	148	0.2331	17704.1	0.1826
CTCFLoss	9	NeuroG2(bHLH)/Fibroblast-NeuroG2-ChIP-Seq(GSE75910)/Homer	ACCATCTGTT	0.001	-7.181	0.039	145	0.2283	17257.9	0.178
CTCFLoss	10	LRF(Zf)/Erythroblasts-ZBTB7A-ChIP-Seq(GSE74977)/Homer	AAGACCCYYN	0.001	-7.002	0.039	211	0.3323	26689.4	0.2753
CTCFLoss	11	ZNF415(Zf)/HEK293-ZNF415.GFP-ChIP-Seq(GSE58341)/Homer	GRTGMTRGAGCC	0.001	-8.286	0.0165	76	0.1197	7688.4	0.0793
CTCFLoss	12	Unknown-ESC-element(?)/mES-Nanog-ChIP-Seq(GSE11724)/Homer	CACAGCAGGGGG	0.001	-8.317	0.0165	90	0.1417	9468.1	0.0977
CTCFLoss	13	Zic2(Zf)/ESC-Zic2-ChIP-Seq(SRP197560)/Homer	CHCAGCRGGRGG	0.001	-9.069	0.0091	84	0.1323	8495.7	0.0876
CTCFLoss	14	CTCF-SatelliteElement(Zf?)/CD4+-CTCF-ChIP-Seq(Barski_et_al.)/Homer	TGCAGTTCCMVNWRTGGCCA	0.001	-7.204	0.039	6	0.0094	160.7	0.0017
CTCFLoss	15	Sox9(HMG)/Limb-SOX9-ChIP-Seq(GSE73225)/Homer	AGGVNCCTTTGT	0.01	-4.945	0.1587	54	0.085	5822.9	0.0601
CTCFLoss	16	Atoh1(bHLH)/Cerebellum-Atoh1-ChIP-Seq(GSE22111)/Homer	VNRVCAGCTGGY	0.01	-6.761	0.039	122	0.1921	14259.9	0.1471
CTCFLoss	17	Ascl1(bHLH)/NeuralTubes-Ascl1-ChIP-Seq(GSE55840)/Homer	NNVVCAGCTGBN	0.01	-6.705	0.039	194	0.3055	24390.5	0.2516
CTCFLoss	18	HEB(bHLH)/mES-Heb-ChIP-Seq(GSE53233)/Homer	VCAGCTGBNN	0.01	-6.374	0.0473	247	0.389	32269.8	0.3328
CTCFLoss	19	Atoh7(bHLH)/Retina-Atoh7-CutnRun(GSE156756)/Homer	KRRCAGCTGGTS	0.01	-6.155	0.0557	95	0.1496	10829	0.1117
CTCFLoss	20	FOXM1(Forkhead)/MCF7-FOXM1-ChIP-Seq(GSE72977)/Homer	TRTTTACTTW	0.01	-5.24	0.1316	40	0.063	3964	0.0409
CTCFLoss	21	Ptf1a(bHLH)/Panc1-Ptf1a-ChIP-Seq(GSE47459)/Homer	ACAGCTGTTN	0.01	-5.109	0.1426	286	0.4504	38836.9	0.4006
CTCFLoss	22	BHLHA15(bHLH)/NIH3T3-BHLHB8.HA-ChIP-Seq(GSE119782)/Homer	NAMCAGCTGK	0.01	-4.953	0.1587	137	0.2157	17159.4	0.177
CTCFLoss	23	Zfp57(Zf)/H1-ZFP57.HA-ChIP-Seq(GSE115387)/Homer	NANTGCSGCA	0.01	-4.741	0.1792	47	0.074	4981.1	0.0514
CTCFGain	1	BORIS(Zf)/K562-CTCFL-ChIP-Seq(GSE32465)/Homer	CNNBRGCGCCCCCTGSTGGC	0	-886.6	0	466	0.2838	1878.8	0.0193
CTCFGain	2	CTCF(Zf)/CD4+-CTCF-ChIP-Seq(Barski_et_al.)/Homer	AYAGTGCCMYCTRGTGGCCA	0	-798.3	0	354	0.2156	952.7	0.0098
CTCFGain	3	Unknown-ESC-element(?)/mES-Nanog-ChIP-Seq(GSE11724)/Homer	CACAGCAGGGGG	1e-12	-28.49	0	211	0.1285	7499.1	0.0771
CTCFGain	4	Zic2(Zf)/ESC-Zic2-ChIP-Seq(SRP197560)/Homer	CHCAGCRGGRGG	1e-11	-26.62	0	170	0.1035	5759.8	0.0592
CTCFGain	5	Zic3(Zf)/mES-Zic3-ChIP-Seq(GSE37889)/Homer	GGCCYCCTGCTGDGH	1e-10	-24.07	0	207	0.1261	7687.8	0.079
CTCFGain	6	SCL(bHLH)/HPC7-Scl-ChIP-Seq(GSE13511)/Homer	AVCAGCTG	1e-06	-15.26	0	917	0.5585	48248.3	0.4961
CTCFGain	7	CTCF-SatelliteElement(Zf?)/CD4+-CTCF-ChIP-Seq(Barski_et_al.)/Homer	TGCAGTTCCMVNWRTGGCCA	1e-06	-14.65	0	14	0.0085	149	0.0015
CTCFGain	8	PRDM9(Zf)/Testis-DMC1-ChIP-Seq(GSE35498)/Homer	ADGGYAGYAGCATCT	1e-06	-14.38	0	119	0.0725	4400.9	0.0452
CTCFGain	9	EBF1(EBF)/Near-E2A-ChIP-Seq(GSE21512)/Homer	GTCCCCWGGGGA	1e-06	-14.31	0	287	0.1748	12869.2	0.1323
CTCFGain	10	Tgif2(Homeobox)/mES-Tgif2-ChIP-Seq(GSE55404)/Homer	TGTCANYT	1e-06	-14.04	0	597	0.3636	29940.6	0.3078
CTCFGain	11	RUNX1(Runt)/Jurkat-RUNX1-ChIP-Seq(GSE29180)/Homer	AAACCACARM	0.0001	-9.318	0.0026	195	0.1188	8836	0.0908
CTCFGain	12	NeuroD1(bHLH)/Islet-NeuroD1-ChIP-Seq(GSE30298)/Homer	GCCATCTGTT	0.0001	-9.324	0.0026	199	0.1212	9045.7	0.093
CTCFGain	13	Fli1(ETS)/CD8-FLI-ChIP-Seq(GSE20898)/Homer	NRYTTCCGGH	0.0001	-9.56	0.0022	223	0.1358	10271.3	0.1056
CTCFGain	14	LRF(Zf)/Erythroblasts-ZBTB7A-ChIP-Seq(GSE74977)/Homer	AAGACCCYYN	0.0001	-11.5	0.0004	388	0.2363	18813.6	0.1934
CTCFGain	15	ERG(ETS)/VCaP-ERG-ChIP-Seq(GSE14097)/Homer	ACAGGAAGTG	0.0001	-10.19	0.0014	329	0.2004	15855.6	0.163
CTCFGain	16	HIC1(Zf)/Treg-ZBTB29-ChIP-Seq(GSE99889)/Homer	TGCCAGCB	0.0001	-10.81	0.0008	533	0.3246	27062.3	0.2782
CTCFGain	17	Sox9(HMG)/Limb-SOX9-ChIP-Seq(GSE73225)/Homer	AGGVNCCTTTGT	0.0001	-9.93	0.0016	158	0.0962	6825.6	0.0702
CTCFGain	18	ETS1(ETS)/Jurkat-ETS1-ChIP-Seq(GSE17954)/Homer	ACAGGAAGTG	0.001	-7.14	0.0163	208	0.1267	9928.4	0.1021
CTCFGain	19	n-Myc(bHLH)/mES-nMyc-ChIP-Seq(GSE11431)/Homer	VRCCACGTGG	0.001	-7.034	0.0166	144	0.0877	6547.4	0.0673
CTCFGain	20	E2A(bHLH),near_PU.1/Bcell-PU.1-ChIP-Seq(GSE21512)/Homer	NVCACCTGBN	0.001	-7.114	0.0163	430	0.2619	22220	0.2285
CTCFGain	21	ZNF91(Zf)/HEK-ZNF91.HA-ChIP-Seq(GSE162571)/Homer	RGCMGCCTYC	0.001	-7.231	0.0155	210	0.1279	10017.1	0.103
CTCFGain	22	Nanog(Homeobox)/mES-Nanog-ChIP-Seq(GSE11724)/Homer	RGCCATTAAC	0.001	-7.96	0.0088	679	0.4135	36232.1	0.3725
CTCFGain	23	YY1(Zf)/Promoter/Homer	CAAGATGGCGGC	0.001	-7.932	0.0088	24	0.0146	642.8	0.0066
CTCFGain	24	Ascl1(bHLH)/NeuralTubes-Ascl1-ChIP-Seq(GSE55840)/Homer	NNVVCAGCTGBN	0.001	-7.997	0.0088	394	0.24	19954.7	0.2052
CTCFGain	25	Zac1(Zf)/Neuro2A-Plagl1-ChIP-Seq(GSE75942)/Homer	HAWGRGGCCM	0.001	-7.423	0.0134	644	0.3922	34374.5	0.3534
CTCFGain	26	GLIS3(Zf)/Thyroid-Glis3.GFP-ChIP-Seq(GSE103297)/Homer	CTCCCTGGGAGGCCN	0.01	-5.872	0.0324	496	0.3021	26368	0.2711
CTCFGain	27	ELF3(ETS)/PDAC-ELF3-ChIP-Seq(GSE64557)/Homer	ANCAGGAAGT	0.01	-4.697	0.0836	130	0.0792	6244.3	0.0642
CTCFGain	28	HNF6(Homeobox)/Liver-Hnf6-ChIP-Seq(ERP000394)/Homer	NTATYGATCH	0.01	-4.707	0.0836	69	0.042	3031.4	0.0312
CTCFGain	29	Atoh1(bHLH)/Cerebellum-Atoh1-ChIP-Seq(GSE22111)/Homer	VNRVCAGCTGGY	0.01	-4.905	0.0699	238	0.1449	12102.4	0.1244
CTCFGain	30	ELF5(ETS)/T47D-ELF5-ChIP-Seq(GSE30407)/Homer	ACVAGGAAGT	0.01	-5.025	0.0634	131	0.0798	6231	0.0641
CTCFGain	31	Foxa2(Forkhead)/Liver-Foxa2-ChIP-Seq(GSE25694)/Homer	CYTGTTTACWYW	0.01	-5.044	0.0634	105	0.0639	4848	0.0498
CTCFGain	32	MYB(HTH)/ERMYB-Myb-ChIPSeq(GSE22095)/Homer	GGCVGTTR	0.01	-5.132	0.0593	267	0.1626	13650.3	0.1403
CTCFGain	33	Elf4(ETS)/BMDM-Elf4-ChIP-Seq(GSE88699)/Homer	ACTTCCKGKT	0.01	-5.199	0.0574	190	0.1157	9382.3	0.0965
CTCFGain	34	Ptf1a(bHLH)/Panc1-Ptf1a-ChIP-Seq(GSE47459)/Homer	ACAGCTGTTN	0.01	-5.207	0.0574	647	0.394	35344.8	0.3634
CTCFGain	35	Pax7(Paired,Homeobox),longest/Myoblast-Pax7-ChIP-Seq(GSE25064)/Homer	NTAATTDGCYAATTANNWWD	0.01	-5.473	0.045	8	0.0049	148.2	0.0015
CTCFGain	36	Elk4(ETS)/Hela-Elk4-ChIP-Seq(GSE31477)/Homer	NRYTTCCGGY	0.01	-5.589	0.041	102	0.0621	4597.3	0.0473
CTCFGain	37	AR-halfsite(NR)/LNCaP-AR-ChIP-Seq(GSE27824)/Homer	CCAGGAACAG	0.01	-5.692	0.0379	689	0.4196	37603.4	0.3866
CTCFGain	38	Hnf6b(Homeobox)/LNCaP-Hnf6b-ChIP-Seq(GSE106305)/Homer	TATTGAYY	0.01	-5.904	0.0322	115	0.07	5222.8	0.0537
CTCFGain	39	HEB(bHLH)/mES-Heb-ChIP-Seq(GSE53233)/Homer	VCAGCTGBNN	0.01	-6.808	0.0193	530	0.3228	28005.2	0.2879
CTCFGain	40	ZNF264(Zf)/HEK293-ZNF264.GFP-ChIP-Seq(GSE58341)/Homer	RGGGCACTAACY	0.01	-5.959	0.0321	120	0.0731	5474.2	0.0563
CTCFGain	41	NFkB-p65-Rel(RHD)/ThioMac-LPS-Expression(GSE23622)/Homer	GGAAATTCCC	0.01	-6.087	0.0295	17	0.0104	453	0.0047
CTCFGain	42	Olig2(bHLH)/Neuron-Olig2-ChIP-Seq(GSE30882)/Homer	RCCATMTGTT	0.01	-6.097	0.0295	368	0.2241	19023.1	0.1956
CTCFGain	43	FXR(NR),ER2/Liver-FXR-ChIP-Seq(GSE133700)/Homer	NTGACCYMKRGGTCA	0.01	-6.233	0.0265	99	0.0603	4342.3	0.0446
CTCFGain	44	FOXP1(Forkhead)/H9-FOXP1-ChIP-Seq(GSE31006)/Homer	NYYTGTTTACHN	0.01	-6.367	0.0238	61	0.0371	2422.1	0.0249
CTCFGain	45	MafA(bZIP)/Islet-MafA-ChIP-Seq(GSE30298)/Homer	TGCTGACTCA	0.01	-6.406	0.0237	155	0.0944	7239.5	0.0744
CTCFGain	46	ERb(NR),IR3/Ovary-ERb-ChIP-Seq(GSE203391)/Homer	RGGTCAGGGTGACCT	0.01	-6.435	0.0237	76	0.0463	3152.5	0.0324
CTCFGain	47	Foxf1(Forkhead)/Lung-Foxf1-ChIP-Seq(GSE77951)/Homer	WWATRTAAACAN	0.01	-6.464	0.0237	120	0.0731	5390.3	0.0554
CTCFGain	48	EBF2(EBF)/BrownAdipose-EBF2-ChIP-Seq(GSE97114)/Homer	NABTCCCWDGGGAVH	0.01	-6.537	0.0228	207	0.1261	10001.6	0.1028
CTCFGain	49	Nkx6.1(Homeobox)/Islet-Nkx6.1-ChIP-Seq(GSE40975)/Homer	GKTAATGR	0.01	-6.691	0.0206	332	0.2022	16838.6	0.1731
CTCFGain	50	EWS:ERG-fusion(ETS)/CADO_ES1-EWS:ERG-ChIP-Seq(SRA014231)/Homer	ATTTCCTGTN	0.01	-6.707	0.0206	133	0.081	6027.5	0.062
CTCFGain	51	FoxD3(forkhead)/ZebrafishEmbryo-Foxd3.biotin-ChIP-seq(GSE106676)/Homer	TGTTTAYTTAGC	0.01	-4.657	0.0846	119	0.0725	5663	0.0582
CTCFGain	52	Bcl11a(Zf)/HSPC-BCL11A-ChIP-Seq(GSE104676)/Homer	TYTGACCASWRG	0.01	-6.868	0.0189	197	0.12	9392.6	0.0966
CTCFGain	53	Tlx?(NR)/NPC-H3K4me1-ChIP-Seq(GSE16256)/Homer	CTGGCAGSCTGCCA	0.01	-5.957	0.0321	107	0.0652	4797.9	0.0493
CTCFGain	54	BMYB(HTH)/Hela-BMYB-ChIP-Seq(GSE27030)/Homer	NHAACBGYYV	0.01	-4.613	0.0867	223	0.1358	11352.6	0.1167
